# Supplementary material for: GREAT improves functional interpretation of cis-regulatory regions
Source: Springer Nature journal article supplement (doi:10.1038/nbt.1630), 2010-05-01
Supplement: 41587_2010_BFnbt1630_MOESM11_ESM.pdf [file 41587_2010_BFnbt1630_MOESM11_ESM.pdf]

# GREAT, a functional enrichment approach and tool for interpretation of genome-wide *cis*-regulatory datasets

Cory Y. McLean<sup>1</sup>, Dave Bristol<sup>1,2</sup>, Michael Hiller<sup>2</sup>, Shoa L. Clarke<sup>3</sup>,  
Bruce T. Schaar<sup>2</sup>, Craig B. Lowe<sup>4</sup>, Aaron M. Wenger<sup>1</sup>, and Gill Bejerano<sup>1,2</sup>

<sup>1</sup>Department of Computer Science, Stanford University, Stanford, CA 94305, USA

<sup>2</sup>Department of Developmental Biology, Stanford University, Stanford, CA 94305, USA

<sup>3</sup>Department of Genetics, Stanford University, Stanford, CA 94305, USA

<sup>4</sup>Center for Biomolecular Science and Engineering,

University of California Santa Cruz, Santa Cruz, CA 95064, USA

Correspondence should be addressed to G.B. (bejerano@stanford.edu).

04/01/10

## Contents

|                                    |    |
|------------------------------------|----|
| SUPPLEMENTARY NOTES . . . . .      | 2  |
| SUPPLEMENTARY REFERENCES . . . . . | 10 |
| SUPPLEMENTARY FIGURES . . . . .    | 13 |
| SUPPLEMENTARY TABLES . . . . .     | 17 |

# SUPPLEMENTARY NOTES

## Ontologies supported

GREAT assimilates knowledge from 20 separate ontologies containing biological knowledge about gene functions, phenotype and disease associations, biological pathways, gene expression data, presence of regulatory motifs, and gene families (**Supplementary Table 1**). Statistics for each ontology list the total number of terms in the ontology that are currently tested by GREAT, the number of genes annotated with one or more terms in the ontology, and the number of direct associations between ontology terms and genes (**Supplementary Tables 2 and 3**). Some ontologies contain parent/child relationships between terms expressed as a directed acyclic graph; general terms within these ontologies inherit genes that are only labeled with more specific child terms as indirect associations. To increase statistical power (by reducing the multiple hypothesis correction factor), GREAT does not test any general term whose associated gene list is identical to the associated gene list of a more specific child term. The following ontologies are currently used:

### Gene Ontology

The *Gene Ontology* (GO; <http://www.geneontology.org/>) provides a controlled vocabulary to describe attributes of gene products<sup>1</sup>. GO contains three separate ontologies that describe molecular functions, biological processes, and cellular components of proteins.

### Mouse Phenotype

The Mouse Genome Informatics (MGI) resource contains data about mouse genotype–phenotype associations primarily obtained via literature curation<sup>2,3</sup> (<http://www.informatics.jax.org/phenotypes.shtml>). Phenotypic terms are canonicalized and relationships between terms are enumerated in the Mammalian Phenotype Ontology<sup>4</sup>.

### MSigDB Ontologies

The Molecular Signatures Database (MSigDB; <http://www.broad.mit.edu/gsea/msigdb/>) contains a collection of gene sets<sup>5</sup>. The following description of the various ontologies within MSigDB is taken from <http://www.broad.mit.edu/gsea/msigdb/collections.jsp>.

- *MSigDB Cancer Neighborhood*  
Computational gene sets defined by mining large collections of cancer-oriented microarray data. Gene sets defined by expression neighborhoods centered on 380 cancer-associated genes<sup>6</sup>. This collection is identical to that previously reported in<sup>5</sup>.
- *MSigDB Cancer Modules*  
Computational gene sets defined by mining large collections of cancer-oriented microarray data<sup>7</sup>. Briefly, the authors compiled gene sets (“modules”) from a variety of resources such as KEGG, GO, and others. By mining a large compendium of cancer-related microarray data, they identified 456 such modules as significantly changed in a variety of cancer conditions.
- *MSigDB Pathway*  
Gene sets from pathway databases. Usually, these gene sets are canonical representations of a biological process compiled by domain experts.
- *MSigDB Perturbation*  
Gene sets that represent gene expression signatures of genetic and chemical perturbations.
- *MSigDB Predicted Promoter Motifs*  
Sets of genes that share a transcription factor binding site defined in the TRANSFAC (version 7.4, <http://www.gene-regulation.com/>) database. Each of these gene sets is annotated by a TRANSFAC record.

- *MSigDB miRNA Motifs*  
Sets of genes that share a 3'-UTR microRNA binding motif.

## PANTHER Pathway

*PANTHER Pathway* (<http://www.pantherdb.org/pathway/>) contains information on biological pathways (primarily signaling pathways)<sup>8</sup>. PANTHER pathways are collections of biological molecules and the reactions in which they participate. Only well-documented reactions and relationships are listed.

## Pathway Commons

*Pathway Commons*<sup>9</sup> contains a comprehensive collection of pathways from multiple sources listed at <http://www.pathwaycommons.org/pc/>. According to the website, “[p]athways include biochemical reactions, complex assembly, transport and catalysis events, and physical interactions involving proteins, DNA, RNA, small molecules and complexes.”

## BioCyc Pathway

*BioCyc* (<http://biocyc.org/>) contains information linking genes to the metabolic pathways in which they participate<sup>10</sup>.

## MGI Expression: Detected & Not Detected

The Gene Expression Database (GXD, <http://www.informatics.jax.org/expression.shtml>), a part of the Mouse Genome Informatics database, contains expression data with a focus on gene expression during mouse development<sup>3,11</sup>. The information is primarily obtained from the literature via manual curation. Each entry gives the expression in a specific anatomical structure during a specific developmental period or “Theiler stage”<sup>12</sup>. The anatomy for each developmental stage is represented by a directed acyclic graph that gives a hierarchy of anatomical terms and their relationships. The database contains information about which genes are expressed and which are not found to be expressed.

We represent the MGI Gene Expression Database by several sub-ontologies, where each sub-ontology is specific to a developmental stage. We then combine all sub-ontologies into one ontology so that all developmental stages are tested at once. *MGI Expression: Detected* contains data about genes that are expressed and *MGI Expression: Not Detected* contains data about genes whose expression is measured but not experimentally detected.

The human *MGI Expression* ontologies are derived by mapping expression information from all genes in the mouse ontologies to their human orthologs and assume large-scale conservation of expression patterns.

## Transcription Factor Targets

The *Transcription Factor Targets* ontology contains transcription factor (TF) target sets for human and mouse collected from literature<sup>13</sup>. Most TF target genes were identified by CHIP-chip experiments (see [http://acgt.cs.tau.ac.il/amadeus/suppl/metazoan\\_compendium.htm](http://acgt.cs.tau.ac.il/amadeus/suppl/metazoan_compendium.htm)).

## miRNA Targets

The *miRNA Targets* ontology contains miRNA target sets for human and mouse collected from literature<sup>13</sup>. miRNA target genes were identified as genes downregulated after miRNA overexpression (see [http://acgt.cs.tau.ac.il/amadeus/suppl/metazoan\\_compendium.htm](http://acgt.cs.tau.ac.il/amadeus/suppl/metazoan_compendium.htm)).

## InterPro

*InterPro* (<http://www.ebi.ac.uk/interpro/>) is a database of protein domains, families and functional sites<sup>14</sup>. InterPro annotations give information about the function, structure and evolution of the domains. InterPro combines data from several other databases (PROSITE, PRINTS, Pfam, ProDom, SMART, TIGRFAMs, PIRSF, SUPERFAMILY, PANTHER and Gene3D).

## TreeFam

The Tree families database (TreeFam, <http://www.treefam.org/>) contains information about the evolutionary history (both orthologs and paralogs) of gene families<sup>15</sup>. A gene family is defined as “a group of genes that evolved after the speciation of single-metazoan animals”. We format this data into an ontology by creating an ontology term for each gene family and then associating each gene within the species (human or mouse) with its gene family.

## HGNC Gene Families

The HUGO Gene Nomenclature Committee groups genes into gene families based on sequence similarity, data from the literature and other databases, and manual curation<sup>16</sup>. The groupings are listed at <http://www.genenames.org/genefamily.html>.

## Website architecture

The GREAT website output is generated by way of server-side PHP code invoking a Python wrapper over a C program. The C code makes use of the UCSC Genome Browser<sup>17</sup> code libraries and performs the core calculations. Test results are formatted for web display using Python and PHP code. GREAT uses the DataTable control from the Yahoo! User Interface Library (<http://developer.yahoo.com/yui/>) and custom JavaScript code to allow many user operations without need for more server data. This allows rapid responses for all filtering requests once the initial results page has loaded locally. Operations which generate new pages, such as getting details for a single ontology term or the generation of publication quality table display do involve return trips to the server, which are handled by PHP code.

## Graphical User Interface

The graphical user interface (GUI) of GREAT version 1.1.3 has the following components:

- *User Input*

The user input page (**Supplementary Fig. 4a**) requires two inputs from the user: the organism genome assembly in which the analysis should be performed and the *cis*-regulatory regions to analyze in BED format<sup>17</sup>. Optionally, the user can upload a background set of genomic regions to test against rather than the whole genome. The user can also optionally alter the association rules between *cis*-regulatory regions and their putative target genes from the default *basal plus extension* rule via the Advanced options tab.

- *Global Output & Controls*

Upon submission of a dataset, users are directed to the global output screen of GREAT (**Supplementary Fig. 4b**). By default, only ontology terms significant by both the binomial and hypergeometric tests using the multiple hypothesis correction false discovery rate (FDR)<sup>18</sup>  $\leq 0.05$  whose binomial fold enrichment is at least 2.0 are displayed. The extensive global controls at the top of the page allow users to change the ontologies shown, alter the data columns displayed for each result term, and change the multiple test correction type and threshold. The number of enriched terms shown for each ontology, the display of terms not significant by one or both of the enrichment tests, and the filtering of terms by their descriptions can all be changed via the global controls.

Within each ontology table, terms can be sorted by any data column except FDR. The data for a single table can be downloaded either as HTML or as a tab-separated file. By clicking on a particular term, additional information is presented in an individual term page (described below).

- *Individual Term Page*

Each ontology term tested for enrichment has an associated individual term page (**Supplementary Fig. 4c**). The page lists all *cis*-regulatory regions that reside within the regulatory domain of any gene annotated with the term, all the genes annotated with the term that possess one or more input regions within its regulatory domain, and the definition of the ontology term from the source website inset into

the page. By clicking on any *cis*-regulatory region listed, users can navigate to the UCSC Genome Browser with custom tracks of the entire input set and only the elements contributing to the specific term enrichment (**Supplementary Fig. 4d**).

- *Online Documentation*

User help documentation is available at <http://great.stanford.edu/help> and includes information regarding all aspects of GREAT.

- *Demo Sets*

The SRF<sup>19</sup> and limb p300 (ref. 20) datasets presented in the main text, as well as several additional sets, are available as demonstration input sets for GREAT. These sets can be tested by navigating to the “Demo” link.

## Comparisons of GREAT to gene-based analyses of additional ChIP-Seq studies

To assess the ability of GREAT to improve upon existing gene-based analyses of ChIP-Seq datasets, we compared GREAT enrichments to gene-based tool enrichments for multiple datasets. Where they were not performed by the original authors, we performed gene-based enrichment analyses using the Database for Annotation, Visualization, and Integrated Discovery (DAVID)<sup>21</sup>. Many other gene list-based approaches available (see **Supplementary Table 4** for a partial list) assess statistical significance in generally similar manners (reviewed in ref. 22). We used DAVID as a representative tool for the gene-based enrichment methodology because it is web-based, it integrates many different ontologies including pathways and tissue expression data, and it is a popular choice among manuscript writers. To examine the relative contributions of the integration of distal binding events with the binomial test and the unique set of ontologies supported by GREAT, we also ran “gene-based GREAT” analyses that alter the regulatory domains and significance testing to exactly mimic existing gene-based tools. The analysis of next-generation binding data is not clearly mappable to more advanced techniques like the Gene Set Enrichment Analysis (GSEA)<sup>5</sup> which rank genes by the intensity difference of the different probes/genes and are typically applied to compare gene expression profiles from two classes (e.g. people with a disease vs. healthy controls).

For each ChIP-Seq dataset we analyzed using DAVID, we mapped the identified peaks that reside within 2 kb of the TSS of the nearest gene as identified by the UCSC Known Genes track<sup>23</sup> to the nearby gene and ran enrichments over the resulting gene list. The ten most enriched terms from each annotation cluster reported significant by DAVID at a threshold of 0.05 after an FDR multiple hypothesis correction are shown in each enrichment table. To run a “gene-based GREAT”, we used the *basal plus extension* association rule with basal upstream and downstream parameters both set to 2 kb and an extension of 0 bp and excluded the set of curated regulatory domains. The ten most enriched terms significant by the hypergeometric test at a threshold of 0.05 after an FDR multiple hypothesis correction are shown in each enrichment table.

Since GREAT performs a *cis*-regulatory element-based test, no mappings from ChIP-Seq peaks to genes are required for preprocessing. For each ChIP-Seq dataset we analyzed using GREAT, we ran the identified peaks through GREAT using its default settings (the *basal plus extension* association rule with basal domains extending 5 kb upstream and 1 kb downstream of the TSS and extension to the basal domains of the nearest genes within 1 Mb). The top ten terms significant at a threshold of 0.05 by the binomial test after an FDR multiple hypothesis correction that have a fold enrichment of at least two and are also significant by the hypergeometric test are shown in each enrichment table.

### P300 in mouse developing embryonic tissues

Recent tissue-specific ChIP-Seq experiments identified 2,453, 561, and 2,105 regions of the mouse genome bound by the transcriptional coactivator protein p300 at embryonic day 11.5 in forebrain, midbrain, and limb tissues, respectively<sup>20</sup>. Assays for enhancer activity in transgenic mice at embryonic day 11.5 showed that many p300-bound regions are reproducible enhancers with strong tissue specificity<sup>20</sup>.

We ran a gene-based enrichment analysis of the p300 limb peaks using DAVID as described above, yielding the enrichments shown in **Supplementary Table 10a**. This gene-based analysis shows enrichment for p300 binding near transcription factors and hints at regulation of development and morphogenesis. However, no

enrichment for limb tissue expression or developmental stage of enhancer activity is featured, with the closest enrichments being the much broader terms “organ development” and “anatomical structure morphogenesis” (**Supplementary Table 10a**).

On the other hand, when we ran the 2,105 limb p300 ChIP-Seq peaks through GREAT using the 5+1 kb up to 1 Mb default settings, GO enrichments overwhelmingly emphasize limb morphogenesis and development as strongly enriched functions, and GREAT highlights specific functions of the set: while DAVID identifies “transcription” as a prominent term, GREAT finds significant enrichment for “transcription repressor activity”, thus markedly narrowing the focus of a much broader term (**Supplementary Table 10b**). Similarly, the *Mouse Phenotype* ontology enrichments of GREAT all include an aspect of skeletal development, contrasting again to the broad morphogenesis terms enriched by DAVID (main text, **Supplementary Table 10**).

Notably, the GREAT enrichments all draw heavily from the appropriate integration of distal binding events; over 75% of the binding peaks that contribute to every GREAT enriched term occur further than 10 kb from the TSS of the nearest gene (**Figure 3, Supplementary Table 10b**). The importance of distal binding is implicitly shown by the results of a “gene-based GREAT” analysis that only associates peaks within 2 kb of the TSS of a gene (**Supplementary Table 11**). Only two limb-specific terms are identified as enriched, and each implicate 100 to 150 fewer genes than the standard GREAT analysis. The markedly improved enrichments reported by GREAT as compared to gene-based enrichment analyses are a testament to the importance of properly integrating distal regulators into analyses of vertebrate development, and the hypothesis that p300 limb peaks indeed play a role in large-scale regulation of key genes controlling embryonic limb development is strongly supported using GREAT.

We also ran both DAVID and GREAT on the forebrain p300 peaks. As before, the DAVID gene-based enrichments are much more general than GREAT enrichments, with the most prominent DAVID term being “transcription” (**Supplementary Table 15a**). Though DAVID does also highlight “forebrain development”, GREAT analysis produces many more details from which to launch experiments to explore forebrain development (**Supplementary Table 15b**). GREAT highlights the regulation of transcription factors as well as mouse phenotypes in axonal tract formation that are affected by defects in early stages of neuronal differentiation (**Supplementary Table 15b**). In particular, GREAT offers enrichment for the basic helix-loop-helix family of transcription factors that are known to play a prominent role in cell fate at this stage of development<sup>24</sup>. Other highly relevant findings of GREAT include the *PANTHER Pathway* enrichment for the Notch signaling pathway and multiple enrichments for the Wnt signaling pathway (**Supplementary Table 15b**). At this stage of forebrain development, the production of postmitotic neurons and proliferative progenitors is indeed tightly regulated by both Notch and Wnt signaling<sup>25,26</sup>.

A “gene-based GREAT” analysis identifies forebrain-related terms as enriched, though similarly to the limb enrichments the total number of genes identified as important to the processes is markedly reduced (**Supplementary Table 16**). The difference in enrichment specificity between proximal limb and forebrain peaks suggests that forebrain development may be more specialized than limb development.

When we ran GREAT and DAVID on the 561 midbrain p300 peaks, DAVID failed to yield any significant results. In contrast, GREAT analysis highlighted many terms related to embryonic brain development (**Supplementary Table 20**), including both terms also enriched in the forebrain set and enrichments unique to the midbrain (see main text). Nearly all of the 561 midbrain peaks lie distal to genes: only 28 genes have a midbrain peak within their proximal promoter. Consequently, “gene-based GREAT” identifies only three total enriched terms involving seven total genes (**Supplementary Table 21**).

All three datasets have the majority of their binding peaks occur over 50 kb from the TSS of any gene (**Figure 2a**). Consequently, while the limb, forebrain, and midbrain ontology terms are still enriched in GREAT analyses that only extend regulatory domains up to 50 kb (**Supplementary Tables 12, 17, and 22**, respectively), half of the genomic regions and associated genes are lost. The enrichment of limb (**Supplementary Tables 13, 14**), forebrain (**Supplementary Tables 18, 19**), and midbrain (**Supplementary Tables 23, 24**) terms are all robust to variation of the distal association rule used.

### P300 in mouse embryonic stem cells

A recent ChIP-Seq analysis of transcription factors involved in the maintenance of the self-renewal and pluripotency capabilities of embryonic stem cells (ESCs) assayed genome-wide binding of p300 within mouse ESCs<sup>27</sup>. The binding profile of p300 was noted to co-localize with the binding profiles of Nanog, Oct4, and Sox2 (ref. 27), which are known to be involved in stem cell maintenance<sup>28</sup>.

When we ran DAVID on the associated gene set, no annotation terms were found to be statistically significant (**Supplementary Table 25a**). We then analyzed all 524 identified p300 ChIP-Seq peaks<sup>27</sup> with GREAT using the default settings (5+1 kb basal, up to 1 Mb extension). GO enrichments indicate that chromatin binding and transcriptional regulator proteins are targets of p300 in ESCs, with striking enrichments for genes involved in stem cell maintenance and stem cell differentiation (**Supplementary Table 25b**). The *MGI Expression: Detected* ontology shows enrichment for genes expressed during the very first stages of development<sup>12</sup>, consistent with stem cell maintenance. The *Predicted Promoter Motifs* ontology shows enrichment for p300 binding near genes whose promoters contain binding sites for GTF3A and NHLH1. GTF3A, which helps to assemble active chromatin, is required for transcription of the 5S RNA genes that drive growth in early developing embryos<sup>29</sup>. While the significance of NHLH1 binding to stem cell maintenance is not known, NHLH1 is known to be expressed in the developing nervous system<sup>30</sup>.

The “gene-based GREAT” results identify stem cell differentiation as an enriched term, but none of the other top enriched terms overlap the enrichments displayed by GREAT (**Supplementary Table 26**). Running GREAT with a more limited extension (5+1 kb basal, up to 50 kb extension) highlights more general terms as enriched and no longer emphasizes enrichment for genes expressed in early development (**Supplementary Table 27**). Distal binding appears to contribute greatly to the function of p300 in embryonic stem cells, as demonstrated by nearly 40% of all binding occurring outside of 50 kb from the TSS of any gene (**Figure 2a**). Variation in distal association rules leads to generally similar enrichments as the default GREAT, emphasizing genes involved in stem cell maintenance and expressed in early development (**Supplementary Tables 28, 29**).

### Signal transducer and activator of transcription 3 (Stat3) in mouse embryonic stem cells

The binding events of Signal transducer and activator of transcription 3 (Stat3) were also assayed within mouse ESCs using ChIP-Seq in the study mentioned above<sup>27</sup>. Stat3 is a transcriptional activator whose activity is sufficient to maintain an undifferentiated state of mouse ESCs<sup>31</sup>, but whose constitutive expression has also been linked to various cancers<sup>32</sup>. Stat3 transduces signals from the IL-6 family of cytokine receptors<sup>33</sup>. One of these cytokines, Leukemia Inhibitory Factor (LIF), is a component of media used to culture ESCs in an undifferentiated state.

Gene-based DAVID enrichments for the Stat3 dataset were calculated in the manner described above. The enriched terms from the gene-based analysis are very general, hinting mainly at roles for Stat3 in metabolic processes and regulation (**Supplementary Table 30a**).

**Supplementary Table 30b** displays the *cis*-regulatory element-based enrichments produced by GREAT for the same set using the default settings (5+1 kb basal, up to 1 Mb extension). In contrast to the generality of DAVID’s term enrichments, GREAT produces many highly specific and accurate enrichments and yields novel, testable hypotheses. *GO Biological Process* enrichments indicate Stat3 regulates genes involved in both stem cell maintenance and differentiation. The *Mouse Phenotype* ontology shows enrichment for genes whose alteration leads to embryonic lethality before somite formation and abnormal placental development (**Supplementary Table 30b**). Stat3 is indeed essential; Stat3 knockout mice are embryonic lethal at early stages of development<sup>34</sup>. The *PANTHER Pathway* ontology suggests that Stat3 modulates the Interferon- $\gamma$  signaling pathway. Interestingly, though Stat3 mediation of the Interferon- $\gamma$  pathway has yet to be shown, Interferon- $\gamma$  has recently been shown to suppress Stat3 via dephosphorylation<sup>35</sup>. The *MSigDB Pathway* ontology shows enrichment for genes expressed in breast cancers, especially those involved in estrogen-receptor-dependent signal transduction. STAT3 expression is frequently detected in breast cancer tissues<sup>36</sup>, though a clear link between Stat3 and estrogen receptor expression has yet to be shown. The *MSigDB Perturbation* ontology enrichment for genes upregulated after LIF treatment highlights the link between LIF and Stat3 (**Supplementary Table 30b**); LIF activates the JAK/STAT signaling pathway

of which Stat3 is a part<sup>37</sup>. LIF is also an important factor in uterine blastocyst implantation, though its expression is required in the utero-placental unit rather than the blastocyst (from which ESCs are derived)<sup>38</sup>. Thus it is striking that GREAT highlights the *Mouse Phenotype* “abnormal trophoblast layer morphology” and the *MGI Expression: Detected* enrichments for trophoblast and extraembryonic component in Theiler stage 5 (**Supplementary Table 30b**). The binding of Stat3 to these regions may reflect the totipotent state of ESCs or an overlap between genes expressed in trophoblast and the blastocyst. The *MSigDB Perturbation* ontology also shows enrichment for genes downregulated by expression of constitutively active JUN N-terminal kinase (JNK). Indeed, JNK is known to be a negative regulator of Stat3<sup>39</sup>. Furthermore, the strong enrichment for genes upregulated by insulin is explained by the ability of insulin to activate Stat3<sup>40</sup>. Finally, there is enrichment for transcriptional modulators present during myeloid differentiation, and indeed, Stat3 is an essential component for myeloid differentiation<sup>41</sup>.

Results from a “gene-based GREAT” analysis recapitulate DAVID’s generality in GO enrichments, with none of the top enrichments indicating the roles of Stat3 in stem cell maintenance and differentiation (**Supplementary Table 31**). The *Mouse Phenotype* ontology enrichments are also more general than in the standard GREAT analysis, with placenta morphology identified but the early embryonic lethality unidentified. Similarly to the p300 in embryonic stem cells example, the *basal plus extension* with a restricted enrichment domain highlights more general terms and appears more similar to the “gene-based GREAT” (**Supplementary Table 32**), while the *two nearest genes* and *single nearest gene* association rules lead to similar enrichments to the default GREAT (**Supplementary Tables 33** and **34**, respectively).

Overall, by coupling appropriate integration of distal binding events with data from many ontologies spanning a wide variety of biological phenomena, GREAT highlights many known functions of Stat3 in mouse ESCs that gene-based tools fail to feature prominently (**Supplementary Table 30**). Experimentally-validated links between Stat3 and its pathway involvements, its known cofactors, and its role in stem cell maintenance are all highlighted by various ontologies. In addition, novel hypotheses of Stat3 involvement in trophoblast development and its additional cofactors can be studied by targeted future experimentation.

### Neuron-restrictive silencer factor (NRSF) in human Jurkat cells

To assess the functional roles of Neuron-Restrictive Silencer Factor (NRSF, also known as RE1-Silencing Transcription Factor or REST), we used ChIP-Seq binding data from human Jurkat cells<sup>19</sup>. NRSF is a transcription factor involved in silencing neuron-specific genes<sup>42–44</sup>.

A gene-based analysis of the dataset identified enrichment for genes “mostly involved in neuronal function”<sup>19</sup>. The top ten results of the analysis are reproduced in **Supplementary Table 35a**.

We ran GREAT on a dataset comprised of the most significant ChIP-Seq peaks of NRSF (QuEST score > 1; n = 1,712) using a whole genome background and default settings. Enriched terms overwhelmingly implicate NRSF as binding near genes involved in ion channel activity, neurotransmitter transport, and synaptic transmission (**Supplementary Table 35b**). Additionally, the *GO Cellular Component*, *Mouse Phenotype*, *InterPro*, and *HGNC Gene Families* ontologies indicate that NRSF binds near both calcium channel and potassium channel genes. NRSF has been shown to modulate aldosterone and cortisol production by regulating a calcium channel subunit<sup>45</sup>. NRSF has also been shown to regulate potassium channel expression, affecting the phenotype of human vascular smooth muscle cells<sup>46</sup>. The GREAT enrichments suggest that NRSF may play a role in regulating other calcium and potassium channel genes as well.

The enrichments are robust to all variations of association rule including a “gene-based GREAT” (**Supplementary Tables 36–39**). The ability of both the gene-based analyses and GREAT to identify the neuron-specific functions of NRSF binding data suggests that both proximal and distal binding events play a role in the transcriptional repression of neuron-specific genes<sup>44</sup>. Given the high information content of the 21 bp neuron-restrictive silencer element (NRSE) bound by NRSF<sup>42,43</sup>, binding of NRSF to the NRSE may be predominantly functional regardless of the location of the binding area relative to nearby genes (**Figure 2a**).

### GA-Binding Protein (GABP) in human Jurkat cells

The binding profile of GA-Binding Protein (GABP) was assayed in human Jurkat cells via ChIP-Seq<sup>19</sup>. GABP is a ubiquitous transcription factor that controls transcriptional regulation of genes involved in many



diverse functions including apoptosis, differentiation, cell cycle, and cellular energy metabolism<sup>47</sup>.

A gene-based analysis of GABP-regulated genes showed enrichment for genes “involved in basic cellular processes, particularly those related to gene expression”<sup>19</sup>. The top ten results are reproduced in **Supplementary Table 40a**.

Due to the large number (6,442) of GABP binding peaks present in the dataset, more than 3,000 genes possess a GABP binding peak even within their proximal promoter. As a result the DAVID website cannot even be used to analyze this set, as it can only analyze datasets of 3,000 or fewer genes. In contrast, GREAT can handle datasets of hundreds of thousands of genomic peaks, and any number of resulting gene picks. We ran GREAT on the most significant ChIP-Seq peaks of GABP (QuEST score > 1, n = 3,585) using a whole genome background and default settings (**Supplementary Table 40b**).

Enrichments from the *Pathway Commons* ontology highlight the known functions of GABP as a transcriptional activator, as the strongest enrichment is for genes involved in transcription. Interestingly, there are also strong enrichments for genes involved in various aspects of mRNA processing, with the *MSigDB Pathway* ontology highlighting genes involved in mRNA splicing as its strongest enrichment. GABP has been shown to regulate Hepatocyte Growth Factor-Regulated Tyrosine Kinase Substrate, a protein that mediates alternative mRNA splicing during liver regeneration<sup>47,48</sup>. The *MSigDB Pathway* and *GO Molecular Function* ontologies also show strong enrichments for ribosomal proteins. Indeed, GABP is known to regulate multiple ribosomal proteins<sup>49,50</sup>, though the extent of GABP binding suggests that many other ribosomal proteins may also be regulated by GABP. Furthermore, GABP regulates transcription of eIF6, an essential trans-acting factor in ribosome biogenesis<sup>51</sup>. The *MSigDB Pathway* enriched terms “oxidative phosphorylation” and “electron transport” also correspond to known functions of GABP; GABP regulates mtTFA, a mitochondrial transcription factor important in oxidative phosphorylation<sup>52</sup>. Finally, the *Transcription Factor Targets* ontology indicates that GABP binding peaks occur near genes that are regulated by ETS1 and YY1, suggesting a possible cooperative role between GABP and these factors. GABP itself is part of the ETS family, and ChIP-Seq experiments examining the binding of both GABP and ETS1 show that the proteins do bind many similar promoters, though GABP is in general a more ubiquitous factor<sup>53</sup>. Interactions between GABP and YY1 have also been experimentally shown<sup>47,54</sup>.

As GABP binds predominantly near the promoter of its target genes (**Figure 2a**), the unique enrichments highlighted by GREAT ontologies are robust to both gene-based analysis (**Supplementary Table 41**) and for all tested variations of association rule (**Supplementary Tables 42–44**).

## SUPPLEMENTARY REFERENCES

1. Ashburner, M. *et al.* Gene ontology: tool for the unification of biology. The Gene Ontology Consortium. *Nat Genet* **25**, 25–29 (2000).
2. Blake, J. A. *et al.* The Mouse Genome Database genotypes::phenotypes. *Nucleic Acids Res.* **37**, D712–719 (2009).
3. Bult, C. J., Eppig, J. T., Kadin, J. A., Richardson, J. E. & Blake, J. A. The Mouse Genome Database (MGD): mouse biology and model systems. *Nucleic Acids Res.* **36**, D724–728 (2008).
4. Smith, C. L., Goldsmith, C. A. & Eppig, J. T. The Mammalian Phenotype Ontology as a tool for annotating, analyzing and comparing phenotypic information. *Genome Biol.* **6**, R7 (2005).
5. Subramanian, A. *et al.* Gene set enrichment analysis: a knowledge-based approach for interpreting genome-wide expression profiles. *Proc. Natl. Acad. Sci. U.S.A.* **102**, 15545–15550 (2005).
6. Brentani, H. *et al.* The generation and utilization of a cancer-oriented representation of the human transcriptome by using expressed sequence tags. *Proc. Natl. Acad. Sci. U.S.A.* **100**, 13418–13423 (2003).
7. Segal, E., Friedman, N., Koller, D. & Regev, A. A module map showing conditional activity of expression modules in cancer. *Nat. Genet.* **36**, 1090–1098 (2004).
8. Mi, H., Guo, N., Kejariwal, A. & Thomas, P. D. PANTHER version 6: protein sequence and function evolution data with expanded representation of biological pathways. *Nucleic Acids Res.* **35**, D247–252 (2007).
9. Cerami, E. G., Bader, G. D., Gross, B. E. & Sander, C. cPath: open source software for collecting, storing, and querying biological pathways. *BMC Bioinformatics* **7**, 497 (2006).
10. Caspi, R. *et al.* The MetaCyc Database of metabolic pathways and enzymes and the BioCyc collection of Pathway/Genome Databases. *Nucleic Acids Res.* **36**, D623–631 (2008).
11. Smith, C. M. *et al.* The mouse Gene Expression Database (GXD): 2007 update. *Nucleic Acids Res.* **35**, D618–623 (2007).
12. Theiler, K. *The House Mouse: Development and Normal Stages from Fertilization to 4 Weeks of Age* (Springer-Verlag, New York, 1989).
13. Linhart, C., Halperin, Y. & Shamir, R. Transcription factor and microRNA motif discovery: the Amadeus platform and a compendium of metazoan target sets. *Genome Res.* **18**, 1180–1189 (2008).
14. Hunter, S. *et al.* InterPro: the integrative protein signature database. *Nucleic Acids Res.* **37**, D211–215 (2009).
15. Ruan, J. *et al.* TreeFam: 2008 Update. *Nucleic Acids Res.* **36**, D735–740 (2008).
16. Bruford, E. A. *et al.* The HGNC Database in 2008: a resource for the human genome. *Nucleic Acids Res.* **36**, D445–448 (2008).
17. Kent, W. J. *et al.* The human genome browser at UCSC. *Genome Res.* **12**, 996–1006 (2002).
18. Benjamini, Y. & Hochberg, Y. Controlling the false discovery rate – a practical and powerful approach to multiple hypothesis testing. *J. R. Stat. Soc. Ser. B* **57**, 289–300 (1995).
19. Valouev, A. *et al.* Genome-wide analysis of transcription factor binding sites based on ChIP-Seq data. *Nat. Methods* **5**, 829–834 (2008).
20. Visel, A. *et al.* ChIP-seq accurately predicts tissue-specific activity of enhancers. *Nature* **457**, 854–858 (2009).

21. Huang, d. a. W. *et al.* DAVID Bioinformatics Resources: expanded annotation database and novel algorithms to better extract biology from large gene lists. *Nucleic Acids Res.* **35**, W169–175 (2007).
22. Khatri, P. & Draghici, S. Ontological analysis of gene expression data: current tools, limitations, and open problems. *Bioinformatics* **21**, 3587–3595 (2005).
23. Hsu, F. *et al.* The UCSC Known Genes. *Bioinformatics* **22**, 1036–1046 (2006).
24. Powell, L. M. & Jarman, A. P. Context dependence of proneural bHLH proteins. *Curr. Opin. Genet. Dev.* **18**, 411–417 (2008).
25. Shen, Q., Zhong, W., Jan, Y. N. & Temple, S. Asymmetric Numb distribution is critical for asymmetric cell division of mouse cerebral cortical stem cells and neuroblasts. *Development* **129**, 4843–4853 (2002).
26. Zhou, C. J., Borello, U., Rubenstein, J. L. & Pleasure, S. J. Neuronal production and precursor proliferation defects in the neocortex of mice with loss of function in the canonical Wnt signaling pathway. *Neuroscience* **142**, 1119–1131 (2006).
27. Chen, X. *et al.* Integration of external signaling pathways with the core transcriptional network in embryonic stem cells. *Cell* **133**, 1106–1117 (2008).
28. Ivanova, N. *et al.* Dissecting self-renewal in stem cells with RNA interference. *Nature* **442**, 533–538 (2006).
29. Drew, P. D. *et al.* Cloning and expression analysis of a human cDNA homologous to Xenopus TFIIIA. *Gene* **159**, 215–218 (1995).
30. Begley, C. G. *et al.* Molecular characterization of NSCL, a gene encoding a helix-loop-helix protein expressed in the developing nervous system. *Proc. Natl. Acad. Sci. U.S.A.* **89**, 38–42 (1992).
31. Matsuda, T. *et al.* STAT3 activation is sufficient to maintain an undifferentiated state of mouse embryonic stem cells. *EMBO J.* **18**, 4261–4269 (1999).
32. Bromberg, J. F. *et al.* Stat3 as an oncogene. *Cell* **98**, 295–303 (1999).
33. Hirano, T., Ishihara, K. & Hibi, M. Roles of STAT3 in mediating the cell growth, differentiation and survival signals relayed through the IL-6 family of cytokine receptors. *Oncogene* **19**, 2548–2556 (2000).
34. Takeda, K. *et al.* Targeted disruption of the mouse Stat3 gene leads to early embryonic lethality. *Proc. Natl. Acad. Sci. U.S.A.* **94**, 3801–3804 (1997).
35. Fang, P., Hwa, V. & Rosenfeld, R. G. Interferon-gamma-induced dephosphorylation of STAT3 and apoptosis are dependent on the mTOR pathway. *Exp. Cell Res.* **312**, 1229–1239 (2006).
36. Hsieh, F. C., Cheng, G. & Lin, J. Evaluation of potential Stat3-regulated genes in human breast cancer. *Biochem. Biophys. Res. Commun.* **335**, 292–299 (2005).
37. Kisseleva, T., Bhattacharya, S., Braunstein, J. & Schindler, C. W. Signaling through the JAK/STAT pathway, recent advances and future challenges. *Gene* **285**, 1–24 (2002).
38. Auernhammer, C. J. & Melmed, S. Leukemia-inhibitory factor-neuroimmune modulator of endocrine function. *Endocr. Rev.* **21**, 313–345 (2000).
39. Lim, C. P. & Cao, X. Serine phosphorylation and negative regulation of Stat3 by JNK. *J. Biol. Chem.* **274**, 31055–31061 (1999).
40. Coffey, P. J. *et al.* Insulin activates Stat3 independently of p21ras-ERK and PI-3K signal transduction. *Oncogene* **15**, 2529–2539 (1997).
41. McLemore, M. L. *et al.* STAT-3 activation is required for normal G-CSF-dependent proliferation and granulocytic differentiation. *Immunity* **14**, 193–204 (2001).

42. Chong, J. A. *et al.* REST: a mammalian silencer protein that restricts sodium channel gene expression to neurons. *Cell* **80**, 949–957 (1995).
43. Schoenherr, C. J. & Anderson, D. J. The neuron-restrictive silencer factor (NRSF): a coordinate repressor of multiple neuron-specific genes. *Science* **267**, 1360–1363 (1995).
44. Chen, Z. F., Paquette, A. J. & Anderson, D. J. NRSF/REST is required in vivo for repression of multiple neuronal target genes during embryogenesis. *Nat. Genet.* **20**, 136–142 (1998).
45. Somekawa, S. *et al.* Regulation of aldosterone and cortisol production by the transcriptional repressor neuron restrictive silencer factor. *Endocrinology* **150**, 3110–3117 (2009).
46. Cheong, A. *et al.* Downregulated REST transcription factor is a switch enabling critical potassium channel expression and cell proliferation. *Mol. Cell* **20**, 45–52 (2005).
47. Rosmarin, A. G., Resendes, K. K., Yang, Z., McMillan, J. N. & Fleming, S. L. GA-binding protein transcription factor: a review of GABP as an integrator of intracellular signaling and protein-protein interactions. *Blood Cells Mol. Dis.* **32**, 143–154 (2004).
48. Du, K., Leu, J. I., Peng, Y. & Taub, R. Transcriptional up-regulation of the delayed early gene HRS/SRp40 during liver regeneration. Interactions among YY1, GA-binding proteins, and mitogenic signals. *J. Biol. Chem.* **273**, 35208–35215 (1998).
49. Curčić, D., Glibetić, M., Larson, D. E. & Sells, B. H. GA-binding protein is involved in altered expression of ribosomal protein L32 gene. *J. Cell. Biochem.* **65**, 287–307 (1997).
50. Genuario, R. R., Kelley, D. E. & Perry, R. P. Comparative utilization of transcription factor GABP by the promoters of ribosomal protein genes rpL30 and rpL32. *Gene Expr.* **3**, 279–288 (1993).
51. Donadini, A. *et al.* GABP complex regulates transcription of eIF6 (p27BBP), an essential trans-acting factor in ribosome biogenesis. *FEBS Lett.* **580**, 1983–1987 (2006).
52. Chinenov, Y., Coombs, C. & Martin, M. E. Isolation of a bi-directional promoter directing expression of the mouse GABPalpha and ATP synthase coupling factor 6 genes. *Gene* **261**, 311–320 (2000).
53. Collins, P. J., Kobayashi, Y., Nguyen, L., Trinklein, N. D. & Myers, R. M. The ets-related transcription factor GABP directs bidirectional transcription. *PLoS Genet.* **3**, e208 (2007).
54. Deléhouzée, S. *et al.* GABP, HCF-1 and YY1 are involved in Rb gene expression during myogenesis. *Genes Cells* **10**, 717–731 (2005).
55. Al-Shahrour, F. *et al.* Babelomics: advanced functional profiling of transcriptomics, proteomics and genomics experiments. *Nucleic Acids Res.* **36**, W341–346 (2008).
56. Khatri, P. *et al.* Onto-Tools: new additions and improvements in 2006. *Nucleic Acids Res.* **35**, W206–211 (2007).
57. Beissbarth, T. & Speed, T. P. GOstat: find statistically overrepresented Gene Ontologies within a group of genes. *Bioinformatics* **20**, 1464–1465 (2004).
58. Zeeberg, B. R. *et al.* GoMiner: a resource for biological interpretation of genomic and proteomic data. *Genome Biol.* **4**, R28 (2003).

## SUPPLEMENTARY FIGURES

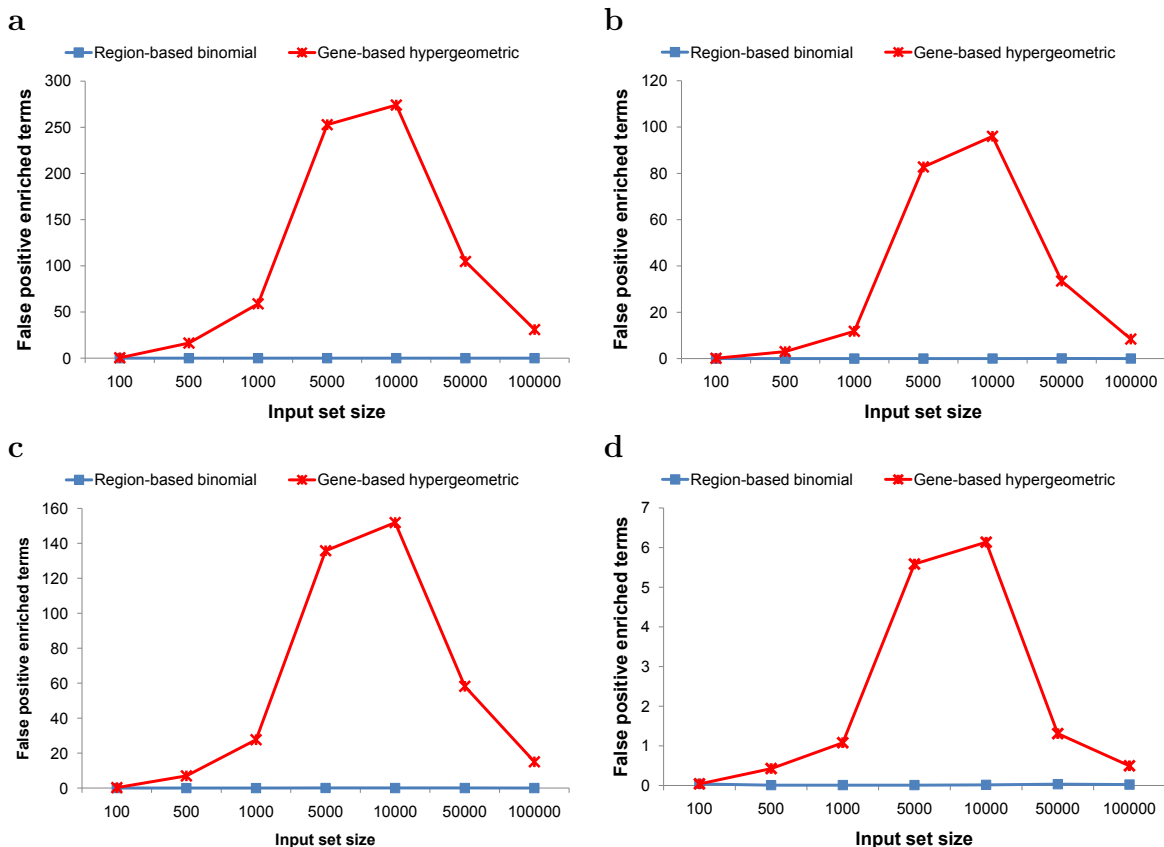

**Supplementary Figure 1:** The gene-based hypergeometric test generates false positive enriched terms in many ontologies when not restricted to only proximal binding events. The average number of false positive enriched terms for the region-based binomial (blue) and gene-based hypergeometric (red) test over 1,000 random input sets in which each base pair in the human genome (excluding assembly gaps) is equally likely to be included in the set is shown for (a) *MGI Expression: Detected*, (b) *MGI Expression: Not Detected*, (c) *Mouse Phenotype*, and (d) *InterPro*. Each test associates genomic regions to genes using GREAT's default *basal plus extension* association rule with 5+1 kb basal domain and extension up to 1 Mb (**Supplementary Methods**). False positive enriched terms are defined as those significant at a threshold of 0.05 after applying the conservative Bonferroni correction. Though the total number of average false positive terms varies across ontology (note scale changes on y-axis), the qualitative shape of the graphs is similar with the majority of false positive enriched terms occurring for input sets containing 1-50k elements.

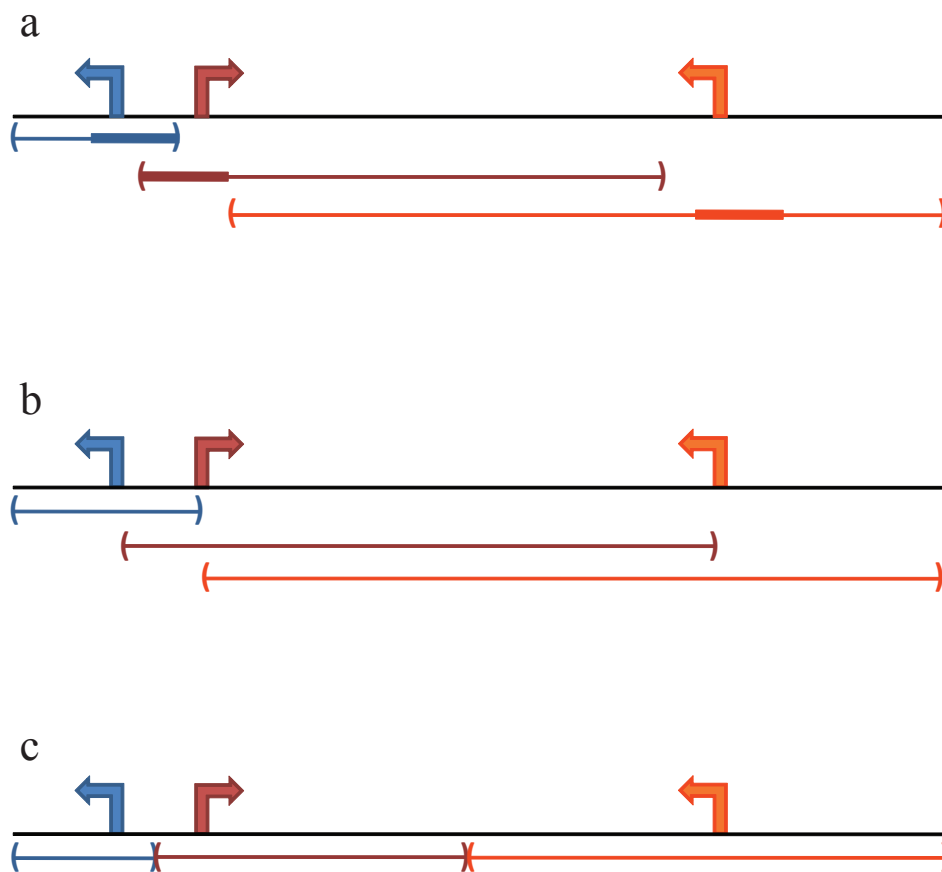

**Supplementary Figure 2:** Computationally-defined regulatory domains. The transcription start site (TSS) of each gene is shown as an arrow. The corresponding regulatory domain for each gene is shown in matching color as a bracketed line. The association rule and relevant parameters used in a run of GREAT can be altered via the web interface prior to execution. **(a)** The *basal plus extension* association rule assigns a basal regulatory domain to each gene regardless of genes nearby (thick line). The domain is then extended to the basal regulatory domain of the nearest upstream and downstream genes. **(b)** The *two nearest genes* association rule extends the regulatory domain to the TSS of the nearest upstream and downstream genes. **(c)** The *single nearest gene* association rule extends the regulatory domain to the midpoint between this gene's TSS and the nearest gene's TSS both upstream and downstream. All regulatory domain extension rules limit extension to a user-defined maximum distance for genes that have no other genes nearby.

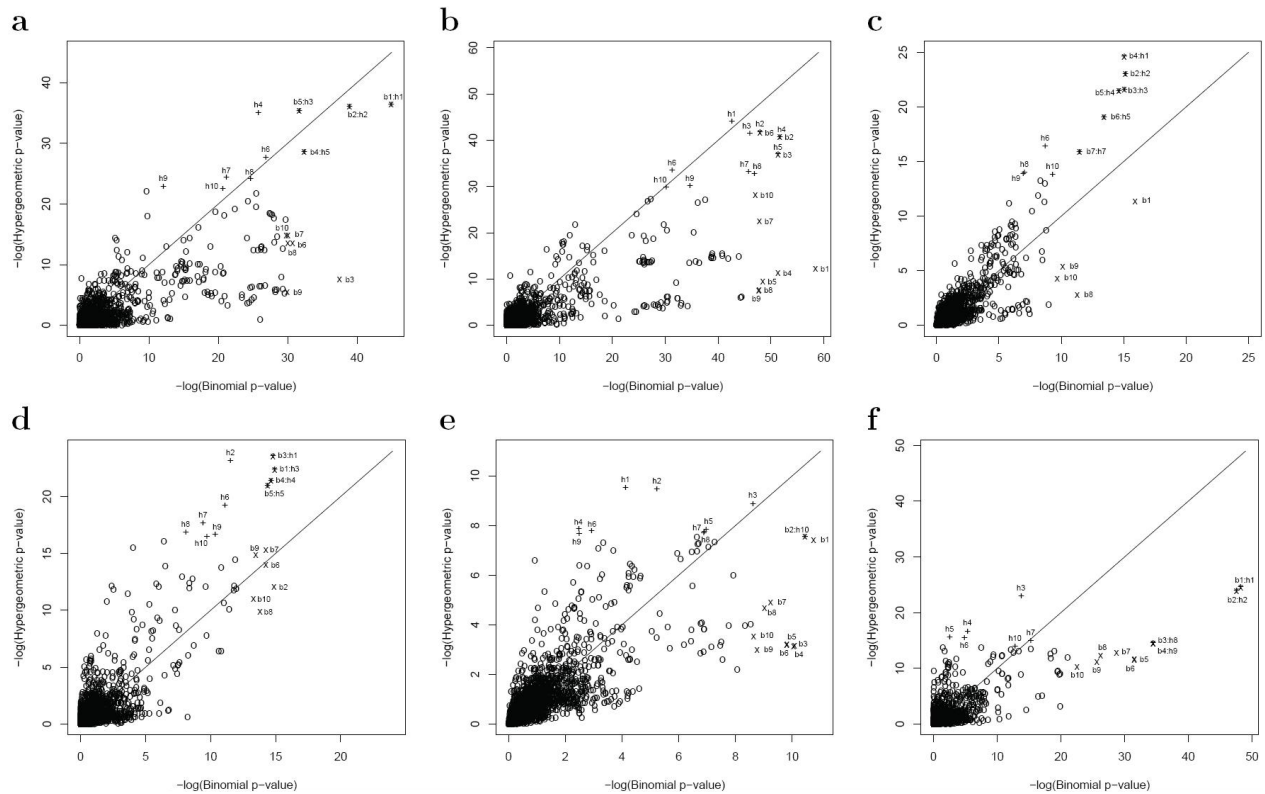

**Supplementary Figure 3:** Binomial and hypergeometric p-value differences for several different datasets. Each set uses GREAT's default *basal plus extension* association rule with 5+1 kb basal domain and extension up to 1 Mb (**Supplementary Methods**). “x” denotes a top ten most enriched term using the binomial test, with “b1” the top ranking, etc. “+” denotes a top ten most enriched term using the hypergeometric test, with “h1” denoting the top ranking, etc. **(a)** p300 mouse embryonic limb data set<sup>20</sup>. **(b)** p300 mouse embryonic forebrain data set<sup>20</sup>. **(c)** p300 mouse embryonic midbrain data set<sup>20</sup>. **(d)** NRSF human Jurkat data set<sup>19</sup>. **(e)** p300 mouse embryonic stem cell data set<sup>27</sup>. **(f)** Stat3 mouse embryonic stem cell data set<sup>27</sup>.

**a**

**Genomic Regions Enrichment of Annotations Tool**

Manuscript coding genes are well annotated with their biological functions. Non-coding regions lack such annotation. GREAT, the Genomic Regions Enrichment of Annotations Tool, assigns biological meaning to a set of non-coding genomic regions by analyzing the annotations of the nearby genes. Thus, it is particularly useful in studying cis functions of sets of non-coding genomic regions, including those identified by chromatin immunoprecipitation experiments or by a computational screen, such as conservation in a given clade.

GREAT will occasionally be unavailable due to regular maintenance on Thursdays from 7 to 9pm Pacific Time.

**Input** **Advanced**

Species assembly:  Human: NCBI build 36.1 (UCSC: hg18, Mar2006)  Mouse: NCBI build 37 (UCSC: mm9, Jul2007)

Test regions:  BED file   BED data

Background regions:  Whole genome  BED file   BED data

**Input** **Advanced**

**Associating genomic regions with genes**

GREAT calculates statistics by associating genomic regions with nearby genes and applying the gene annotations to the regions. Association is a two-step process. First, each gene is assigned a regulatory domain. Then, a genomic region is associated with all genes whose regulatory region it overlaps.

Note that all distances are measured from the transcription start site of the gene's canonical isoform.

Basal plus extension: up to 1000.0 kb, at least 5.0 kb downstream

Two nearest genes: within 1000.0 kb

Single nearest gene: within 1000.0 kb

**c**

**Genomic Regions Enrichment of Annotations Tool**

Term: **actin binding** (ID: GO:0003779) from GO Molecular Function.

GREAT calculates statistics by associating genomic regions with nearby genes and applying the gene annotations to the regions. Listed below are the genes through which associations to the term was made, and the associated test regions.

Genes: ALDOA,APPC5,CAP1,CAPZB,CCDC68A,CFL1,CNN3,COX10A,COX10,COTL1,EBH1,ELN,FLNA,FSCH1,GMFG,IPG,GGP2,LMB1,MACF1,MAP1S,MKL2,MYH9,MYO10,PALLD,PFN1,PLEKHA7,SMTN,STC3L,TPM4,VDRI1

Regions: SRF-102,SRF-108,SRF-113,SRF-118,SRF-12,SRF-125,SRF-138,SRF-138,SRF-152,SRF-164,SRF-169,SRF-17,SRF-173,SRF-177,SRF-181,SRF-197,SRF-23,SRF-233,SRF-239,SRF-248,SRF-249,SRF-249,SRF-318,SRF-320,SRF-377,SRF-390,SRF-45,SRF-47,SRF-49,SRF-498,SRF-497,SRF-532,SRF-533,SRF-534,SRF-543,SRF-60,SRF-62,SRF-63

**actin binding**

Term information | Term lineage | External references | 1954 gene product associations

**Term Information**

Accession: GO:0003779

Ontology: molecular function

Synonyms: narrow: membrane associated actin binding

Definition: Interacting selectively and non-covalently with monomeric or multimeric forms of actin, including actin filaments. [source: GOCC:dt]

Comment: None

**b**

**Job description**

Test set: SRF.sigPeaks bed (556 genomic regions)

Background: UCSC genome browser (hg18)

Assembly: Human: NCBI build 36.1 (6/25/2006)

Associated genomic regions: Enrich plus extension (300.0 kb, 5.0 kb, 1.0 kb)

**Global table controls**

**Ontologies:**  GO  Phenotypic Data and Human Disease  Pathway Data  Gene Expression  Regulatory Motifs  Gene Families

**Columns:**  Rank  Hyper Rank  Enrichment P-Value  Enrichment Fold  Region Set Coverage  Hyper P-Value  Hyper Fold  Hyper Observed Gene Hits  Hyper Expected Gene Hits  Hyper Term Gene Coverage

**Results per-ontology**

**GO Molecular Function**

| Term Name                    | Enrichment Rank | Enrichment P-Value | Enrichment Fold | Region Set Coverage | Hyper Rank | Hyper P-Value | Hyper Fold | Hyper Observed Gene Hits | Hyper Expected Gene Hits | Hyper Term Gene Coverage |
|------------------------------|-----------------|--------------------|-----------------|---------------------|------------|---------------|------------|--------------------------|--------------------------|--------------------------|
| cytoskeletal protein binding | 3               | 4.6938e-5          | 1.8876          | 8.46%               | 3          | 3.9956e-5     | 1.9933     | 41                       | 6.14%                    | 9.26%                    |
| actin binding                | 6               | 5.2165e-5          | 2.0317          | 6.66%               | 6          | 3.2783e-5     | 2.2240     | 31                       | 3.88%                    | 10.38%                   |

**GO Cellular Component**

| Term Name                                | Enrichment Rank | Enrichment P-Value | Enrichment Fold | Region Set Coverage | Hyper Rank | Hyper P-Value | Hyper Fold | Hyper Observed Gene Hits | Hyper Expected Gene Hits | Hyper Term Gene Coverage |
|------------------------------------------|-----------------|--------------------|-----------------|---------------------|------------|---------------|------------|--------------------------|--------------------------|--------------------------|
| actin cytoskeleton                       | 2               | 6.9067e-9          | 3.0470          | 6.47%               | 2          | 2.2170e-7     | 2.8549     | 30                       | 3.76%                    | 13.22%                   |
| intracellular                            | 4               | 4.1896e-7          | 1.1219          | 82.37%              | 1          | 1.8624e-2     | 1.1396     | 554                      | 69.91%                   | 5.28%                    |
| intracellular organelle                  | 5               | 1.8216e-6          | 1.1524          | 72.86%              | 4          | 2.9523e-6     | 1.1620     | 456                      | 57.21%                   | 5.38%                    |
| organelle                                | 6               | 1.8922e-6          | 1.1522          | 72.86%              | 5          | 2.5896e-6     | 1.1625     | 456                      | 57.21%                   | 5.38%                    |
| intracellular part                       | 7               | 1.2584e-6          | 1.1234          | 80.04%              | 3          | 7.8912e-7     | 1.1399     | 532                      | 66.76%                   | 5.28%                    |
| cellular cytoskeleton                    | 9               | 4.6209e-6          | 5.9034          | 1.98%               | 10         | 8.0005e-6     | 4.7255     | 7                        | 0.88%                    | 21.86%                   |
| membrane bound organelle                 | 11              | 1.8915e-5          | 1.0221          | 13.89%              | 9          | 8.0882e-6     | 1.5484     | 69                       | 8.68%                    | 7.15%                    |
| intracellular membrane bounded organelle | 14              | 2.8811e-5          | 1.1467          | 66.55%              | 7          | 3.6204e-5     | 1.1571     | 405                      | 50.82%                   | 5.36%                    |
| membrane bounded organelle               | 15              | 2.4314e-5          | 1.1468          | 66.55%              | 8          | 3.7785e-5     | 1.1587     | 405                      | 50.82%                   | 5.36%                    |
| nucleus                                  | 16              | 5.5906e-5          | 1.1952          | 60.16%              | 6          | 4.4290e-5     | 1.2005     | 284                      | 36.63%                   | 5.79%                    |

**d**

**UCSC Genome Browser on Human Mar. 2006 Assembly (hg18)**

move <<< << < > >> >>> zoom in 1.5x 3x 10x base zoom out 1.5x 3x 10x

position/search chr16:161-88,827,254 jump clear size 88,827,254 bp. configure

chr16 (p13.3-q24.3) p13.3 p11.2 p11.2 16q21 23.1

Scale 20 Mb

chr16: 10000000 20000000 30000000 40000000 50000000 60000000 70000000 80000000

Regions in SRF.sigPeaks associated with GO:0003779 (actin binding)

SRF-318 SRF-93 SRF-48

All test regions in SRF.sigPeaks

SRF.sigPeaks

move start Click on a feature for details. Click or drag in the base position track to zoom in. Click move end

< 2.0 > grayblue bars on left for track options and descriptions. < 2.0 >

default tracks hide all manage custom tracks configure reverse refresh

collapse all Use drop-down controls below and press refresh to alter tracks displayed expand all

Tracks with lots of items will automatically be displayed in more compact modes.

Custom Tracks refresh

SRF.sigPeaks-GO:0003779- SRF.sigPeaks

GO:0003779- SRF.sigPeaks

pack dense

**Supplementary Figure 4:** Screenshots of the GREAT version 1.1.3 workflow. **(a)** The input screen where the user chooses an organism, inputs a set of *cis*-regulatory regions, and optionally alters the mapping of *cis*-regulatory regions to genes. **(b)** The main output screen displays enriched terms from twenty different ontologies. Global and per-table controls allow the user to set significance criteria and level of detail. Publication-grade HTML tables and tab-separated files for independent analysis or formatting are provided on the fly. **(c)** The individual term details screen, available by clicking on any term in any ontology, displays information related to the enrichment of the term including the *cis*-regulatory regions and genes that make this term enriched and an inset definition of the ontology term. **(d)** Clicking any listed *cis*-regulatory region in an individual term details screen opens a UCSC Genome Browser display focused on that region that includes custom tracks for the entire set of input *cis*-regulatory regions and for the subset that contributes to that particular term.



# SUPPLEMENTARY TABLES

**Supplementary Table 1:** Human and mouse ontologies currently supported by GREAT.

| Ontology                                | References |
|-----------------------------------------|------------|
| <b>Gene Ontology</b>                    |            |
| GO Molecular Function                   | ref. 1     |
| GO Biological Process                   | ref. 1     |
| GO Cellular Component                   | ref. 1     |
| <b>Phenotype Data and Human Disease</b> |            |
| Mouse Phenotype                         | refs. 2–4  |
| MSigDB Cancer Neighborhood*             | refs. 5,6  |
| MSigDB Cancer Modules*                  | refs. 5,7  |
| <b>Pathway Data</b>                     |            |
| PANTHER Pathway                         | ref. 8     |
| Pathway Commons                         | ref. 9     |
| BioCyc Pathway                          | ref. 10    |
| MSigDB Pathway                          | ref. 5     |
| <b>Gene Expression Data</b>             |            |
| MGI Expression: Detected                | refs. 3,11 |
| MGI Expression: Not Detected            | refs. 3,11 |
| MSigDB Perturbation                     | ref. 5     |
| <b>Regulatory Motifs</b>                |            |
| MSigDB Predicted Promoter Motifs        | ref. 5     |
| Transcription Factor Targets            | ref. 13    |
| MSigDB miRNA Motifs                     | ref. 5     |
| miRNA Targets                           | ref. 13    |
| <b>Gene Families</b>                    |            |
| InterPro                                | ref. 14    |
| TreeFam                                 | ref. 15    |
| HGNC Gene Families*                     | ref. 16    |

\* Ontology only supported in human.

**Supplementary Table 2:** Ontology contents for human.

| Ontology                         | Terms | Genes  | Direct associations | Download date  |
|----------------------------------|-------|--------|---------------------|----------------|
| GO Molecular Function            | 2,800 | 14,401 | 43,207              | March 5, 2009  |
| GO Biological Process            | 5,215 | 13,293 | 47,287              | March 5, 2009  |
| GO Cellular Component            | 834   | 15,210 | 39,984              | March 5, 2009  |
| Mouse Phenotype                  | 5,781 | 5,377  | 96,704              | April 22, 2009 |
| MSigDB Cancer Neighborhood       | 427   | 4,717  | 41,713              | March 11, 2009 |
| MSigDB Cancer Modules            | 456   | 7,918  | 47,511              | March 11, 2009 |
| PANTHER Pathway                  | 150   | 1,983  | 4,676               | March 9, 2009  |
| Pathway Commons                  | 1,253 | 3,921  | 52,505              | July 20, 2009  |
| BioCyc Pathway                   | 288   | 693    | 1,860               | March 13, 2009 |
| MSigDB Pathway                   | 706   | 6,473  | 25,280              | March 11, 2009 |
| MGI Expression: Detected         | 6,700 | 7,330  | 190,463             | March 23, 2009 |
| MGI Expression: Not Detected     | 3,079 | 4,812  | 82,621              | March 23, 2009 |
| MSigDB Perturbation              | 911   | 11,189 | 67,052              | March 11, 2009 |
| Transcription Factor Targets     | 19    | 5,375  | 9,980               | March 12, 2009 |
| MSigDB Predicted Promoter Motifs | 615   | 11,777 | 154,911             | March 11, 2009 |
| MSigDB miRNA Motifs              | 222   | 6,896  | 32,101              | March 11, 2009 |
| miRNA Targets                    | 9     | 1,095  | 1,199               | March 12, 2009 |
| InterPro                         | 6,587 | 15,228 | 53,630              | March 3, 2009  |
| TreeFam                          | 8,272 | 16,684 | 16,812              | March 3, 2009  |
| HGNC Gene Families               | 238   | 4,616  | 5,021               | March 6, 2009  |

**Supplementary Table 3:** Ontology contents for mouse.

| Ontology                         | Terms | Genes  | Direct associations | Download date  |
|----------------------------------|-------|--------|---------------------|----------------|
| GO Molecular Function            | 2,380 | 13,932 | 47,595              | March 23, 2009 |
| GO Biological Process            | 4,539 | 12,805 | 45,480              | March 23, 2009 |
| GO Cellular Component            | 686   | 14,548 | 34,827              | March 23, 2009 |
| Mouse Phenotype                  | 5,798 | 5,536  | 98,514              | April 22, 2009 |
| PANTHER Pathway                  | 149   | 1,759  | 4,023               | March 9, 2009  |
| Pathway Commons*                 | 83    | 116    | 206                 | July 20, 2009  |
| BioCyc Pathway                   | 275   | 888    | 2,109               | March 13, 2009 |
| MSigDB Pathway                   | 456   | 3,479  | 10,778              | March 11, 2009 |
| MGI Expression: Detected         | 6,701 | 7,730  | 194,545             | March 23, 2009 |
| MGI Expression: Not Detected     | 3,119 | 5,121  | 87,257              | March 23, 2009 |
| MSigDB Perturbation              | 248   | 7,419  | 23,073              | March 11, 2009 |
| Transcription Factor Targets     | 6     | 1,194  | 1,377               | March 12, 2009 |
| MSigDB Predicted Promoter Motifs | 615   | 9,117  | 127,459             | March 11, 2009 |
| MSigDB miRNA Motifs              | 222   | 5,948  | 28,369              | March 11, 2009 |
| miRNA Targets                    | 1     | 97     | 97                  | March 12, 2009 |
| InterPro                         | 6,281 | 16,096 | 51,140              | March 3, 2009  |
| TreeFam                          | 7,953 | 16,974 | 17,040              | March 3, 2009  |

\* The mouse Pathway Commons ontology contains considerably less data than its human counterpart because many input databases in Pathway Commons are specific to human pathways.

**Supplementary Table 4:** Comparison of several enrichment tools.

|            | Primary use                          | Ontologies supported | Web based  | Real-time response | Reference               |
|------------|--------------------------------------|----------------------|------------|--------------------|-------------------------|
| GREAT      | <b><i>Cis-regulatory regions</i></b> | <b>Many</b>          | <b>Yes</b> | <b>Yes</b>         | <i>This publication</i> |
| DAVID      | Gene sets                            | <b>Many</b>          | <b>Yes</b> | <b>Yes</b>         | ref. 21                 |
| Babelomics | Gene sets                            | <b>Many</b>          | <b>Yes</b> | No                 | ref. 55                 |
| OntoTools  | Gene sets                            | GO, chromosome       | <b>Yes</b> | <b>Yes</b>         | ref. 56                 |
| GOstat     | Gene sets                            | Only GO              | <b>Yes</b> | <b>Yes</b>         | ref. 57                 |
| GoMiner    | Gene sets                            | Only GO              | No         | N/A                | ref. 58                 |

**Supplementary Table 5:** Datasets analyzed by GREAT.

| Dataset                                            | Species             | Tissue               | References |
|----------------------------------------------------|---------------------|----------------------|------------|
| Serum Response Factor                              | <i>Homo sapiens</i> | Jurkat cells         | ref. 19    |
| Neuron-Restrictive Silencer Factor                 | <i>Homo sapiens</i> | Jurkat cells         | ref. 19    |
| GA-Binding Protein                                 | <i>Homo sapiens</i> | Jurkat cells         | ref. 19    |
| p300                                               | <i>Mus musculus</i> | Embryonic limb       | ref. 20    |
| p300                                               | <i>Mus musculus</i> | Embryonic forebrain  | ref. 20    |
| p300                                               | <i>Mus musculus</i> | Embryonic midbrain   | ref. 20    |
| p300                                               | <i>Mus musculus</i> | Embryonic stem cells | ref. 27    |
| Signal transducer and activator of transcription 3 | <i>Mus musculus</i> | Embryonic stem cells | ref. 27    |

**Supplementary Table 6: “Gene-based GREAT” enrichments of all genes that possess an SRF binding peak within 2 kb of its transcription start site. Shown are the top ten hypergeometric enriched terms at a false discovery rate of 0.05.**

| Ontology              | Term                                                                             | Hypergeometric Results |            |                    |
|-----------------------|----------------------------------------------------------------------------------|------------------------|------------|--------------------|
|                       | Name                                                                             | Raw P-Value            | FDR Q-Val  | Observed Gene Hits |
| GO Molecular Function | nucleic acid binding                                                             | 1.5983e-15             | 4.4752e-12 | 323                |
|                       | protein binding                                                                  | 7.1549e-15             | 1.0017e-11 | 644                |
|                       | RNA binding                                                                      | 1.5366e-12             | 1.4342e-9  | 97                 |
|                       | binding                                                                          | 1.4963e-8              | 1.0488e-5  | 918                |
|                       | structural constituent of ribosome                                               | 6.9336e-7              | 0.0004     | 28                 |
|                       | transcription repressor activity                                                 | 9.4062e-7              | 0.0004     | 39                 |
|                       | transcription factor binding                                                     | 1.6303e-6              | 0.0007     | 59                 |
|                       | transcription regulator activity                                                 | 4.7408e-5              | 0.0166     | 132                |
|                       | transcription cofactor activity                                                  | 4.7863e-5              | 0.0149     | 42                 |
|                       | transcription corepressor activity                                               | 0.0001                 | 0.0379     | 21                 |
| GO Biological Process | cellular macromolecule metabolic process                                         | 5.5441e-26             | 2.8912e-24 | 518                |
|                       | macromolecule metabolic process                                                  | 1.6637e-27             | 4.3390e-24 | 520                |
|                       | cellular biopolymer metabolic process                                            | 3.7180e-27             | 6.4632e-24 | 508                |
|                       | biopolymer metabolic process                                                     | 8.8278e-27             | 1.1509e-23 | 509                |
|                       | nucleobase, nucleoside, nucleotide and nucleic acid metabolic process            | 3.4330e-22             | 3.5807e-19 | 323                |
|                       | gene expression                                                                  | 2.5137e-21             | 2.1848e-18 | 281                |
|                       | cellular metabolic process                                                       | 7.4676e-21             | 5.5634e-18 | 593                |
|                       | primary metabolic process                                                        | 1.2033e-19             | 7.8442e-17 | 576                |
|                       | RNA metabolic process                                                            | 2.6534e-18             | 1.5375e-15 | 129                |
|                       | metabolic process                                                                | 4.5534e-18             | 2.3746e-15 | 621                |
| GO Cellular Component | intracellular                                                                    | 1.0175e-35             | 8.4863e-33 | 939                |
|                       | intracellular part                                                               | 3.6376e-34             | 1.5169e-31 | 908                |
|                       | intracellular organelle                                                          | 9.1566e-30             | 2.5455e-27 | 787                |
|                       | organelle                                                                        | 1.1070e-29             | 2.3081e-27 | 787                |
|                       | intracellular membrane-bounded organelle                                         | 1.8916e-28             | 2.8216e-26 | 719                |
|                       | membrane-bounded organelle                                                       | 1.9496e-28             | 2.7099e-26 | 719                |
|                       | nucleus                                                                          | 9.1791e-22             | 1.0936e-19 | 496                |
|                       | intracellular organelle part                                                     | 2.6415e-21             | 2.7538e-19 | 413                |
|                       | organelle part                                                                   | 3.3485e-21             | 3.1029e-19 | 414                |
|                       | nuclear part                                                                     | 1.3251e-20             | 1.1052e-18 | 186                |
| Pathway Commons       | RNA Polymerase II Transcription Initiation And Promoter Clearance                | 2.3080e-14             | 2.8919e-11 | 60                 |
|                       | Formation and Maturation of mRNA Transcript                                      | 2.3080e-14             | 2.8919e-11 | 60                 |
|                       | RNA Polymerase II Promoter Escape                                                | 2.3080e-14             | 2.8919e-11 | 60                 |
|                       | RNA Polymerase II Transcription Initiation                                       | 2.3080e-14             | 2.8919e-11 | 60                 |
|                       | RNA Polymerase II Transcription Pre-Initiation                                   | 2.3080e-14             | 2.8919e-11 | 60                 |
|                       | RNA Polymerase II Transcription                                                  | 2.3080e-14             | 2.8919e-11 | 60                 |
|                       | Gene Expression                                                                  | 2.7639e-14             | 4.9474e-12 | 68                 |
|                       | Elongation of Intron-Containing Transcripts and co-transcriptional mRNA splicing | 2.1048e-13             | 3.2966e-11 | 56                 |
|                       | Elongation and Processing of Capped Transcripts                                  | 2.1048e-13             | 3.2966e-11 | 56                 |
|                       | mRNA Capping                                                                     | 2.9039e-13             | 3.6385e-11 | 56                 |
| MSigDB Pathway        | RIBOSOMAL_PROTEINS                                                               | 1.2397e-7              | 8.7523e-5  | 24                 |
|                       | PGC related genes                                                                | 9.7838e-7              | 0.0003     | 57                 |
|                       | Genes involved in ribosome                                                       | 1.1507e-6              | 0.0003     | 18                 |
|                       | Genes involved in mRNA splicing                                                  | 0.0001                 | 0.0195     | 13                 |
|                       | Transcription factors enriched in fetal liver                                    | 0.0001                 | 0.0178     | 16                 |
|                       | Genes highly expressed in hepatocellular carcinoma with poor survival            | 0.0002                 | 0.0240     | 26                 |
|                       | Mitochondrial genes                                                              | 0.0002                 | 0.0223     | 52                 |
|                       | Tricarboxylic acid related genes                                                 | 0.0004                 | 0.0311     | 6                  |

  

| Ontology                     | Term                                                                                                                                                                                                                                                                         | Hypergeometric Results |            |                    |
|------------------------------|------------------------------------------------------------------------------------------------------------------------------------------------------------------------------------------------------------------------------------------------------------------------------|------------------------|------------|--------------------|
|                              | Name                                                                                                                                                                                                                                                                         | Raw P-Value            | FDR Q-Val  | Observed Gene Hits |
| Transcription Factor Targets | Targets of SRF, identified by ChIP-chip in different cell lines: Jurkat, T/G HA-VSMC, and Be(2)-C cells.                                                                                                                                                                     | 2.8894e-75             | 5.4898e-74 | 102                |
|                              | Targets of CREB, identified by ChIP-chip in HEK293T cells in three different time points after forskolin stimulation.                                                                                                                                                        | 3.4466e-64             | 3.2743e-63 | 372                |
|                              | Targets of ETS1, identified by ChIP-chip in Jurkat T-cells.                                                                                                                                                                                                                  | 5.0666e-39             | 3.2088e-38 | 206                |
|                              | Targets of YY1 identified by ChIP-chip.                                                                                                                                                                                                                                      | 5.6200e-18             | 2.6895e-17 | 110                |
|                              | Targets of HNF4alpha, identified by ChIP-chip in hepatocytes.                                                                                                                                                                                                                | 4.9191e-16             | 1.8692e-15 | 181                |
|                              | Targets of NRF1, identified by ChIP-chip in quiescent T98G cells.                                                                                                                                                                                                            | 1.3109e-7              | 4.1512e-7  | 82                 |
|                              | Genes that are bound by both E2F4 and p130 in three different growth arrest conditions, identified by ChIP-chip in T98G and U2OS cells under growth arrest.                                                                                                                  | 2.9623e-7              | 8.0405e-7  | 34                 |
|                              | Targets of estrogen receptor alpha, identified by ChIP-DSL in MCF-7 cells.                                                                                                                                                                                                   | 5.6159e-6              | 1.3338e-5  | 58                 |
|                              | Targets of Nanog, identified by ChIP-chip in embryonic stem cells.                                                                                                                                                                                                           | 0.0001                 | 0.0003     | 75                 |
|                              | Targets of Sox2, identified by ChIP-chip in embryonic stem cells.                                                                                                                                                                                                            | 0.0002                 | 0.0003     | 62                 |
| Predicted Promoter Motifs    | Genes with promoter regions [-2kb,2kb] around transcription start site containing the motif GGGCGGR which matches annotation for SP1: Sp1 transcription factor                                                                                                               | 4.4111e-29             | 2.7128e-26 | 346                |
|                              | Genes with promoter regions [-2kb,2kb] around transcription start site containing the motif SCGGAAAGY which matches annotation for ELK1: ELK1, member of ETS oncogene family                                                                                                 | 5.8988e-28             | 1.8139e-25 | 183                |
|                              | Genes with promoter regions [-2kb,2kb] around transcription start site containing the motif DCCWTATATGNCNWN which matches annotation for SRF: serum response factor (c-fos serum response element-binding transcription factor)                                              | 8.2882e-28             | 1.6991e-25 | 67                 |
|                              | Genes with promoter regions [-2kb,2kb] around transcription start site containing the motif ATGCCATATATGGWNNT which matches annotation for SRF: serum response factor (c-fos serum response element-binding transcription factor)                                            | 4.0786e-17             | 6.2708e-15 | 26                 |
|                              | Genes with promoter regions [-2kb,2kb] around transcription start site containing the motif CCAWATAWGGMNMNG which matches annotation for SRF: serum response factor (c-fos serum response element-binding transcription factor)                                              | 7.3770e-17             | 9.0737e-15 | 54                 |
|                              | Genes with promoter regions [-2kb,2kb] around transcription start site containing the motif GNCWATAWGGMN which matches annotation for SRF: serum response factor (c-fos serum response element-binding transcription factor)                                                 | 6.9116e-16             | 7.0844e-14 | 56                 |
|                              | Genes with promoter regions [-2kb,2kb] around transcription start site containing the motif SCCAWATAWGGMNMNMMNN which matches annotation for SRF: serum response factor (c-fos serum response element-binding transcription factor)                                          | 1.5217e-15             | 1.3369e-13 | 52                 |
|                              | Genes with promoter regions [-2kb,2kb] around transcription start site containing the motif VCCGGAAGNCR which matches annotation for GABPA: GA binding protein transcription factor, alpha subunit 60kDa<br> GABPB2: GA binding protein transcription factor, beta subunit 2 | 1.4177e-14             | 1.0899e-12 | 54                 |
|                              | Genes with promoter regions [-2kb,2kb] around transcription start site containing the motif RCGANGCGY which matches annotation for NRF1: nuclear respiratory factor 1                                                                                                        | 2.0319e-13             | 1.3885e-11 | 120                |
|                              | Genes with promoter regions [-2kb,2kb] around transcription start site containing the motif MGGAAAGTG which matches annotation for GABPA: GA binding protein transcription factor, alpha subunit 60kDa<br> GABPB2: GA binding protein transcription factor, beta subunit 2   | 4.7599e-13             | 2.9273e-11 | 105                |

**Supplementary Table 7: GREAT enrichments of SRF using the *basal plus extension* association rule with a basal regulatory region extending 5 kb upstream and 1 kb downstream of the transcription start site and a maximum extension of 50 kb. Shown are the top ten binomial enriched terms at a false discovery rate of 0.05 with a fold enrichment of at least two that are also significant by the hypergeometric test, using the highest-scoring SRF peaks anywhere in the genome (QuEST score > 1; n = 556).**

| Ontology                                                                                                                                                                                                                                                                 | Term                                                                                                                                                        | Binomial Results                                                                                                                                                                                                                |             |                 | Hypergeometric Results |                 |                    |
|--------------------------------------------------------------------------------------------------------------------------------------------------------------------------------------------------------------------------------------------------------------------------|-------------------------------------------------------------------------------------------------------------------------------------------------------------|---------------------------------------------------------------------------------------------------------------------------------------------------------------------------------------------------------------------------------|-------------|-----------------|------------------------|-----------------|--------------------|
|                                                                                                                                                                                                                                                                          |                                                                                                                                                             | Raw P Value                                                                                                                                                                                                                     | FDR Q.Val   | Fold Enrichment | FDR Q.Val              | Fold Enrichment | Observed Gene Hits |
| GO Cellular Component                                                                                                                                                                                                                                                    | intracellular                                                                                                                                               | 4.6225e-94                                                                                                                                                                                                                      | 1.2851e-91  | 2.7438          | 1.5475e-5              | 1.1840          | 390                |
|                                                                                                                                                                                                                                                                          | intracellular part                                                                                                                                          | 9.4136e-90                                                                                                                                                                                                                      | 1.9627e-87  | 2.7555          | 1.5326e-5              | 1.1691          | 376                |
|                                                                                                                                                                                                                                                                          | intracellular organelle                                                                                                                                     | 2.3290e-79                                                                                                                                                                                                                      | 3.6846e-77  | 2.8723          | 8.6753e-5              | 1.2159          | 323                |
|                                                                                                                                                                                                                                                                          | organelle                                                                                                                                                   | 2.5932e-79                                                                                                                                                                                                                      | 3.6046e-77  | 2.8711          | 6.8851e-5              | 1.2153          | 323                |
|                                                                                                                                                                                                                                                                          | intracellular membrane-bounded organelle                                                                                                                    | 2.5494e-69                                                                                                                                                                                                                      | 3.0374e-67  | 2.8753          | 0.0023                 | 1.2018          | 285                |
|                                                                                                                                                                                                                                                                          | membrane-bounded organelle                                                                                                                                  | 2.7954e-69                                                                                                                                                                                                                      | 2.9142e-67  | 2.8741          | 0.0020                 | 1.2013          | 285                |
|                                                                                                                                                                                                                                                                          | nucleus                                                                                                                                                     | 7.1757e-52                                                                                                                                                                                                                      | 6.6495e-50  | 3.1226          | 0.0028                 | 1.2803          | 197                |
|                                                                                                                                                                                                                                                                          | intracellular non-membrane-bounded organelle                                                                                                                | 2.7688e-26                                                                                                                                                                                                                      | 1.6494e-24  | 3.6145          | 0.0442                 | 1.4123          | 87                 |
|                                                                                                                                                                                                                                                                          | nuclear lumen                                                                                                                                               | 1.4675e-20                                                                                                                                                                                                                      | 7.6496e-19  | 4.3903          | 0.0292                 | 1.6571          | 50                 |
|                                                                                                                                                                                                                                                                          | actin cytoskeleton                                                                                                                                          | 1.8915e-13                                                                                                                                                                                                                      | 6.5729e-12  | 7.1454          | 0.0005                 | 3.0900          | 22                 |
|                                                                                                                                                                                                                                                                          | Pathway Commons                                                                                                                                             | Class I PI3K signaling events                                                                                                                                                                                                   | 1.1681e-16  | 1.4636e-13      | 7.9903                 | 0.0404          | 2.6793             |
| TRAIL signaling pathway                                                                                                                                                                                                                                                  |                                                                                                                                                             | 1.7751e-16                                                                                                                                                                                                                      | 1.1121e-13  | 6.8445          | 0.0362                 | 2.3809          | 23                 |
| Role of Calcineurin-dependent NFAT signaling in lymphocytes                                                                                                                                                                                                              |                                                                                                                                                             | 6.5036e-16                                                                                                                                                                                                                      | 2.7163e-13  | 13.9023         | 0.0393                 | 3.9854          | 11                 |
| Further platelet release                                                                                                                                                                                                                                                 |                                                                                                                                                             | 6.6573e-8                                                                                                                                                                                                                       | 1.8958e-6   | 20.9506         | 0.0564                 | 8.6955          | 6                  |
| MSigDB Pathway                                                                                                                                                                                                                                                           | Mouse genes associated with signal transduction through calcium, calcineurin, and NF-AT.                                                                    | 6.1451e-20                                                                                                                                                                                                                      | 4.3304e-17  | 15.4156         | 0.0141                 | 4.0241          | 13                 |
|                                                                                                                                                                                                                                                                          | Transcription factors enriched in fetal liver                                                                                                               | 5.2110e-17                                                                                                                                                                                                                      | 1.8395e-14  | 16.0163         | 0.0136                 | 4.3840          | 11                 |
| Transcription Factor Targets                                                                                                                                                                                                                                             | Targets of SRF, identified by ChIP-chip in different cell lines: Jurkat, T/G HA-VSMC, and Be(2)-C cells.                                                    | 1.1407e-110                                                                                                                                                                                                                     | 2.1674e-108 | 40.6389         | 6.8064e-75             | 15.4586         | 80                 |
|                                                                                                                                                                                                                                                                          | Targets of CREB, identified by ChIP-chip in HEK293T cells in three different time points after forskolin stimulation.                                       | 5.3922e-38                                                                                                                                                                                                                      | 5.1226e-37  | 4.0982          | 6.2784e-8              | 1.6796          | 117                |
|                                                                                                                                                                                                                                                                          | Targets of YY1 identified by ChIP-chip.                                                                                                                     | 1.3220e-19                                                                                                                                                                                                                      | 6.3726e-19  | 5.5997          | 0.0003                 | 1.9501          | 40                 |
|                                                                                                                                                                                                                                                                          | Targets of ETS1, identified by ChIP-chip in Jurkat T-cells.                                                                                                 | 1.9745e-17                                                                                                                                                                                                                      | 9.3789e-17  | 3.9291          | 0.0035                 | 1.5546          | 55                 |
|                                                                                                                                                                                                                                                                          | Targets of HNF4alpha, identified by ChIP-chip in hepatocytes.                                                                                               | 4.6146e-13                                                                                                                                                                                                                      | 1.7535e-12  | 3.0203          | 0.0395                 | 1.3106          | 50                 |
|                                                                                                                                                                                                                                                                          | Targets of NRF1, identified by ChIP-chip in quiescent T98G cells.                                                                                           | 1.0197e-11                                                                                                                                                                                                                      | 3.2291e-11  | 4.1047          | 0.0086                 | 1.6807          | 34                 |
|                                                                                                                                                                                                                                                                          | Genes that are bound by both E2F4 and p130 in three different growth arrest conditions, identified by ChIP-chip in T98G and U2OS cells under growth arrest. | 1.9151e-6                                                                                                                                                                                                                       | 4.0430e-6   | 5.2615          | 0.0168                 | 2.2165          | 13                 |
|                                                                                                                                                                                                                                                                          | Targets of HSF1, identified by ChIP-chip in HeLa cells under heat shock.                                                                                    | 3.4685e-6                                                                                                                                                                                                                       | 5.9738e-6   | 3.8622          | 0.0213                 | 1.8573          | 18                 |
|                                                                                                                                                                                                                                                                          | Targets of E2F4 that are expressed during cell cycle entry, identified by ChIP-chip in quiescent WI-38 cells.                                               | 2.3409e-5                                                                                                                                                                                                                       | 3.4211e-5   | 7.0802          | 0.0096                 | 3.2701          | 8                  |
|                                                                                                                                                                                                                                                                          | Genes whose expression peaks periodically in the G1/S cell cycle phase.                                                                                     | 5.4927e-5                                                                                                                                                                                                                       | 7.4543e-5   | 3.8085          | 0.0412                 | 1.8599          | 14                 |
|                                                                                                                                                                                                                                                                          | Predicted Promoter Motifs                                                                                                                                   | Genes with promoter regions [-2kb,2kb] around transcription start site containing the motif DCCWTATATGGNCWN which matches annotation for SRF: serum response factor (c-fos serum response element-binding transcription factor) | 2.3053e-60  | 1.4178e-57      | 20.7384                | 8.5263e-26      | 7.5020             |
| Genes with promoter regions [-2kb,2kb] around transcription start site containing the motif GNCCAWATAWGGMN which matches annotation for SRF: serum response factor (c-fos serum response element-binding transcription factor)                                           |                                                                                                                                                             | 2.9199e-48                                                                                                                                                                                                                      | 8.9789e-46  | 15.8078         | 6.4411e-17             | 5.4695          | 41                 |
| Genes with promoter regions [-2kb,2kb] around transcription start site containing the motif CCAWATAWGGMNMNS which matches annotation for SRF: serum response factor (c-fos serum response element-binding transcription factor)                                          |                                                                                                                                                             | 4.6422e-48                                                                                                                                                                                                                      | 9.5164e-46  | 16.8717         | 1.0734e-16             | 5.8105          | 39                 |
| Genes with promoter regions [-2kb,2kb] around transcription start site containing the motif SCCAWATAWGGMNMNNN which matches annotation for SRF: serum response factor (c-fos serum response element-binding transcription factor)                                        |                                                                                                                                                             | 8.9504e-48                                                                                                                                                                                                                      | 1.3761e-45  | 16.6604         | 1.0734e-16             | 5.8105          | 39                 |
| Genes with promoter regions [-2kb,2kb] around transcription start site containing the motif GCGCGGR which matches annotation for SP1: Sp1 transcription factor                                                                                                           |                                                                                                                                                             | 1.4863e-40                                                                                                                                                                                                                      | 1.8201e-30  | 3.6955          | 5.5235e-6              | 1.5411          | 135                |
| Genes with promoter regions [-2kb,2kb] around transcription start site containing the motif ATGCCATATATGGWNTT which matches annotation for SRF: serum response factor (c-fos serum response element-binding transcription factor)                                        |                                                                                                                                                             | 7.0794e-39                                                                                                                                                                                                                      | 7.2564e-37  | 44.4133         | 2.3170e-15             | 12.5033         | 20                 |
| Genes with promoter regions [-2kb,2kb] around transcription start site containing the motif SCGGAAGY which matches annotation for ELK1, ELK1, member of ETS oncogene family                                                                                              |                                                                                                                                                             | 3.6138e-29                                                                                                                                                                                                                      | 3.1750e-27  | 5.1858          | 5.1486e-6              | 1.9573          | 69                 |
| Genes with promoter regions [-2kb,2kb] around transcription start site containing the motif CCAWYNAAGG which matches annotation for SRF: serum response factor (c-fos serum response element-binding transcription factor)                                               |                                                                                                                                                             | 3.6746e-26                                                                                                                                                                                                                      | 2.8249e-24  | 20.1757         | 1.4221e-7              | 6.2301          | 17                 |
| Genes with promoter regions [-2kb,2kb] around transcription start site containing the motif MGAAGTG which matches annotation for GABPA: GA binding protein transcription factor, alpha subunit 60kDa<br> GADPB2: GA binding protein transcription factor, beta subunit 2 |                                                                                                                                                             | 6.1914e-20                                                                                                                                                                                                                      | 3.8077e-18  | 5.1783          | 0.0041                 | 1.8650          | 42                 |
| Genes with promoter regions [-2kb,2kb] around transcription start site containing the motif GTGACCY which matches annotation for E4F1: E4F transcription factor 1                                                                                                        |                                                                                                                                                             | 1.4545e-16                                                                                                                                                                                                                      | 7.4545e-15  | 4.8373          | 0.0226                 | 1.7798          | 35                 |
| TreeFam                                                                                                                                                                                                                                                                  |                                                                                                                                                             | Early growth response protein                                                                                                                                                                                                   | 4.2561e-17  | 3.5207e-13      | 141.1322               | 0.0086          | 25.5066            |

**Supplementary Table 8:** GREAT enrichments of SRF using the *two nearest genes* association rule with a maximum extension of 1 Mb. Shown are the top ten binomial enriched terms at a false discovery rate of 0.05 with a fold enrichment of at least two that are also significant by the hypergeometric test, using the highest-scoring SRF peaks anywhere in the genome (QuEST score > 1; n = 556).

| Ontology                                                                                                                                                    | Term                                                                                                                                                                                                                                                                          | Binomial Results                              |            |                 | Hypergeometric Results |                 |                    |
|-------------------------------------------------------------------------------------------------------------------------------------------------------------|-------------------------------------------------------------------------------------------------------------------------------------------------------------------------------------------------------------------------------------------------------------------------------|-----------------------------------------------|------------|-----------------|------------------------|-----------------|--------------------|
|                                                                                                                                                             | Name                                                                                                                                                                                                                                                                          | Raw P-Value                                   | FDR Q-Val  | Fold Enrichment | FDR Q-Val              | Fold Enrichment | Observed Gene Hits |
| GO Molecular Function                                                                                                                                       | actin filament binding                                                                                                                                                                                                                                                        | 5.7178e-13                                    | 1.6010e-9  | 8.7231          | 0.0078                 | 4.7469          | 11                 |
|                                                                                                                                                             | cytoskeletal protein binding                                                                                                                                                                                                                                                  | 1.1226e-11                                    | 1.5717e-8  | 2.5415          | 0.0057                 | 1.9755          | 52                 |
|                                                                                                                                                             | actin binding                                                                                                                                                                                                                                                                 | 4.7472e-11                                    | 4.4307e-8  | 2.8115          | 0.0053                 | 2.1806          | 39                 |
| GO Cellular Component Pathway Commons                                                                                                                       | actin cytoskeleton                                                                                                                                                                                                                                                            | 3.0321e-16                                    | 2.5288e-13 | 4.0765          | 3.3562e-6              | 2.7432          | 37                 |
|                                                                                                                                                             | TRAIL signaling pathway                                                                                                                                                                                                                                                       | 8.4074e-12                                    | 1.0534e-8  | 2.9916          | 0.0002                 | 2.3496          | 43                 |
|                                                                                                                                                             | Class I PI3K signaling events                                                                                                                                                                                                                                                 | 6.3320e-11                                    | 3.9670e-8  | 3.1776          | 0.0001                 | 2.5457          | 36                 |
|                                                                                                                                                             | TNF receptor signaling pathway                                                                                                                                                                                                                                                | 1.5415e-8                                     | 4.8288e-6  | 2.6731          | 0.0497                 | 1.9913          | 31                 |
|                                                                                                                                                             | TCR signaling in naive CD8+ T cells                                                                                                                                                                                                                                           | 1.3913e-7                                     | 6.4568e-6  | 3.7078          | 0.0501                 | 2.5036          | 18                 |
|                                                                                                                                                             | Glypican 1 network                                                                                                                                                                                                                                                            | 1.3941e-7                                     | 6.2385e-6  | 2.1469          | 0.0135                 | 1.8477          | 46                 |
|                                                                                                                                                             | Glypican pathway                                                                                                                                                                                                                                                              | 1.8834e-7                                     | 6.9410e-6  | 2.0445          | 0.0150                 | 1.8205          | 49                 |
|                                                                                                                                                             | Further platelet releasate                                                                                                                                                                                                                                                    | 1.7813e-6                                     | 4.6500e-5  | 10.1373         | 0.0414                 | 5.3550          | 7                  |
|                                                                                                                                                             | IRS-mediated signalling                                                                                                                                                                                                                                                       | 0.0034                                        | 0.0342     | 3.3112          | 0.0476                 | 3.9860          | 9                  |
|                                                                                                                                                             | MSigDB Pathway Transcription Factor Targets                                                                                                                                                                                                                                   | Transcription factors enriched in fetal liver | 3.4283e-9  | 8.0679e-7       | 4.5621                 | 0.0450          | 3.1556             |
| Targets of SRF, identified by ChIP-chip in different cell lines: Jurkat, T/G HA-VSMC, and Be(2)-C cells.                                                    |                                                                                                                                                                                                                                                                               | 1.8284e-76                                    | 3.4740e-75 | 13.1009         | 3.8646e-56             | 8.4660          | 83                 |
| Targets of NRF1, identified by ChIP-chip in quiescent T98G cells.                                                                                           |                                                                                                                                                                                                                                                                               | 2.3209e-7                                     | 8.8194e-7  | 2.0783          | 0.0177                 | 1.4612          | 56                 |
| Genes that are bound by both E2F4 and p130 in three different growth arrest conditions, identified by ChIP-chip in T98G and U2OS cells under growth arrest. |                                                                                                                                                                                                                                                                               | 0.0025                                        | 0.0079     | 2.0895          | 0.0497                 | 1.7100          | 19                 |
| Targets of E2F4 that are expressed during cell cycle entry, identified by ChIP-chip in quiescent WI-38 cells.                                               |                                                                                                                                                                                                                                                                               | 0.0211                                        | 0.0334     | 2.0499          | 0.0456                 | 2.1577          | 10                 |
| Predicted Promoter Motifs                                                                                                                                   | Genes with promoter regions [-2kb,2kb] around transcription start site containing the motif ATGCCCATATATGGWNNT which matches annotation for SRF: serum response factor (c-fos serum response element-binding transcription factor)                                            | 5.3652e-29                                    | 3.2996e-26 | 15.5920         | 2.4284e-13             | 7.5900          | 23                 |
|                                                                                                                                                             | Genes with promoter regions [-2kb,2kb] around transcription start site containing the motif DCCWTATATGGNCVWN which matches annotation for SRF: serum response factor (c-fos serum response element-binding transcription factor)                                              | 1.1270e-28                                    | 3.4656e-26 | 5.0865          | 3.0902e-19             | 4.5375          | 55                 |
|                                                                                                                                                             | Genes with promoter regions [-2kb,2kb] around transcription start site containing the motif SCCAWATAWGGMNMNNNN which matches annotation for SRF: serum response factor (c-fos serum response element-binding transcription factor)                                            | 4.5860e-23                                    | 9.3603e-21 | 4.2901          | 4.3472e-14             | 3.8536          | 49                 |
|                                                                                                                                                             | Genes with promoter regions [-2kb,2kb] around transcription start site containing the motif CCAWATAWGGMNMING which matches annotation for SRF: serum response factor (c-fos serum response element-binding transcription factor)                                              | 1.0032e-22                                    | 1.5424e-20 | 4.1672          | 4.3472e-14             | 3.8536          | 49                 |
|                                                                                                                                                             | Genes with promoter regions [-2kb,2kb] around transcription start site containing the motif GNCCAWATAWGGMN which matches annotation for SRF: serum response factor (c-fos serum response element-binding transcription factor)                                                | 5.9134e-20                                    | 7.2734e-18 | 3.6911          | 1.1667e-13             | 3.5913          | 51                 |
|                                                                                                                                                             | Genes with promoter regions [-2kb,2kb] around transcription start site containing the motif SCGGAAGY which matches annotation for ELK1: ELK1, member of ETS oncogene family                                                                                                   | 1.4762e-13                                    | 1.5131e-11 | 2.1970          | 0.0175                 | 1.4225          | 95                 |
|                                                                                                                                                             | Genes with promoter regions [-2kb,2kb] around transcription start site containing the motif CCAWNAAGG which matches annotation for SRF: serum response factor (c-fos serum response element-binding transcription factor)                                                     | 2.0856e-13                                    | 1.8148e-11 | 5.0535          | 2.6439e-6              | 4.0624          | 21                 |
|                                                                                                                                                             | Genes with promoter regions [-2kb,2kb] around transcription start site containing the motif VCCGGAAGNGCR which matches annotation for GABPA: GA binding protein transcription factor, alpha subunit 60kDa<br> GABPB2: GA binding protein transcription factor, beta subunit 2 | 4.6931e-10                                    | 3.2069e-8  | 3.8196          | 0.0278                 | 1.9635          | 28                 |
|                                                                                                                                                             | Genes with promoter regions [-2kb,2kb] around transcription start site containing motif NGGGACTTTCCA. Motif does not match any known transcription factor                                                                                                                     | 1.6595e-6                                     | 8.5051e-5  | 2.4198          | 0.0107                 | 2.0441          | 30                 |
|                                                                                                                                                             | Genes with promoter regions [-2kb,2kb] around transcription start site containing the motif WTGCGTGGGCGK which matches annotation for EGR1: early growth response 1                                                                                                           | 3.4186e-6                                     | 0.0002     | 2.3093          | 0.0341                 | 1.8925          | 28                 |
|                                                                                                                                                             | FOSL2/JDP2/FOS/FOSL1/FOSB/ATF3                                                                                                                                                                                                                                                | 1.1291e-8                                     | 3.1134e-5  | 27.2523         | 0.0346                 | 14.0249         | 5                  |

**Supplementary Table 9:** GREAT enrichments of SRF using the *single nearest gene* association rule with a maximum extension of 1 Mb. Shown are the top ten binomial enriched terms at a false discovery rate of 0.05 with a fold enrichment of at least two that are also significant by the hypergeometric test, using the highest-scoring SRF peaks anywhere in the genome (QuEST score > 1; n = 556).

| Ontology                       | Term                                                                                                                                                                                                                                                                          | Binomial Results |            |                 | Hypergeometric Results |                 |                    |
|--------------------------------|-------------------------------------------------------------------------------------------------------------------------------------------------------------------------------------------------------------------------------------------------------------------------------|------------------|------------|-----------------|------------------------|-----------------|--------------------|
|                                | Name                                                                                                                                                                                                                                                                          | Raw P-Value      | FDR Q-Val  | Fold Enrichment | FDR Q-Val              | Fold Enrichment | Observed Gene Hits |
| GO Cellular Component          | nuclear lumen                                                                                                                                                                                                                                                                 | 2.3328e-8        | 1.9455e-6  | 2.1917          | 0.0147                 | 1.6980          | 50                 |
|                                | actin cytoskeleton                                                                                                                                                                                                                                                            | 3.1098e-6        | 0.0001     | 3.2884          | 0.0078                 | 2.7345          | 19                 |
|                                | cytosolic large ribosomal subunit                                                                                                                                                                                                                                             | 1.0174e-5        | 0.0004     | 9.7434          | 0.0104                 | 6.1808          | 7                  |
|                                | cortical cytoskeleton                                                                                                                                                                                                                                                         | 1.3415e-5        | 0.0005     | 7.6613          | 0.0279                 | 6.1256          | 6                  |
| Pathway Commons MSigDB Pathway | Further platelet releasate                                                                                                                                                                                                                                                    | 3.6552e-6        | 0.0001     | 15.2060         | 0.0492                 | 8.9100          | 6                  |
|                                | Transcription factors enriched in fetal liver                                                                                                                                                                                                                                 | 8.6945e-10       | 3.0691e-7  | 6.4954          | 0.0218                 | 4.4921          | 11                 |
| Transcription Factor Targets   | Targets of SRF, identified by ChIP-chip in different cell lines: Jurkat, T/G HA-VSMC, and Be(2)-C cells.                                                                                                                                                                      | 6.5241e-79       | 1.2396e-77 | 19.2536         | 1.0002e-66             | 14.6519         | 74                 |
|                                | Targets of YY1 identified by ChIP-chip.                                                                                                                                                                                                                                       | 6.2083e-9        | 3.9319e-8  | 2.9484          | 0.0032                 | 1.7983          | 36                 |
|                                | Targets of ETS1, identified by ChIP-chip in Jurkat T-cells.                                                                                                                                                                                                                   | 5.7312e-7        | 2.7223e-6  | 2.1033          | 0.0078                 | 1.5061          | 52                 |
|                                | Targets of NRF1, identified by ChIP-chip in quiescent T98G cells.                                                                                                                                                                                                             | 1.1505e-5        | 4.3720e-5  | 2.2756          | 0.0140                 | 1.6208          | 32                 |
|                                | Genes that are bound by both E2F4 and p130 in three different growth arrest conditions, identified by ChIP-chip in T98G and U2OS cells under growth arrest.                                                                                                                   | 0.0005           | 0.0016     | 2.7446          | 0.0031                 | 2.6206          | 15                 |
|                                | Targets of HSF1, identified by ChIP-chip in HeLa cells under heat shock.                                                                                                                                                                                                      | 0.0021           | 0.0050     | 2.1214          | 0.0168                 | 1.9031          | 18                 |
| Predicted Promoter Motifs      | Genes with promoter regions [-2kb,2kb] around transcription start site containing the motif DCCVATATATGNCVWN which matches annotation for SRF: serum response factor (c-fos serum response element-binding transcription factor)                                              | 7.1743e-33       | 4.4122e-30 | 7.4699          | 3.0452e-23             | 7.2066          | 45                 |
|                                | Genes with promoter regions [-2kb,2kb] around transcription start site containing the motif ATGCCCATATATGGWNNT which matches annotation for SRF: serum response factor (c-fos serum response element-binding transcription factor)                                            | 1.3569e-29       | 4.1725e-27 | 25.0321         | 5.6216e-13             | 11.5305         | 18                 |
|                                | Genes with promoter regions [-2kb,2kb] around transcription start site containing the motif SCCAWATAWGGMNMNNNN which matches annotation for SRF: serum response factor (c-fos serum response element-binding transcription factor)                                            | 1.0567e-24       | 2.1663e-22 | 5.9846          | 2.5024e-15             | 5.6485          | 37                 |
|                                | Genes with promoter regions [-2kb,2kb] around transcription start site containing the motif CCAWATAWGGMNMNG which matches annotation for SRF: serum response factor (c-fos serum response element-binding transcription factor)                                               | 1.5687e-22       | 2.4120e-20 | 5.4667          | 8.7953e-15             | 5.4969          | 36                 |
|                                | Genes with promoter regions [-2kb,2kb] around transcription start site containing the motif GNCCAWATAWGGMN which matches annotation for SRF: serum response factor (c-fos serum response element-binding transcription factor)                                                | 1.2218e-20       | 1.5028e-18 | 4.8411          | 1.6842e-15             | 5.3311          | 39                 |
|                                | Genes with promoter regions [-2kb,2kb] around transcription start site containing the motif SCGGAAGY which matches annotation for ELK1: ELK1, member of ETS oncogene family                                                                                                   | 9.2830e-17       | 9.5151e-15 | 2.9964          | 7.4345e-5              | 1.8602          | 64                 |
|                                | Genes with promoter regions [-2kb,2kb] around transcription start site containing the motif VCCGGAAGNGCR which matches annotation for GABPA: GA binding protein transcription factor, alpha subunit 60kDa<br> GABPB2: GA binding protein transcription factor, beta subunit 2 | 2.0867e-14       | 1.8333e-12 | 6.4613          | 2.9210e-5              | 3.2670          | 24                 |
|                                | Genes with promoter regions [-2kb,2kb] around transcription start site containing the motif CCAWWNAAGG which matches annotation for SRF: serum response factor (c-fos serum response element-binding transcription factor)                                                    | 5.0566e-14       | 3.8873e-12 | 7.1981          | 9.8285e-8              | 6.3838          | 17                 |
|                                | Genes with promoter regions [-2kb,2kb] around transcription start site containing the motif MGGAAAGTG which matches annotation for GABPA: GA binding protein transcription factor, alpha subunit 60kDa<br> GABPB2: GA binding protein transcription factor, beta subunit 2    | 2.4939e-10       | 1.7042e-8  | 2.6804          | 0.0006                 | 2.0021          | 44                 |
|                                | Genes with promoter regions [-2kb,2kb] around transcription start site containing the motif ACCGGAAGNG which matches annotation for NFE2L2: nuclear factor (erythroid-derived 2)-like 2                                                                                       | 1.1150e-6        | 5.7143e-5  | 3.9979          | 0.0260                 | 2.3522          | 18                 |
| TreeFam                        | Early growth response protein                                                                                                                                                                                                                                                 | 6.4549e-15       | 5.3395e-11 | 80.3988         | 0.0350                 | 26.1359         | 4                  |

**Supplementary Table 10:** Enrichments for regions bound by p300 in mouse limb. **(a)** DAVID gene-based enrichments of genes with proximal p300 binding events. **(b)** GREAT *cis*-regulatory element enrichments for all regions bound by p300.

**a**

**DAVID Gene-based Enrichments of p300 Binding Peaks in Mouse Limb**

| Annotation Cluster 1                     | Enrichment Score: 6.31                     | RT | Count | P Value | Benjamini |
|------------------------------------------|--------------------------------------------|----|-------|---------|-----------|
| <input type="checkbox"/> SP_PIR_KEYWORDS | Transcription regulation                   | RT | 43    | 4.6E-10 | 4.0E-7    |
| <input type="checkbox"/> SP_PIR_KEYWORDS | dna-binding                                | RT | 44    | 6.2E-10 | 2.7E-7    |
| <input type="checkbox"/> SP_PIR_KEYWORDS | Transcription                              | RT | 43    | 8.0E-10 | 2.3E-7    |
| <input type="checkbox"/> SP_PIR_KEYWORDS | nucleus                                    | RT | 74    | 1.5E-9  | 3.3E-7    |
| <input type="checkbox"/> GOTERM_CC_ALL   | nucleus                                    | RT | 86    | 3.7E-9  | 2.9E-6    |
| <input type="checkbox"/> GOTERM_MF_ALL   | transcription regulator activity           | RT | 41    | 6.4E-9  | 1.7E-5    |
| <input type="checkbox"/> GOTERM_BP_ALL   | regulation of cellular process             | RT | 80    | 1.6E-8  | 8.2E-5    |
| <input type="checkbox"/> GOTERM_BP_ALL   | regulation of biological process           | RT | 84    | 4.9E-8  | 1.3E-4    |
| <input type="checkbox"/> GOTERM_BP_ALL   | regulation of transcription, DNA-dependent | RT | 55    | 5.0E-8  | 8.7E-5    |
| <input type="checkbox"/> GOTERM_MF_ALL   | DNA binding                                | RT | 52    | 5.4E-8  | 7.3E-5    |
| Annotation Cluster 2                     | Enrichment Score: 3.4                      | RT | Count | P Value | Benjamini |
| <input type="checkbox"/> GOTERM_MF_ALL   | transcription regulator activity           | RT | 41    | 6.4E-9  | 1.7E-5    |
| <input type="checkbox"/> GOTERM_MF_ALL   | transcription factor activity              | RT | 30    | 9.2E-7  | 8.3E-4    |
| <input type="checkbox"/> GOTERM_BP_ALL   | pattern specification process              | RT | 12    | 1.2E-4  | 2.6E-2    |
| <input type="checkbox"/> GOTERM_CC_ALL   | nucleoplasm part                           | RT | 19    | 1.3E-4  | 1.2E-2    |
| <input type="checkbox"/> GOTERM_MF_ALL   | sequence-specific DNA binding              | RT | 17    | 1.9E-4  | 7.2E-2    |
| <input type="checkbox"/> GOTERM_CC_ALL   | transcription factor complex               | RT | 16    | 2.0E-4  | 1.7E-2    |
| <input type="checkbox"/> GOTERM_CC_ALL   | protein complex                            | RT | 39    | 2.1E-4  | 1.7E-2    |
| <input type="checkbox"/> SP_PIR_KEYWORDS | Developmental protein                      | RT | 20    | 2.7E-4  | 3.3E-2    |
| <input type="checkbox"/> GOTERM_CC_ALL   | nucleoplasm                                | RT | 19    | 2.8E-4  | 2.0E-2    |
| Annotation Cluster 3                     | Enrichment Score: 3.08                     | RT | Count | P Value | Benjamini |
| <input type="checkbox"/> GOTERM_BP_ALL   | organ morphogenesis                        | RT | 21    | 4.1E-6  | 1.1E-3    |
| <input type="checkbox"/> GOTERM_BP_ALL   | anatomical structure morphogenesis         | RT | 31    | 5.4E-5  | 1.3E-2    |
| <input type="checkbox"/> GOTERM_BP_ALL   | organ development                          | RT | 34    | 9.9E-5  | 2.2E-2    |

**b**

**GREAT Enrichments of p300 Binding Peaks in Mouse Limb**

| Ontology                 | Term                                                                 | Binomial Results |            |                 | Hypergeometric Results |                 |                    | Distal Binding%<br>(≥ 10 kb from nearest TSS) |
|--------------------------|----------------------------------------------------------------------|------------------|------------|-----------------|------------------------|-----------------|--------------------|-----------------------------------------------|
|                          |                                                                      | Raw P-Value      | FDR Q-Val  | Fold Enrichment | FDR Q-Val              | Fold Enrichment | Observed Gene Hits |                                               |
| GO Molecular Function    | transcription repressor activity                                     | 5.1566e-14       | 2.0456e-11 | 2.2015          | 0.0014                 | 2.0428          | 41                 | 87.4%                                         |
|                          | extracellular matrix structural constituent                          | 0.0004           | 0.0240     | 2.6247          | 0.0133                 | 3.6537          | 11                 | 94.1%                                         |
| GO Biological Process    | embryonic limb morphogenesis                                         | 1.9792e-30       | 1.1230e-27 | 3.8271          | 9.8517e-16             | 4.0766          | 44                 | 79.2%                                         |
|                          | limb morphogenesis                                                   | 9.6264e-29       | 2.9129e-26 | 3.5370          | 5.6001e-16             | 3.8651          | 48                 | 78.2%                                         |
|                          | embryonic morphogenesis                                              | 1.7374e-28       | 4.9287e-26 | 2.2764          | 1.6696e-16             | 2.5054          | 99                 | 85.3%                                         |
|                          | limb development                                                     | 3.0309e-28       | 8.0925e-26 | 3.3920          | 1.3037e-16             | 3.8698          | 50                 | 78.9%                                         |
|                          | skeletal system development                                          | 3.4240e-26       | 5.5506e-24 | 2.4141          | 8.4605e-20             | 2.8874          | 92                 | 80.4%                                         |
|                          | negative regulation of transcription, DNA-dependent                  | 1.8616e-21       | 1.9651e-19 | 2.2922          | 1.4514e-7              | 2.1258          | 64                 | 82.6%                                         |
|                          | negative regulation of RNA metabolic process                         | 2.3064e-21       | 2.3792e-19 | 2.2670          | 1.9380e-7              | 2.1062          | 64                 | 82.6%                                         |
|                          | negative regulation of transcription from RNA polymerase II promoter | 5.0111e-21       | 4.8394e-19 | 2.4287          | 1.8092e-8              | 2.3666          | 57                 | 80.9%                                         |
|                          | negative regulation of gene expression                               | 6.3047e-19       | 5.1102e-17 | 2.0679          | 4.8986e-6              | 2.0258          | 77                 | 83.0%                                         |
|                          | negative regulation of transcription                                 | 7.2652e-19       | 5.6013e-17 | 2.0911          | 1.3078e-7              | 2.0206          | 73                 | 82.5%                                         |
| Mouse Phenotype          | abnormal craniofacial morphology                                     | 2.8489e-52       | 8.2588e-49 | 2.0985          | 3.0174e-32             | 2.4142          | 202                | 90.2%                                         |
|                          | abnormal axial skeleton morphology                                   | 2.7970e-48       | 3.2434e-45 | 2.1069          | 3.4770e-32             | 2.4596          | 195                | 86.0%                                         |
|                          | abnormal limbs/digits/tail morphology                                | 3.3965e-46       | 2.8133e-43 | 2.1821          | 3.2913e-30             | 2.5099          | 176                | 86.8%                                         |
|                          | abnormal skull morphology                                            | 7.5980e-44       | 5.5086e-41 | 2.3680          | 2.0707e-29             | 2.9252          | 131                | 88.4%                                         |
|                          | abnormal craniofacial bone morphology                                | 8.2626e-43       | 5.3360e-40 | 2.3048          | 6.0949e-30             | 2.6911          | 136                | 88.3%                                         |
|                          | abnormal limb morphology                                             | 1.2698e-41       | 7.4781e-39 | 2.3530          | 2.9027e-26             | 2.7644          | 129                | 87.2%                                         |
|                          | abnormal paw/hand/foot morphology                                    | 1.7751e-38       | 8.5767e-36 | 2.8495          | 7.1707e-22             | 3.2194          | 84                 | 88.0%                                         |
|                          | abnormal digit morphology                                            | 6.3264e-37       | 2.4454e-34 | 2.9651          | 5.4602e-20             | 3.3565          | 72                 | 87.2%                                         |
|                          | abnormal appendicular skeleton morphology                            | 1.7529e-36       | 6.3520e-34 | 2.3454          | 6.1182e-25             | 2.6150          | 119                | 84.0%                                         |
|                          | abnormal head morphology                                             | 7.1868e-36       | 2.4511e-33 | 2.1002          | 3.8552e-23             | 2.4321          | 144                | 89.1%                                         |
| PANTHER pathway          | TGF-beta signaling pathway                                           | 4.6289e-5        | 0.0034     | 2.0042          | 0.0164                 | 2.2456          | 20                 | 85.0%                                         |
| MGI Expression: Detected | TS19_limb                                                            | 3.3410e-52       | 7.4626e-49 | 2.7930          | 1.4719e-36             | 3.6576          | 117                | 86.3%                                         |
|                          | TS19_forelimb bud                                                    | 6.8017e-41       | 5.0643e-38 | 2.9673          | 4.6454e-32             | 4.1550          | 86                 | 83.5%                                         |
|                          | TS22_upper jaw                                                       | 1.8641e-38       | 7.9650e-36 | 2.1906          | 5.7007e-17             | 2.1967          | 135                | 87.7%                                         |
|                          | TS20_limb                                                            | 2.4317e-38       | 1.0663e-35 | 2.3683          | 2.0866e-30             | 3.1727          | 119                | 87.6%                                         |
|                          | TS19_hindlimb bud                                                    | 6.5820e-37       | 2.4503e-34 | 3.1744          | 5.2268e-23             | 4.0831          | 63                 | 87.2%                                         |
|                          | TS20_forelimb                                                        | 2.1505e-34       | 4.9691e-32 | 2.7208          | 6.9945e-24             | 3.4903          | 81                 | 84.9%                                         |
|                          | TS17_limb                                                            | 3.7256e-33       | 7.8017e-31 | 2.2171          | 1.8401e-26             | 2.6509          | 139                | 86.1%                                         |
|                          | TS22_palatal shelf                                                   | 3.5366e-32       | 6.9701e-30 | 2.1655          | 4.3955e-12             | 2.0107          | 113                | 87.1%                                         |
|                          | TS17_hindlimb bud                                                    | 2.0087e-31       | 3.5421e-29 | 3.1294          | 1.9178e-22             | 4.3275          | 57                 | 86.6%                                         |
|                          | TS21_limb                                                            | 9.0320e-31       | 1.5131e-28 | 2.5063          | 9.2670e-27             | 3.4323          | 93                 | 84.3%                                         |
| InterPro                 | MAD homology 1, Dwarf-in-type                                        | 1.7109e-9        | 1.1940e-6  | 4.5958          | 0.0295                 | 5.3145          | 8                  | 95.8%                                         |



**Supplementary Table 11:** “Gene-based GREAT” enrichments of all genes that possess a p300 limb binding peak within 2 kb of its transcription start site. Shown are the top ten hypergeometric enriched terms at a false discovery rate of 0.05.

| Ontology                 | Term                                                                                                          | Hypergeometric Results |           |                    |
|--------------------------|---------------------------------------------------------------------------------------------------------------|------------------------|-----------|--------------------|
|                          | Name                                                                                                          | Raw P-Value            | FDR Q-Val | Observed Gene Hits |
| GO Molecular Function    | transcription regulator activity                                                                              | 3.6557e-9              | 8.7007e-6 | 35                 |
|                          | DNA binding                                                                                                   | 3.6993e-9              | 4.4022e-6 | 47                 |
|                          | transcription factor activity                                                                                 | 5.3544e-8              | 4.2478e-5 | 26                 |
|                          | nucleic acid binding                                                                                          | 4.3081e-6              | 0.0026    | 51                 |
|                          | sequence-specific DNA binding                                                                                 | 8.0480e-6              | 0.0038    | 18                 |
|                          | protein binding                                                                                               | 6.0880e-5              | 0.0241    | 84                 |
| GO Biological Process    | skeletal system development                                                                                   | 9.2897e-10             | 4.2075e-6 | 18                 |
|                          | regulation of RNA metabolic process                                                                           | 1.4155e-9              | 3.2125e-6 | 52                 |
|                          | regulation of nucleobase, nucleoside, nucleotide and nucleic acid metabolic process                           | 7.9548e-9              | 1.2036e-5 | 53                 |
|                          | regulation of transcription, DNA-dependent                                                                    | 9.3464e-9              | 1.0606e-5 | 50                 |
|                          | regionalization                                                                                               | 1.4001e-8              | 1.2710e-5 | 15                 |
|                          | anatomical structure development                                                                              | 2.5013e-8              | 1.8923e-5 | 49                 |
|                          | regulation of metabolic process                                                                               | 3.2642e-8              | 2.1166e-5 | 58                 |
|                          | regulation of transcription                                                                                   | 3.3637e-8              | 1.9085e-5 | 50                 |
|                          | regulation of cellular metabolic process                                                                      | 3.5466e-8              | 1.7887e-5 | 56                 |
|                          | regulation of gene expression                                                                                 | 4.2431e-8              | 1.9259e-5 | 52                 |
| GO Cellular Component    | nucleus                                                                                                       | 1.3518e-8              | 9.2736e-6 | 82                 |
|                          | membrane-bounded organelle                                                                                    | 1.9918e-5              | 0.0068    | 103                |
|                          | intracellular membrane-bounded organelle                                                                      | 3.4720e-5              | 0.0079    | 102                |
|                          | organelle                                                                                                     | 3.6713e-5              | 0.0063    | 112                |
|                          | intracellular organelle                                                                                       | 6.3686e-5              | 0.0087    | 111                |
|                          | intracellular                                                                                                 | 6.3946e-5              | 0.0073    | 130                |
|                          | intracellular part                                                                                            | 0.0002                 | 0.0201    | 125                |
| Mouse Phenotype          | abnormal skeleton morphology                                                                                  | 7.4292e-10             | 4.3074e-6 | 34                 |
|                          | abnormal axial skeleton morphology                                                                            | 1.0089e-9              | 2.9249e-6 | 28                 |
|                          | skeleton phenotype                                                                                            | 3.2505e-9              | 6.2821e-6 | 34                 |
|                          | abnormal appendicular skeleton morphology                                                                     | 7.6078e-8              | 0.0001    | 18                 |
|                          | abnormal limbs/digits/tail morphology                                                                         | 1.3570e-7              | 0.0002    | 23                 |
|                          | abnormal skull morphology                                                                                     | 1.8021e-7              | 0.0002    | 18                 |
|                          | abnormal skeleton extremities morphology                                                                      | 2.2887e-7              | 0.0002    | 17                 |
|                          | growth/size phenotype                                                                                         | 3.0783e-7              | 0.0002    | 52                 |
|                          | abnormal craniofacial bone morphology                                                                         | 3.7211e-7              | 0.0002    | 18                 |
|                          | lethality-prenatal/perinatal                                                                                  | 8.7640e-7              | 0.0005    | 47                 |
| MSigDB Pathway           | The attachment of a cell, either to another cell or to the extracellular matrix, via cell adhesion molecules. | 4.0477e-5              | 0.0185    | 10                 |
| MGI Expression: Detected | TS21_metanephros;excretory component;cortex;nephrons                                                          | 6.0936e-9              | 4.0833e-5 | 6                  |
|                          | TS21_metanephros;excretory component;cortex                                                                   | 1.0059e-8              | 3.3701e-5 | 6                  |
|                          | TS28_tooth                                                                                                    | 1.1303e-8              | 2.5248e-5 | 25                 |
|                          | TS17_central nervous system                                                                                   | 1.7965e-8              | 3.0096e-5 | 46                 |
|                          | TS21_organ system                                                                                             | 1.8311e-8              | 2.4540e-5 | 52                 |
|                          | TS20_visceral organ                                                                                           | 2.1460e-8              | 2.3968e-5 | 30                 |
|                          | TS17_nervous system                                                                                           | 2.1561e-8              | 2.0640e-5 | 46                 |
|                          | TS21_metanephros;excretory component                                                                          | 3.6246e-8              | 3.0360e-5 | 6                  |
|                          | TS19_limb                                                                                                     | 4.5927e-8              | 3.4195e-5 | 16                 |
|                          | TS17_organ system                                                                                             | 5.3151e-8              | 3.5616e-5 | 50                 |
| InterPro                 | Sequence-specific single-strand DNA-binding protein                                                           | 1.5139e-6              | 0.0095    | 3                  |
|                          | Single-stranded DNA-binding protein, SSDP                                                                     | 1.5139e-6              | 0.0095    | 3                  |
| TreeFam                  | Homeobox protein                                                                                              | 5.8622e-7              | 0.0047    | 4                  |
|                          | Single-stranded DNA-binding protein                                                                           | 1.5139e-6              | 0.0060    | 3                  |
|                          | DNA-binding protein inhibitor                                                                                 | 6.0039e-6              | 0.0159    | 3                  |

**Supplementary Table 12:** GREAT enrichments of all p300 limb peaks using the *basal plus extension* association rule with a basal regulatory region extending 5 kb upstream and 1 kb downstream of the transcription start site and a maximum extension of 50 kb. Shown are the top ten binomial enriched terms at a false discovery rate of 0.05 with a fold enrichment of at least two that are also significant by the hypergeometric test.

| Ontology                 | Term                                                                 | Binomial Results |            |                 | Hypergeometric Results |                 |                    |
|--------------------------|----------------------------------------------------------------------|------------------|------------|-----------------|------------------------|-----------------|--------------------|
|                          | Name                                                                 | Raw P-Value      | FDR Q-Val  | Fold Enrichment | FDR Q-Val              | Fold Enrichment | Observed Gene Hits |
| GO Molecular Function    | transcription regulator activity                                     | 5.6169e-13       | 1.3368e-9  | 2.0203          | 1.2322e-7              | 1.9388          | 98                 |
|                          | sequence-specific DNA binding                                        | 8.1588e-7        | 0.0003     | 2.0215          | 6.6705e-5              | 2.1673          | 51                 |
|                          | protein tyrosine kinase activity                                     | 0.0004           | 0.0465     | 2.3137          | 0.0489                 | 2.5252          | 19                 |
| GO Biological Process    | embryonic limb morphogenesis                                         | 1.6288e-20       | 7.3931e-17 | 6.4212          | 5.0357e-10             | 5.7567          | 25                 |
|                          | limb morphogenesis                                                   | 1.1569e-19       | 2.6256e-16 | 5.9118          | 1.8612e-9              | 5.2008          | 26                 |
|                          | limb development                                                     | 4.9014e-19       | 7.4159e-16 | 5.6788          | 4.1765e-9              | 4.9989          | 26                 |
|                          | embryonic morphogenesis                                              | 1.7101e-16       | 1.9406e-13 | 3.2874          | 2.8018e-7              | 2.7862          | 44                 |
|                          | skeletal system development                                          | 7.3647e-15       | 4.7755e-12 | 3.4967          | 2.0494e-10             | 3.5084          | 45                 |
|                          | embryonic development                                                | 8.5880e-12       | 4.3312e-9  | 2.2938          | 9.4936e-6              | 2.0685          | 61                 |
|                          | embryonic skeletal system development                                | 4.0128e-11       | 1.3010e-8  | 5.3263          | 0.0004                 | 4.0142          | 15                 |
|                          | organ morphogenesis                                                  | 1.0976e-10       | 3.3213e-8  | 2.1752          | 1.3843e-7              | 2.2527          | 67                 |
|                          | negative regulation of transcription from RNA polymerase II promoter | 1.2511e-10       | 3.5492e-8  | 3.3375          | 5.6948e-5              | 2.8880          | 28                 |
|                          | mammary gland development                                            | 2.7168e-9        | 4.2523e-7  | 7.0476          | 0.0113                 | 4.8008          | 8                  |
| Mouse Phenotype          | abnormal skeleton morphology                                         | 7.5433e-28       | 4.3736e-24 | 2.7202          | 3.5401e-17             | 2.5474          | 115                |
|                          | skeleton phenotype                                                   | 8.6486e-28       | 2.5072e-24 | 2.6645          | 2.3731e-17             | 2.4885          | 119                |
|                          | abnormal appendicular skeleton morphology                            | 9.4039e-26       | 1.8175e-22 | 3.8649          | 1.6816e-13             | 3.4083          | 58                 |
|                          | abnormal limbs/digits/tail morphology                                | 5.9854e-25       | 8.6759e-22 | 3.0870          | 8.0748e-15             | 2.8695          | 81                 |
|                          | abnormal axial skeleton morphology                                   | 3.0148e-24       | 3.4959e-21 | 2.9220          | 1.4403e-15             | 2.7887          | 89                 |
|                          | abnormal long bone morphology                                        | 1.5957e-22       | 1.5420e-19 | 4.0174          | 3.1734e-11             | 3.5172          | 46                 |
|                          | abnormal skull morphology                                            | 3.8286e-22       | 3.1711e-19 | 3.4599          | 3.5024e-13             | 3.2728          | 59                 |
|                          | abnormal craniofacial bone morphology                                | 4.8977e-22       | 3.5496e-19 | 3.3865          | 2.6738e-13             | 3.2213          | 61                 |
|                          | abnormal limb morphology                                             | 4.9646e-22       | 3.1983e-19 | 3.4152          | 2.4143e-13             | 3.2473          | 61                 |
|                          | abnormal skeleton extremities morphology                             | 7.3329e-22       | 4.2516e-19 | 3.6231          | 1.5524e-11             | 3.2394          | 53                 |
| PANTHER Pathway          | Angiogenesis                                                         | 0.0002           | 0.0235     | 2.4564          | 0.0406                 | 2.4573          | 17                 |
|                          | PDGF signaling pathway                                               | 0.0004           | 0.0222     | 2.6000          | 0.0656                 | 2.8004          | 14                 |
| MGI Expression: Detected | TS20_visceral organ                                                  | 1.0389e-19       | 6.9614e-16 | 2.4665          | 3.5592e-12             | 2.3610          | 98                 |
|                          | TS21_visceral organ                                                  | 5.3113e-19       | 1.7796e-15 | 2.4464          | 7.6081e-11             | 2.2542          | 93                 |
|                          | TS19_embryo                                                          | 4.0952e-18       | 9.1473e-15 | 2.0961          | 3.2546e-12             | 2.0625          | 128                |
|                          | TS19_forelimb bud                                                    | 4.7047e-18       | 7.8815e-15 | 4.4011          | 3.0380e-12             | 4.5607          | 38                 |
|                          | TS19_limb                                                            | 3.3198e-17       | 4.4492e-14 | 3.5236          | 2.5667e-12             | 3.8053          | 49                 |
|                          | Theiler_stage_19                                                     | 4.6587e-17       | 4.4597e-14 | 2.0391          | 2.6771e-11             | 1.9881          | 128                |
|                          | TS17_embryo,mesenchyme                                               | 6.8990e-17       | 5.7787e-14 | 3.5109          | 7.8631e-11             | 3.4637          | 46                 |
|                          | TS20_forelimb                                                        | 8.2565e-17       | 6.1474e-14 | 4.0308          | 7.6413e-11             | 4.0677          | 38                 |
|                          | TS20_limb                                                            | 1.4352e-16       | 9.6170e-14 | 3.2641          | 5.8255e-11             | 3.3116          | 50                 |
|                          | TS19_hindlimb bud                                                    | 5.6127e-15       | 2.2124e-12 | 4.5367          | 1.9081e-10             | 4.8300          | 30                 |
| InterPro                 | EGF-like calcium-binding, conserved site                             | 1.2223e-5        | 0.0070     | 3.7003          | 0.1353                 | 3.9006          | 13                 |
|                          | EGF calcium-binding                                                  | 2.4595e-5        | 0.0119     | 3.4893          | 0.0945                 | 3.7859          | 13                 |
|                          | EGF-like calcium-binding                                             | 3.8742e-5        | 0.0135     | 2.9752          | 0.0473                 | 3.2332          | 16                 |
|                          | Calponin-like actin-binding                                          | 7.6706e-5        | 0.0219     | 3.3134          | 0.0945                 | 3.7859          | 13                 |
| TreeFam                  | DNA-binding protein inhibitor                                        | 2.9770e-16       | 2.3676e-12 | 43.5910         | 0.0257                 | 19.8032         | 4                  |
|                          | Homeobox protein                                                     | 1.0887e-12       | 4.3291e-9  | 33.7101         | 0.0498                 | 14.1451         | 5                  |

**Supplementary Table 13:** GREAT enrichments of all p300 limb peaks using the *two nearest genes* association rule with a maximum extension of 1 Mb. Shown are the top ten binomial enriched terms at a false discovery rate of 0.05 with a fold enrichment of at least two that are also significant by the hypergeometric test.

| Ontology                                  | Term                                                                 | Binomial Results                   |            |                 | Hypergeometric Results |                 |                    |     |
|-------------------------------------------|----------------------------------------------------------------------|------------------------------------|------------|-----------------|------------------------|-----------------|--------------------|-----|
|                                           | Name                                                                 | Raw P-Value                        | FDR Q-Val  | Fold Enrichment | FDR Q-Val              | Fold Enrichment | Observed Gene Hits |     |
| GO Molecular Function                     | transcription repressor activity                                     | 2.2361e-14                         | 7.6028e-12 | 2.2121          | 0.0032                 | 1.9555          | 42                 |     |
|                                           | extracellular matrix structural constituent                          | 0.0005                             | 0.0231     | 2.5811          | 0.0161                 | 3.4143          | 11                 |     |
| GO Biological Process                     | regulation of transcription from RNA polymerase II promoter          | 1.5185e-32                         | 4.9231e-30 | 2.0043          | 2.6681e-13             | 1.9634          | 136                |     |
|                                           | embryonic limb morphogenesis                                         | 8.2964e-32                         | 2.2151e-29 | 3.8863          | 1.9695e-15             | 3.8979          | 45                 |     |
|                                           | embryonic morphogenesis                                              | 3.7150e-30                         | 7.3315e-28 | 2.3116          | 5.8877e-17             | 2.4595          | 104                |     |
|                                           | limb morphogenesis                                                   | 4.8919e-30                         | 8.5401e-28 | 3.5904          | 1.5079e-15             | 3.6871          | 49                 |     |
|                                           | limb development                                                     | 1.6779e-29                         | 2.6262e-27 | 3.4425          | 3.2959e-16             | 3.6885          | 51                 |     |
|                                           | skeletal system development                                          | 1.1826e-25                         | 1.4126e-23 | 2.3668          | 2.3362e-19             | 2.7862          | 95                 |     |
|                                           | negative regulation of transcription, DNA-dependent                  | 2.0548e-22                         | 2.0276e-20 | 2.3164          | 1.3373e-7              | 2.0796          | 67                 |     |
|                                           | negative regulation of RNA metabolic process                         | 2.5791e-22                         | 2.3413e-20 | 2.3110          | 1.7852e-7              | 2.0624          | 67                 |     |
|                                           | negative regulation of transcription from RNA polymerase II promoter | 1.0005e-21                         | 8.5681e-20 | 2.4462          | 2.8140e-8              | 2.2891          | 59                 |     |
|                                           | negative regulation of gene expression                               | 1.0549e-19                         | 8.1155e-18 | 2.0856          | 3.5211e-8              | 1.9914          | 81                 |     |
|                                           | Mouse Phenotype                                                      | abnormal craniofacial morphology   | 5.4778e-56 | 1.5880e-52      | 2.1345                 | 6.2099e-34      | 2.3901             | 214 |
|                                           |                                                                      | abnormal axial skeleton morphology | 1.0466e-49 | 1.0114e-46      | 2.1174                 | 8.9529e-33      | 2.4045             | 204 |
| abnormal limbs/digits/tail morphology     |                                                                      | 1.6304e-48                         | 1.3504e-45 | 2.2068          | 3.9785e-30             | 2.4387          | 183                |     |
| abnormal skull morphology                 |                                                                      | 6.4357e-46                         | 4.6643e-43 | 2.3867          | 1.8358e-29             | 2.8379          | 136                |     |
| abnormal craniofacial bone morphology     |                                                                      | 3.2635e-45                         | 1.8922e-42 | 2.3389          | 2.0334e-30             | 2.8208          | 142                |     |
| abnormal limb morphology                  |                                                                      | 2.2391e-42                         | 1.1802e-39 | 2.3581          | 2.9425e-26             | 2.6834          | 134                |     |
| abnormal paw/hand/foot morphology         |                                                                      | 8.2520e-39                         | 3.4175e-36 | 2.8459          | 1.1918e-20             | 3.0442          | 85                 |     |
| abnormal appendicular skeleton morphology |                                                                      | 1.5614e-38                         | 6.0352e-36 | 2.3801          | 3.3973e-25             | 2.7410          | 124                |     |
| abnormal head morphology                  |                                                                      | 3.6176e-37                         | 1.3109e-34 | 2.1157          | 3.6570e-23             | 2.3674          | 150                |     |
| abnormal vertebrae morphology             |                                                                      | 5.3876e-37                         | 1.7354e-34 | 2.7506          | 2.2193e-14             | 2.4930          | 84                 |     |
| PANTHER Pathway                           | TGF-beta signaling pathway                                           | 2.9388e-5                          | 0.0015     | 2.0268          | 0.0298                 | 2.0984          | 20                 |     |
| MGI Expression: Detected                  | TS19_limb                                                            | 2.2356e-53                         | 4.9936e-50 | 2.8063          | 1.5992e-35             | 3.4764          | 119                |     |
|                                           | TS19_forelimb bud                                                    | 7.1220e-42                         | 3.6711e-39 | 2.9852          | 8.3868e-31             | 3.9278          | 87                 |     |
|                                           | TS22_upper jaw                                                       | 1.7967e-40                         | 7.5247e-38 | 2.2157          | 8.9634e-18             | 2.1348          | 143                |     |
|                                           | TS20_limb                                                            | 7.4747e-39                         | 2.2767e-36 | 2.3906          | 7.8311e-28             | 2.9648          | 119                |     |
|                                           | TS19_hindlimb bud                                                    | 1.7814e-36                         | 4.1162e-34 | 3.1471          | 2.8176e-22             | 3.8761          | 64                 |     |
|                                           | TS20_forelimb                                                        | 3.1187e-35                         | 6.3329e-33 | 2.7356          | 5.3056e-22             | 3.2616          | 81                 |     |
|                                           | TS17_limb                                                            | 5.3195e-34                         | 9.9017e-32 | 2.2279          | 1.2394e-24             | 2.5128          | 141                |     |
|                                           | TS22_palatal shelf                                                   | 8.0176e-34                         | 1.4521e-31 | 2.1902          | 1.0523e-12             | 1.9954          | 120                |     |
|                                           | TS22_tooth#                                                          | 3.5421e-33                         | 5.9340e-31 | 2.0962          | 2.7174e-12             | 1.9224          | 128                |     |
|                                           | TS22_jaw#                                                            | 4.0153e-33                         | 6.5626e-31 | 2.0946          | 3.1462e-12             | 1.9185          | 128                |     |
| InterPro                                  | High mobility group, HMG1/HMG2                                       | 8.5018e-11                         | 5.9333e-8  | 2.7325          | 0.0368                 | 2.7365          | 18                 |     |
|                                           | MAD homology 1, Dwarfin-type                                         | 1.9831e-9                          | 1.0752e-6  | 4.5728          | 0.0392                 | 4.9662          | 8                  |     |

**Supplementary Table 14:** GREAT enrichments of all p300 limb peaks using the *single nearest gene* association rule with a maximum extension of 1 Mb. Shown are the top ten binomial enriched terms at a false discovery rate of 0.05 with a fold enrichment of at least two that are also significant by the hypergeometric test.

| Ontology                 | Term                                                                 | Binomial Results |            |                 | Hypergeometric Results |                 |                    |
|--------------------------|----------------------------------------------------------------------|------------------|------------|-----------------|------------------------|-----------------|--------------------|
|                          | Name                                                                 | Raw P-Value      | FDR Q-Val  | Fold Enrichment | FDR Q-Val              | Fold Enrichment | Observed Gene Hits |
| GO Molecular Function    | transcription repressor activity                                     | 2.9908e-12       | 8.1286e-10 | 2.5356          | 0.0016                 | 2.3669          | 31                 |
| GO Biological Process    | embryonic limb morphogenesis                                         | 2.5708e-29       | 1.1669e-25 | 5.0461          | 1.2157e-16             | 5.3979          | 38                 |
|                          | limb morphogenesis                                                   | 4.7533e-26       | 1.0786e-24 | 4.6297          | 5.2672e-16             | 4.9359          | 40                 |
|                          | limb development                                                     | 1.1141e-27       | 1.6856e-24 | 4.3571          | 7.1912e-17             | 4.9814          | 42                 |
|                          | regulation of transcription from RNA polymerase II promoter          | 1.1096e-25       | 5.0364e-23 | 2.2123          | 3.2387e-13             | 2.3202          | 98                 |
|                          | negative regulation of transcription, DNA-dependent                  | 2.5099e-19       | 4.0686e-17 | 2.6709          | 4.4165e-8              | 2.5451          | 50                 |
|                          | negative regulation of RNA metabolic process                         | 2.8937e-19       | 4.5291e-17 | 2.6654          | 5.7807e-8              | 2.5240          | 50                 |
|                          | negative regulation of transcription from RNA polymerase II promoter | 4.7733e-19       | 6.7706e-17 | 2.8608          | 2.1719e-8              | 2.7996          | 44                 |
|                          | embryonic morphogenesis                                              | 3.2235e-17       | 3.1131e-15 | 2.3069          | 3.6864e-13             | 2.7535          | 71                 |
|                          | regulation of cell proliferation                                     | 4.5127e-17       | 4.2673e-15 | 2.1152          | 1.3684e-11             | 2.3644          | 81                 |
|                          | skeletal system development                                          | 7.5513e-17       | 6.7206e-15 | 2.5210          | 1.3323e-12             | 2.9338          | 61                 |
| GO Cellular Component    | transcription factor complex                                         | 4.0469e-8        | 2.1355e-6  | 2.0335          | 0.0031                 | 2.0926          | 37                 |
| Mouse Phenotype          | abnormal limbs/digits/tail morphology                                | 2.3266e-37       | 1.3490e-33 | 2.4595          | 5.6301e-28             | 2.9284          | 134                |
|                          | abnormal limb morphology                                             | 1.3929e-36       | 4.0380e-33 | 2.7658          | 4.0750e-26             | 3.3496          | 102                |
|                          | abnormal appendicular skeleton morphology                            | 4.4198e-35       | 6.4065e-32 | 2.8516          | 2.8255e-25             | 3.4438          | 95                 |
|                          | abnormal skeleton morphology                                         | 5.6527e-35       | 6.5549e-32 | 2.0918          | 2.1384e-28             | 2.4870          | 182                |
|                          | abnormal craniofacial morphology                                     | 2.5246e-34       | 2.4396e-31 | 2.1960          | 4.0889e-28             | 2.7473          | 150                |
|                          | skeleton phenotype                                                   | 3.8589e-34       | 3.1962e-31 | 2.0487          | 4.3114e-28             | 2.4123          | 187                |
|                          | abnormal paw/hand/foot morphology                                    | 1.6653e-32       | 1.2069e-29 | 3.4062          | 8.2344e-22             | 3.9936          | 68                 |
|                          | abnormal skeleton extremities morphology                             | 2.1662e-32       | 1.3955e-29 | 2.7866          | 2.0896e-23             | 3.3934          | 90                 |
|                          | abnormal digit morphology                                            | 9.8712e-32       | 5.7233e-29 | 3.6051          | 6.0654e-21             | 4.2664          | 60                 |
|                          | abnormal axial skeleton morphology                                   | 3.9668e-31       | 2.1014e-28 | 2.1828          | 1.8916e-28             | 2.8221          | 146                |
| MGI Expression: Detected | TS19_limb                                                            | 2.2483e-31       | 1.5066e-27 | 2.8239          | 2.9296e-27             | 4.0242          | 84                 |
|                          | TS22_upper jaw                                                       | 1.2669e-28       | 8.4893e-26 | 2.4002          | 1.7504e-15             | 2.4482          | 100                |
|                          | TS19_hindlimb bud                                                    | 4.3317e-27       | 2.2328e-24 | 3.4949          | 4.4759e-19             | 4.7673          | 48                 |
|                          | TS28_tooth                                                           | 1.2030e-26       | 4.4784e-24 | 2.3475          | 1.0977e-13             | 2.2425          | 105                |
|                          | TS21_embryo;head#                                                    | 3.0887e-26       | 1.0694e-23 | 2.0030          | 1.5722e-17             | 2.1507          | 147                |
|                          | TS20_limb                                                            | 3.2784e-26       | 1.0984e-23 | 2.5442          | 3.5913e-26             | 3.6772          | 90                 |
|                          | TS19_forelimb bud                                                    | 4.1487e-26       | 1.2637e-23 | 3.0787          | 1.9024e-23             | 4.5904          | 62                 |
|                          | TS17_limb                                                            | 1.7165e-25       | 4.6009e-23 | 2.3786          | 2.1016e-20             | 2.8933          | 99                 |
|                          | TS22_lung                                                            | 2.6541e-25       | 6.8405e-23 | 2.0191          | 6.0779e-15             | 2.1175          | 130                |
|                          | TS22_metanephros                                                     | 9.3375e-24       | 2.1576e-21 | 2.0035          | 1.6062e-13             | 2.0754          | 123                |
| InterPro                 | High mobility group, HMG1/HMG2                                       | 1.2523e-8        | 1.5732e-5  | 3.1425          | 0.0158                 | 3.7397          | 15                 |

**Supplementary Table 15:** Enrichments for regions bound by p300 in mouse forebrain. (a) DAVID gene-based enrichments of genes with proximal p300 binding events. (b) GREAT *cis*-regulatory element enrichments for all regions bound by p300.

**a**  
**DAVID Gene-based Enrichments of p300 Binding Peaks in Mouse Forebrain**

| Annotation Cluster 1                     | Enrichment Score: 5.03                     | Count | P Value | Benjamini     |
|------------------------------------------|--------------------------------------------|-------|---------|---------------|
| <input type="checkbox"/> SP_PIR_KEYWORDS | Transcription                              | RT    | 33      | 4.5E-9 3.9E-6 |
| <input type="checkbox"/> SP_PIR_KEYWORDS | Transcription regulation                   | RT    | 31      | 4.4E-8 1.9E-5 |
| <input type="checkbox"/> GOTERM_CC_ALL   | nucleus                                    | RT    | 61      | 1.0E-7 8.1E-5 |
| <input type="checkbox"/> GOTERM_BP_ALL   | transcription                              | RT    | 42      | 3.5E-7 1.6E-3 |
| <input type="checkbox"/> SP_PIR_KEYWORDS | nucleus                                    | RT    | 51      | 4.4E-7 1.3E-4 |
| <input type="checkbox"/> GOTERM_BP_ALL   | regulation of gene expression              | RT    | 42      | 8.4E-7 2.2E-3 |
| <input type="checkbox"/> GOTERM_BP_ALL   | RNA metabolic process                      | RT    | 44      | 9.4E-7 1.6E-3 |
| <input type="checkbox"/> GOTERM_BP_ALL   | regulation of transcription, DNA-dependent | RT    | 39      | 9.8E-7 1.3E-3 |
| <input type="checkbox"/> GOTERM_BP_ALL   | regulation of cellular process             | RT    | 55      | 9.8E-7 1.0E-3 |
| <input type="checkbox"/> GOTERM_BP_ALL   | transcription, DNA-dependent               | RT    | 39      | 1.3E-6 9.6E-4 |
| Annotation Cluster 2                     | Enrichment Score: 4.29                     | Count | P Value | Benjamini     |
| <input type="checkbox"/> GOTERM_CC_ALL   | nucleus                                    | RT    | 61      | 1.0E-7 8.1E-5 |
| <input type="checkbox"/> SP_PIR_KEYWORDS | nucleus                                    | RT    | 51      | 4.4E-7 1.3E-4 |
| <input type="checkbox"/> GOTERM_CC_ALL   | intracellular organelle                    | RT    | 86      | 9.6E-7 3.8E-4 |
| <input type="checkbox"/> GOTERM_CC_ALL   | organelle                                  | RT    | 86      | 1.0E-6 2.6E-4 |
| <input type="checkbox"/> GOTERM_CC_ALL   | intracellular membrane-bound organelle     | RT    | 74      | 7.1E-5 1.4E-2 |
| <input type="checkbox"/> GOTERM_CC_ALL   | membrane-bound organelle                   | RT    | 74      | 7.4E-5 1.2E-2 |
| <input type="checkbox"/> GOTERM_CC_ALL   | intracellular                              | RT    | 95      | 8.1E-5 1.0E-2 |
| <input type="checkbox"/> GOTERM_CC_ALL   | intracellular part                         | RT    | 91      | 8.8E-5 9.8E-3 |
| Annotation Cluster 3                     | Enrichment Score: 3.72                     | Count | P Value | Benjamini     |
| <input type="checkbox"/> GOTERM_BP_ALL   | nervous system development                 | RT    | 20      | 1.1E-6 9.5E-4 |
| <input type="checkbox"/> GOTERM_BP_ALL   | developmental process                      | RT    | 47      | 1.5E-6 8.9E-4 |
| <input type="checkbox"/> GOTERM_BP_ALL   | multicellular organismal development       | RT    | 38      | 5.4E-6 1.8E-3 |
| <input type="checkbox"/> GOTERM_BP_ALL   | central nervous system development         | RT    | 11      | 3.3E-5 8.6E-3 |
| Annotation Cluster 4                     | Enrichment Score: 2.51                     | Count | P Value | Benjamini     |
| <input type="checkbox"/> GOTERM_BP_ALL   | nervous system development                 | RT    | 20      | 1.1E-6 9.5E-4 |
| <input type="checkbox"/> GOTERM_BP_ALL   | forebrain development                      | RT    | 8       | 1.6E-5 4.3E-3 |
| <input type="checkbox"/> GOTERM_BP_ALL   | central nervous system development         | RT    | 11      | 3.3E-5 8.6E-3 |
| <input type="checkbox"/> GOTERM_BP_ALL   | brain development                          | RT    | 9       | 1.7E-4 4.0E-2 |

**b**  
**GREAT Enrichments of p300 Binding Peaks in Mouse Forebrain**

| Ontology                     | Term                                                                 | Binomial Results                                |            |                 | Hypergeometric Results |                 |                    |
|------------------------------|----------------------------------------------------------------------|-------------------------------------------------|------------|-----------------|------------------------|-----------------|--------------------|
|                              |                                                                      | Raw P-Value                                     | FDR Q-Val  | Fold Enrichment | FDR Q-Val              | Fold Enrichment | Observed Gene Hits |
| GO Molecular Function        | transcription activator activity                                     | 9.8138e-17                                      | 3.3367e-14 | 2.1671          | 0.0054                 | 1.7854          | 50                 |
|                              | RNA polymerase II transcription factor activity, enhancer binding    | 2.3195e-10                                      | 5.5180e-8  | 2.8890          | 0.0009                 | 3.5351          | 15                 |
|                              | chromatin binding                                                    | 6.3626e-9                                       | 1.3610e-6  | 2.0209          | 0.0006                 | 2.2133          | 36                 |
|                              | RNA polymerase II transcription factor activity                      | 1.5151e-8                                       | 3.0049e-6  | 2.2535          | 0.0053                 | 2.3257          | 25                 |
|                              | non-G-protein coupled 7TM receptor activity                          | 2.3684e-6                                       | 0.0004     | 4.2265          | 0.0144                 | 4.9492          | 7                  |
| GO Biological Process        | central nervous system development                                   | 2.9203e-38                                      | 8.2945e-36 | 2.3002          | 3.1913e-25             | 2.8137          | 117                |
|                              | brain development                                                    | 5.2647e-31                                      | 7.7085e-29 | 2.3400          | 8.9757e-19             | 2.7814          | 91                 |
|                              | forebrain development                                                | 2.4494e-27                                      | 2.4169e-25 | 2.6771          | 1.7858e-12             | 2.9037          | 58                 |
|                              | positive regulation of transcription, DNA-dependent                  | 1.1227e-26                                      | 9.9921e-25 | 2.0015          | 6.5891e-13             | 2.1333          | 105                |
|                              | positive regulation of RNA metabolic process                         | 1.1562e-26                                      | 1.0092e-24 | 2.0011          | 7.9806e-13             | 2.1272          | 105                |
|                              | positive regulation of transcription from RNA polymerase II promoter | 1.7927e-26                                      | 1.4530e-24 | 2.0408          | 2.0528e-13             | 2.2292          | 99                 |
|                              | cell fate commitment                                                 | 2.3145e-24                                      | 1.6675e-22 | 2.4560          | 8.3241e-18             | 3.2826          | 65                 |
|                              | Wnt receptor signaling pathway                                       | 6.1087e-21                                      | 4.2688e-19 | 2.8889          | 0.0013                 | 1.9942          | 33                 |
|                              | pallium development                                                  | 3.0346e-19                                      | 2.0588e-17 | 3.6197          | 0.0002                 | 2.9203          | 19                 |
|                              | telencephalon development                                            | 2.4607e-18                                      | 1.6187e-16 | 3.2370          | 1.0366e-5              | 2.8977          | 25                 |
| Mouse Phenotype              | abnormal neurogenesis                                                | 2.3609e-38                                      | 2.7377e-35 | 2.4125          | 1.2103e-29             | 3.2517          | 109                |
|                              | abnormal brain white matter morphology                               | 4.0745e-36                                      | 3.3748e-33 | 2.8781          | 2.0405e-20             | 3.7503          | 61                 |
|                              | abnormal tract                                                       | 1.3636e-34                                      | 6.9150e-32 | 2.8782          | 3.8695e-21             | 3.6919          | 60                 |
|                              | abnormal brain commissure morphology                                 | 7.3496e-33                                      | 3.5512e-30 | 2.9718          | 3.5667e-18             | 3.8700          | 52                 |
|                              | abnormal corpus callosum morphology                                  | 5.2543e-30                                      | 2.1760e-27 | 3.2697          | 9.2958e-14             | 3.8837          | 39                 |
|                              | abnormal dorsal telencephalic commissure morphology                  | 5.7327e-30                                      | 2.2159e-27 | 3.2480          | 8.7070e-14             | 3.8218          | 40                 |
|                              | abnormal cerebrum morphology                                         | 1.5317e-29                                      | 5.5506e-27 | 2.0824          | 4.1948e-21             | 2.5342          | 119                |
|                              | abnormal diencephalon morphology                                     | 3.1726e-29                                      | 1.0820e-26 | 2.4724          | 7.6801e-17             | 2.7666          | 81                 |
|                              | abnormal cerebral cortex morphology                                  | 1.3363e-26                                      | 3.8740e-24 | 2.2773          | 2.4136e-16             | 2.6632          | 84                 |
|                              | abnormal brain ventricle/choroid plexus morphology                   | 1.2743e-24                                      | 3.3585e-22 | 2.4304          | 1.5390e-12             | 2.6028          | 67                 |
| PANTHER pathway              | Notch signaling pathway                                              | 8.0267e-6                                       | 0.0012     | 2.8532          | 0.0084                 | 2.7853          | 13                 |
| MSigDB pathway               | Wnt signaling genes                                                  | 6.7099e-6                                       | 0.0010     | 2.1432          | 0.0180                 | 2.4380          | 20                 |
| MGI Expression: Detected     | TS21_thalamus                                                        | 6.8849e-52                                      | 5.7670e-49 | 2.4054          | 1.8271e-32             | 2.8281          | 146                |
|                              | TS17_brain                                                           | 2.6467e-49                                      | 1.2688e-46 | 2.0581          | 6.1376e-38             | 2.5055          | 212                |
|                              | TS21_midbrain                                                        | 4.5075e-48                                      | 1.7767e-45 | 2.3506          | 3.8552e-28             | 2.6490          | 142                |
|                              | TS21_hypothalamus                                                    | 1.8693e-47                                      | 6.0267e-45 | 2.4920          | 9.0526e-28             | 2.8613          | 123                |
|                              | TS21_cerebral cortex                                                 | 4.8221e-46                                      | 1.3464e-43 | 2.0738          | 3.9298e-19             | 1.9652          | 184                |
|                              | TS21_diencephalon                                                    | 2.6050e-44                                      | 6.7140e-42 | 2.1540          | 7.0221e-32             | 2.6639          | 159                |
|                              | TS17_forebrain                                                       | 2.7451e-43                                      | 6.3431e-41 | 2.2704          | 2.1866e-39             | 3.2979          | 138                |
|                              | TS15_central nervous system                                          | 7.2934e-40                                      | 1.3576e-37 | 2.1206          | 6.6358e-32             | 2.7547          | 150                |
|                              | TS15_nervous system                                                  | 2.5730e-39                                      | 4.6900e-37 | 2.1073          | 6.2093e-31             | 2.7055          | 150                |
|                              | TS22_nasal cavity                                                    | 1.3011e-38                                      | 2.2356e-36 | 2.0188          | 7.0372e-17             | 1.9377          | 168                |
|                              | InterPro                                                             | Basic helix-loop-helix dimerisation region bHLH | 2.1967e-12 | 2.7582e-9       | 2.3208                 | 0.0011          | 2.2525             |
| Helix-loop-helix DNA-binding |                                                                      | 1.0584e-7                                       | 3.6934e-5  | 2.1762          | 0.0197                 | 2.1627          | 26                 |
| Frizzled related             |                                                                      | 8.6113e-7                                       | 0.0003     | 3.7554          | 0.0027                 | 4.7135          | 10                 |
| Frizzled protein             |                                                                      | 2.3884e-6                                       | 0.0007     | 4.2285          | 0.0228                 | 4.9492          | 7                  |

**Supplementary Table 16:** “Gene-based GREAT” enrichments of all genes that possess a p300 forebrain binding peak within 2 kb of its transcription start site. Shown are the top ten hypergeometric enriched terms at a false discovery rate of 0.05.

| Ontology                 | Term                                                                                | Hypergeometric Results |           |                    |
|--------------------------|-------------------------------------------------------------------------------------|------------------------|-----------|--------------------|
|                          | Name                                                                                | Raw P-Value            | FDR Q-Val | Observed Gene Hits |
| GO Biological Process    | forebrain development                                                               | 5.3984e-8              | 0.0002    | 10                 |
|                          | brain development                                                                   | 5.7312e-8              | 0.0001    | 12                 |
|                          | regulation of RNA metabolic process                                                 | 5.6528e-7              | 0.0009    | 32                 |
|                          | developmental process                                                               | 5.6682e-7              | 0.0006    | 40                 |
|                          | multicellular organismal development                                                | 5.9016e-7              | 0.0005    | 35                 |
|                          | central nervous system development                                                  | 7.0350e-7              | 0.0005    | 12                 |
|                          | regulation of nucleobase, nucleoside, nucleotide and nucleic acid metabolic process | 1.0877e-6              | 0.0007    | 33                 |
|                          | transcription                                                                       | 1.3867e-6              | 0.0008    | 29                 |
|                          | nervous system development                                                          | 1.4906e-6              | 0.0008    | 18                 |
|                          | regulation of transcription, DNA-dependent                                          | 1.5149e-6              | 0.0007    | 31                 |
| GO Cellular Component    | nucleus                                                                             | 1.2067e-5              | 0.0083    | 48                 |
| Mouse Phenotype          | abnormal neurogenesis                                                               | 6.9075e-8              | 0.0004    | 12                 |
|                          | abnormal nervous system development                                                 | 1.4332e-7              | 0.0004    | 20                 |
|                          | abnormal nervous system morphology                                                  | 1.7663e-6              | 0.0034    | 28                 |
|                          | abnormal neuron number                                                              | 2.0286e-6              | 0.0029    | 10                 |
|                          | abnormal telencephalon morphology                                                   | 2.3922e-6              | 0.0028    | 14                 |
|                          | abnormal telencephalon development                                                  | 2.4874e-6              | 0.0024    | 7                  |
|                          | increased cochlear inner hair cell number                                           | 2.5283e-6              | 0.0021    | 4                  |
|                          | abnormal forebrain morphology                                                       | 2.8269e-6              | 0.0020    | 16                 |
|                          | increased cochlear outer hair cell number                                           | 4.3625e-6              | 0.0028    | 4                  |
|                          | nervous system phenotype                                                            | 5.1339e-6              | 0.0030    | 31                 |
| PANTHER Pathway          | Notch signaling pathway                                                             | 6.9011e-5              | 0.0103    | 4                  |
| MGI Expression: Detected | TS22_telencephalon                                                                  | 2.3933e-11             | 1.6038e-7 | 27                 |
|                          | TS22_eye                                                                            | 5.1719e-11             | 1.7328e-7 | 29                 |
|                          | TS22_sensory organ                                                                  | 9.8128e-11             | 2.1918e-7 | 31                 |
|                          | TS22_forebrain                                                                      | 1.6560e-10             | 2.7742e-7 | 28                 |
|                          | TS22_retina                                                                         | 8.6109e-10             | 1.1540e-6 | 25                 |
|                          | TS17_telencephalon                                                                  | 1.2685e-9              | 1.4167e-6 | 12                 |
|                          | TS17_forebrain                                                                      | 1.5400e-9              | 1.4743e-6 | 15                 |
|                          | TS17_brain                                                                          | 3.0625e-9              | 2.5652e-6 | 20                 |
|                          | TS22_organ system                                                                   | 3.1382e-9              | 2.3365e-6 | 45                 |
|                          | TS22_embryo                                                                         | 4.8295e-9              | 3.2363e-6 | 48                 |

**Supplementary Table 17:** GREAT enrichments of all p300 forebrain peaks using the *basal plus extension* association rule with a basal regulatory region extending 5 kb upstream and 1 kb downstream of the transcription start site and a maximum extension of 50 kb. Shown are the top ten binomial enriched terms at a false discovery rate of 0.05 with a fold enrichment of at least two that are also significant by the hypergeometric test.

| Ontology                | Term                                            | Binomial Results |            |                 | Hypergeometric Results |                 |                    |
|-------------------------|-------------------------------------------------|------------------|------------|-----------------|------------------------|-----------------|--------------------|
|                         | Name                                            | Raw P.Value      | FDR Q.Val  | Fold Enrichment | FDR Q.Val              | Fold Enrichment | Observed Gene Hits |
| GO Molecular Function   | sequence-specific DNA binding                   | 5.6365e-11       | 6.7074e-8  | 2.3030          | 3.6427e-11             | 2.7938          | 65                 |
|                         | transcription factor activity                   | 7.0053e-11       | 5.5575e-8  | 2.0469          | 2.7930e-11             | 2.4698          | 82                 |
| GO Biological Process   | nervous system development                      | 9.3953e-26       | 4.2645e-22 | 2.6618          | 3.8931e-24             | 3.1201          | 112                |
|                         | generation of neurons                           | 6.5209e-20       | 1.4799e-16 | 2.8982          | 1.2514e-18             | 3.3149          | 71                 |
|                         | neurogenesis                                    | 1.1914e-19       | 1.8026e-16 | 2.8182          | 7.5612e-17             | 3.2504          | 74                 |
|                         | brain development                               | 2.6667e-18       | 3.0260e-15 | 3.5475          | 2.4341e-13             | 3.9544          | 46                 |
|                         | neuron differentiation                          | 2.9767e-18       | 2.7022e-15 | 3.0122          | 3.9547e-14             | 3.3958          | 59                 |
|                         | forebrain development                           | 6.2971e-17       | 4.0832e-14 | 4.1323          | 1.2946e-12             | 4.8017          | 35                 |
|                         | cell development                                | 1.8253e-16       | 9.2055e-14 | 2.2851          | 3.5652e-16             | 2.6936          | 94                 |
|                         | central nervous system development              | 2.6074e-16       | 1.1835e-13 | 3.0445          | 3.3369e-13             | 3.5427          | 52                 |
|                         | positive regulation of Notch signaling pathway  | 1.2509e-11       | 3.5488e-9  | 34.3459         | 0.0049                 | 20.0298         | 3                  |
|                         | neuron migration                                | 5.8788e-11       | 1.4824e-8  | 5.0207          | 1.8633e-6              | 5.4318          | 16                 |
| Mouse Phenotype         | abnormal neurogenesis                           | 9.2653e-27       | 5.3720e-23 | 4.1798          | 1.3047e-17             | 4.4792          | 53                 |
|                         | abnormal brain commissure morphology            | 5.2512e-21       | 1.5223e-17 | 5.5363          | 7.9443e-15             | 6.5360          | 31                 |
|                         | abnormal nervous system development             | 1.6112e-20       | 3.1140e-17 | 2.4118          | 1.7936e-20             | 2.8690          | 108                |
|                         | abnormal tract                                  | 8.1442e-19       | 1.1805e-15 | 4.8786          | 3.8195e-13             | 5.6965          | 31                 |
|                         | abnormal brain white matter morphology          | 1.0514e-18       | 1.0160e-15 | 4.7502          | 2.8238e-13             | 5.5735          | 32                 |
|                         | abnormal telencephalon morphology               | 2.6908e-18       | 2.2287e-15 | 2.7547          | 1.6810e-14             | 3.0747          | 70                 |
|                         | abnormal forebrain morphology                   | 5.5993e-18       | 4.0581e-15 | 2.4731          | 1.6478e-16             | 2.8947          | 87                 |
|                         | abnormal corpus callosum morphology             | 1.1435e-17       | 7.3665e-15 | 5.7913          | 8.2744e-13             | 7.0527          | 25                 |
|                         | abnormal thalamus morphology                    | 1.8060e-17       | 1.0471e-14 | 7.9364          | 5.3193e-9              | 7.4023          | 17                 |
|                         | abnormal neuron morphology                      | 1.8713e-17       | 9.8636e-15 | 2.2283          | 2.0600e-15             | 2.5098          | 103                |
| PANTHER Pathway         | Angiogenesis                                    | 0.0002           | 0.0320     | 2.2995          | 0.0023                 | 2.9241          | 20                 |
| MGI Expression Detected | TS17_brain                                      | 3.9148e-27       | 2.6233e-23 | 2.9737          | 4.9790e-26             | 3.4834          | 104                |
|                         | TS17_forebrain                                  | 3.0409e-26       | 1.0188e-22 | 3.7605          | 1.2149e-25             | 4.7722          | 71                 |
|                         | TS12_embryo,ectoderm;neural ectoderm            | 3.7467e-25       | 8.3689e-22 | 5.1954          | 2.6554e-16             | 5.3504          | 39                 |
|                         | TS12_embryo,ectoderm                            | 5.2856e-25       | 8.8546e-22 | 5.0760          | 3.5752e-16             | 5.1690          | 40                 |
|                         | TS17_hindbrain                                  | 9.1765e-25       | 1.2298e-21 | 3.8903          | 1.4691e-22             | 4.7763          | 62                 |
|                         | TS17_telencephalon                              | 1.2028e-24       | 1.3434e-21 | 4.6996          | 4.7914e-22             | 5.9124          | 49                 |
|                         | TS20_central nervous system                     | 2.8007e-24       | 2.6811e-21 | 2.6746          | 8.9760e-23             | 3.1040          | 106                |
|                         | TS20_brain                                      | 5.1619e-24       | 4.3237e-21 | 2.8496          | 4.4517e-22             | 3.2801          | 94                 |
|                         | TS20_nervous system                             | 8.3027e-24       | 6.1818e-21 | 2.6202          | 7.5020e-23             | 3.0511          | 108                |
|                         | TS22_telencephalon                              | 8.3940e-23       | 5.6248e-20 | 2.3754          | 8.4823e-23             | 2.7964          | 123                |
| InterPro                | Basic helix-loop-helix dimerisation region bHLH | 1.4452e-6        | 0.0030     | 2.9976          | 0.0011                 | 3.5451          | 20                 |
|                         | Homeobox                                        | 5.7503e-6        | 0.0072     | 2.2878          | 6.4240e-6              | 3.0751          | 37                 |
|                         | Homeodomain-related                             | 2.6498e-5        | 0.0166     | 2.0160          | 3.0618e-5              | 2.8663          | 41                 |
|                         | Helix-turn-helix motif, lambda-like repressor   | 5.3266e-5        | 0.0279     | 3.2664          | 0.0008                 | 4.4511          | 16                 |

**Supplementary Table 18:** GREAT enrichments of all p300 forebrain peaks using the *two nearest genes* association rule with a maximum extension of 1 Mb. Shown are the top ten binomial enriched terms at a false discovery rate of 0.05 with a fold enrichment of at least two that are also significant by the hypergeometric test.

| Ontology                 | Term                                                                 | Binomial Results |            |                 | Hypergeometric Results |                 |                    |
|--------------------------|----------------------------------------------------------------------|------------------|------------|-----------------|------------------------|-----------------|--------------------|
|                          | Name                                                                 | Raw P-Value      | FDR Q-Val  | Fold Enrichment | FDR Q-Val              | Fold Enrichment | Observed Gene Hits |
| GO Molecular Function    | transcription activator activity                                     | 1.3202e-16       | 4.4886e-14 | 2.1520          | 0.0110                 | 1.7262          | 50                 |
|                          | RNA polymerase II transcription factor activity, enhancer binding    | 3.0994e-10       | 7.3766e-8  | 2.8629          | 0.0013                 | 3.4178          | 15                 |
|                          | chromatin binding                                                    | 2.6117e-9        | 5.6508e-7  | 2.0425          | 0.0012                 | 2.1398          | 36                 |
|                          | RNA polymerase II transcription factor activity                      | 9.8882e-9        | 1.9612e-6  | 2.2634          | 0.0037                 | 2.3385          | 26                 |
|                          | non-G-protein coupled 7TM receptor activity                          | 2.8037e-6        | 0.0004     | 4.1745          | 0.0180                 | 4.7849          | 7                  |
| GO Biological Process    | central nervous system development                                   | 7.4503e-38       | 1.9892e-35 | 2.2837          | 6.1973e-24             | 2.7203          | 117                |
|                          | brain development                                                    | 9.4746e-31       | 1.2287e-28 | 2.3246          | 8.7016e-18             | 2.6697          | 91                 |
|                          | forebrain development                                                | 2.7816e-27       | 2.5252e-25 | 2.6636          | 7.1774e-12             | 2.7155          | 58                 |
|                          | positive regulation of transcription, DNA-dependent                  | 6.0624e-27       | 5.1919e-25 | 2.0006          | 2.1403e-12             | 2.0821          | 106                |
|                          | positive regulation of RNA metabolic process                         | 6.3071e-27       | 5.3015e-25 | 2.0001          | 2.5879e-12             | 2.0761          | 106                |
|                          | positive regulation of transcription from RNA polymerase II promoter | 8.2969e-27       | 6.4930e-25 | 2.0417          | 5.8283e-13             | 2.1769          | 100                |
|                          | cell fate commitment                                                 | 9.5530e-25       | 6.8827e-23 | 2.4613          | 5.0614e-17             | 3.1737          | 65                 |
|                          | Wnt receptor signaling pathway                                       | 1.6230e-20       | 1.1334e-18 | 2.8488          | 0.0023                 | 1.9280          | 33                 |
|                          | pallium development                                                  | 5.2235e-19       | 3.4867e-17 | 3.5816          | 0.0003                 | 2.8234          | 19                 |
|                          | telencephalon development                                            | 4.6088e-18       | 2.9885e-16 | 3.1996          | 1.8938e-5              | 2.8015          | 25                 |
| Mouse Phenotype          | abnormal neurogenesis                                                | 1.8436e-38       | 2.1378e-35 | 2.4062          | 2.5321e-28             | 3.1438          | 109                |
|                          | abnormal brain white matter morphology                               | 3.6476e-36       | 2.6437e-33 | 2.8706          | 1.2752e-19             | 3.6258          | 61                 |
|                          | abnormal tract                                                       | 1.1887e-34       | 6.8920e-32 | 2.8713          | 2.5569e-20             | 3.7627          | 60                 |
|                          | abnormal brain commissure morphology                                 | 5.4024e-33       | 2.8476e-30 | 2.9678          | 1.6510e-17             | 3.7416          | 52                 |
|                          | abnormal corpus callosum morphology                                  | 3.1362e-30       | 1.2988e-27 | 3.2695          | 2.9945e-13             | 3.7548          | 39                 |
|                          | abnormal dorsal telencephalic commissure morphology                  | 3.5282e-30       | 1.3638e-27 | 3.2469          | 2.8164e-13             | 3.6949          | 40                 |
|                          | abnormal cerebrum morphology                                         | 1.6071e-29       | 5.8237e-27 | 2.0750          | 2.5126e-20             | 2.4707          | 120                |
|                          | abnormal diencephalon morphology                                     | 1.2133e-28       | 4.1382e-26 | 2.4447          | 1.4691e-16             | 2.7078          | 82                 |
|                          | abnormal cerebral cortex morphology                                  | 2.0049e-26       | 5.8122e-24 | 2.2641          | 1.9301e-15             | 2.5748          | 84                 |
|                          | abnormal brain ventricle/choroid plexus morphology                   | 2.2779e-25       | 6.0033e-23 | 2.4477          | 2.4143e-12             | 2.5540          | 68                 |
| PANTHER Pathway          | Notch signaling pathway                                              | 1.1541e-6        | 0.0002     | 3.0365          | 0.0131                 | 2.6928          | 13                 |
|                          | Wnt signaling genes                                                  | 4.2290e-6        | 0.0010     | 2.1627          | 0.0290                 | 2.3671          | 20                 |
| MGI Expression: Detected | TS21_thalamus                                                        | 1.2947e-61       | 9.6398e-49 | 2.3911          | 5.1098e-32             | 2.7717          | 148                |
|                          | TS17_brain                                                           | 9.9512e-60       | 4.7631e-47 | 2.0573          | 2.8939e-37             | 2.4576          | 215                |
|                          | TS21_midbrain                                                        | 8.6056e-48       | 3.2037e-45 | 2.3361          | 9.6675e-28             | 2.5972          | 144                |
|                          | TS21_hypothalamus                                                    | 2.3402e-47       | 7.8408e-45 | 2.4900          | 1.3592e-27             | 2.8015          | 125                |
|                          | TS21_cerebral cortex                                                 | 3.5600e-47       | 1.0843e-44 | 2.0799          | 1.1938e-18             | 1.9309          | 187                |
|                          | TS21_diencephalon                                                    | 5.5268e-44       | 1.3717e-41 | 2.1411          | 2.8697e-31             | 2.6079          | 161                |
|                          | TS17_forebrain                                                       | 1.0799e-43       | 2.4954e-41 | 2.2704          | 4.0758e-39             | 3.2343          | 141                |
|                          | TS15_central nervous system                                          | 1.9176e-40       | 3.6714e-38 | 2.1232          | 2.0708e-31             | 2.6987          | 152                |
|                          | TS15_nervous system                                                  | 7.1368e-40       | 1.2585e-37 | 2.1095          | 1.9353e-30             | 2.6505          | 152                |
|                          | TS22_pallidum                                                        | 2.4780e-38       | 3.3887e-36 | 2.2584          | 3.8420e-18             | 2.2160          | 130                |
| InterPro                 | Basic helix-loop-helix dimerisation region bHLH                      | 8.3285e-13       | 1.0462e-9  | 2.3381          | 0.0008                 | 2.2382          | 37                 |
|                          | Helix-loop-helix DNA-binding                                         | 3.4567e-8        | 1.2772e-5  | 2.2168          | 0.0137                 | 2.1713          | 27                 |
|                          | Frizzled related                                                     | 1.0401e-6        | 0.0003     | 3.7084          | 0.0034                 | 4.5571          | 10                 |
|                          | Frizzled protein                                                     | 2.8037e-6        | 0.0008     | 4.1745          | 0.0274                 | 4.7849          | 7                  |



**Supplementary Table 19:** GREAT enrichments of all p300 forebrain peaks using the *single nearest gene* association rule with a maximum extension of 1 Mb. Shown are the top ten binomial enriched terms at a false discovery rate of 0.05 with a fold enrichment of at least two that are also significant by the hypergeometric test.

| Ontology                 | Term                                                              | Binomial Results |            |                 | Hypergeometric Results |                 |                    |
|--------------------------|-------------------------------------------------------------------|------------------|------------|-----------------|------------------------|-----------------|--------------------|
|                          | Name                                                              | Raw P-Value      | FDR Q-Val  | Fold Enrichment | FDR Q-Val              | Fold Enrichment | Observed Gene Hits |
| GO Molecular Function    | transcription regulator activity                                  | 8.6250e-42       | 2.0528e-38 | 2.0767          | 5.4690e-26             | 2.2401          | 202                |
|                          | transcription factor activity                                     | 1.0425e-29       | 6.2030e-27 | 2.0642          | 1.8859e-22             | 2.4539          | 147                |
|                          | sequence-specific DNA binding                                     | 2.6933e-25       | 1.2820e-22 | 2.1680          | 2.4230e-18             | 2.5965          | 109                |
|                          | RNA polymerase II transcription factor activity, enhancer binding | 2.2185e-10       | 7.5429e-8  | 3.6222          | 0.0066                 | 4.0703          | 11                 |
|                          | RNA polymerase II transcription factor activity                   | 1.0935e-8        | 2.8916e-6  | 2.7570          | 0.0460                 | 2.4831          | 17                 |
|                          | transcription activator activity                                  | 2.3165e-8        | 5.5132e-6  | 2.0201          | 0.0274                 | 1.9062          | 34                 |
|                          | transcription corepressor activity                                | 7.8935e-8        | 1.7079e-5  | 2.7571          | 0.0062                 | 3.1160          | 16                 |
|                          | transcription repressor activity                                  | 9.1033e-8        | 1.8055e-5  | 2.0289          | 0.0013                 | 2.2895          | 33                 |
|                          | chromatin binding                                                 | 2.1428e-7        | 3.6427e-5  | 2.2380          | 0.0063                 | 2.4132          | 25                 |
|                          | transcription cofactor activity                                   | 4.2886e-6        | 0.0006     | 2.0110          | 0.0162                 | 2.2032          | 26                 |
| GO Biological Process    | nervous system development                                        | 6.6255e-37       | 6.0122e-34 | 2.0018          | 3.9404e-42             | 2.9643          | 192                |
|                          | central nervous system development                                | 2.2803e-32       | 7.3930e-30 | 2.6161          | 1.7035e-22             | 3.3227          | 88                 |
|                          | forebrain development                                             | 1.3275e-30       | 3.1714e-28 | 3.4644          | 1.3022e-14             | 3.7256          | 49                 |
|                          | regulation of transcription from RNA polymerase II promoter       | 1.7584e-29       | 3.6278e-27 | 2.2088          | 5.1864e-19             | 2.5170          | 117                |
|                          | brain development                                                 | 5.9863e-29       | 1.1814e-26 | 2.7760          | 1.5386e-18             | 3.3827          | 71                 |
|                          | neurogenesis                                                      | 6.3038e-27       | 1.1445e-24 | 2.0614          | 8.7502e-28             | 3.0186          | 124                |
|                          | generation of neurons                                             | 4.4489e-26       | 6.7311e-24 | 2.0654          | 1.7130e-27             | 3.0792          | 119                |
|                          | neuron differentiation                                            | 7.5793e-24       | 9.8292e-22 | 2.1530          | 8.1487e-25             | 3.2218          | 101                |
|                          | negative regulation of transcription                              | 4.6702e-20       | 5.1702e-18 | 2.4274          | 3.0146e-8              | 2.3127          | 60                 |
|                          | negative regulation of gene expression                            | 1.5699e-19       | 1.6572e-17 | 2.3645          | 1.2799e-8              | 2.3081          | 63                 |
| GO Cellular Component    | transcription factor complex                                      | 2.7781e-10       | 1.9058e-8  | 2.1137          | 1.0270e-5              | 2.3127          | 45                 |
| Mouse Phenotype          | abnormal nervous system development                               | 8.3961e-44       | 4.8681e-40 | 2.1738          | 1.2352e-38             | 2.8120          | 191                |
|                          | abnormal neurogenesis                                             | 7.4807e-37       | 2.1686e-33 | 2.8765          | 2.0472e-28             | 4.0281          | 86                 |
|                          | abnormal forebrain morphology                                     | 9.5574e-32       | 9.2356e-29 | 2.1376          | 1.3564e-28             | 2.7475          | 149                |
|                          | abnormal telencephalon morphology                                 | 3.7471e-30       | 2.7157e-27 | 2.2711          | 1.0295e-24             | 2.8969          | 119                |
|                          | abnormal brain white matter morphology                            | 1.3452e-29       | 8.8660e-27 | 3.2734          | 4.2628e-21             | 4.9230          | 51                 |
|                          | abnormal tract                                                    | 8.6801e-29       | 5.0327e-26 | 3.3016          | 1.3477e-20             | 4.9903          | 49                 |
|                          | abnormal brain commissure morphology                              | 1.0931e-28       | 5.7619e-26 | 3.4674          | 3.4747e-19             | 5.1414          | 44                 |
|                          | abnormal brain development                                        | 1.3153e-28       | 6.3552e-26 | 2.2505          | 5.6928e-26             | 2.9377          | 122                |
|                          | abnormal cerebrum morphology                                      | 5.0801e-27       | 2.1039e-24 | 2.3944          | 2.2651e-20             | 3.0427          | 91                 |
|                          | abnormal dorsal telencephalic commissure morphology               | 6.6515e-26       | 2.5710e-23 | 3.8206          | 1.3998e-15             | 5.2504          | 35                 |
| MGI Expression: Detected | TS22_telencephalon                                                | 1.5017e-46       | 3.3544e-43 | 2.1486          | 1.6396e-37             | 2.6083          | 207                |
|                          | TS22_forebrain                                                    | 1.1983e-44       | 2.0074e-41 | 2.0055          | 8.3887e-42             | 2.5683          | 239                |
|                          | TS22_cerebral cortex                                              | 2.1689e-42       | 2.4223e-39 | 2.2038          | 1.3275e-28             | 2.4716          | 175                |
|                          | TS21_thalamus                                                     | 1.6637e-40       | 1.2387e-37 | 2.6833          | 2.0805e-30             | 3.4063          | 112                |
|                          | TS17_brain                                                        | 5.0178e-39       | 2.4017e-36 | 2.2089          | 3.9075e-39             | 3.0815          | 166                |
|                          | TS15_organ system                                                 | 7.2861e-39       | 2.8720e-36 | 2.1076          | 4.3027e-37             | 2.8306          | 179                |
|                          | TS21_embryo;head#                                                 | 9.3468e-38       | 3.4796e-35 | 2.1420          | 2.2480e-22             | 2.2335          | 168                |
|                          | TS15_central nervous system                                       | 1.1730e-36       | 4.1368e-34 | 2.4359          | 1.2084e-34             | 3.5177          | 122                |
|                          | TS17_forebrain                                                    | 2.8214e-36       | 9.0028e-34 | 2.5454          | 3.6953e-40             | 4.2094          | 113                |
|                          | TS15_nervous system                                               | 5.4168e-36       | 1.6498e-33 | 2.4117          | 8.1279e-34             | 3.4548          | 122                |
| InterPro                 | High mobility group, HMG1/HMG2                                    | 6.1670e-28       | 3.8735e-24 | 5.3934          | 0.0019                 | 3.6248          | 16                 |
|                          | Basic helix-loop-helix dimerisation region bHLH                   | 9.4465e-13       | 1.4833e-9  | 2.9176          | 0.0005                 | 2.7505          | 28                 |
|                          | Homeobox                                                          | 5.7525e-10       | 4.5164e-7  | 2.0233          | 4.7506e-8              | 2.6255          | 57                 |
|                          | Winged helix repressor DNA-binding                                | 1.4045e-7        | 7.3514e-5  | 2.0658          | 0.0220                 | 2.0239          | 33                 |
|                          | Helix-loop-helix DNA-binding                                      | 5.5638e-7        | 0.0002     | 2.5390          | 0.0376                 | 2.4814          | 19                 |
|                          | Transcription factor, fork head                                   | 1.4963e-5        | 0.0049     | 2.6182          | 0.0253                 | 3.2798          | 13                 |
|                          | Helix-turn-helix motif, lambda-like repressor                     | 0.0001           | 0.0233     | 2.3513          | 0.0062                 | 2.9294          | 19                 |

**Supplementary Table 20:** Enrichments for regions bound by p300 in mouse midbrain. **(a)** DAVID gene-based enrichments of genes with proximal p300 binding events. **(b)** GREAT *cis*-regulatory element enrichments for all regions bound by p300.

**a**

*No terms were found significant after multiple hypothesis correction in DAVID's gene-based test.*

**b**

**GREAT Enrichments of p300 Binding Peaks in Mouse Midbrain**

| Ontology                 | Term                                                | Binomial Results |            |                 | Hypergeometric Results |                 |                    |
|--------------------------|-----------------------------------------------------|------------------|------------|-----------------|------------------------|-----------------|--------------------|
|                          | Name                                                | Raw P-Value      | FDR Q-Val  | Fold Enrichment | FDR Q-Val              | Fold Enrichment | Observed Gene Hits |
| GO Biological Process    | nervous system development                          | 9.2743e-16       | 1.4032e-12 | 2.0118          | 1.1714e-21             | 3.0999          | 103                |
|                          | compartment specification                           | 7.5434e-11       | 4.8913e-8  | 56.6618         | 0.0003                 | 21.6390         | 4                  |
|                          | embryonic morphogenesis                             | 3.6243e-9        | 1.2654e-6  | 2.3118          | 1.8393e-5              | 2.5417          | 37                 |
|                          | neuron differentiation                              | 4.7647e-9        | 1.5448e-6  | 2.0688          | 2.3965e-11             | 3.2334          | 52                 |
|                          | central nervous system development                  | 7.4432e-9        | 2.2523e-6  | 2.1925          | 4.4324e-10             | 3.3121          | 45                 |
|                          | neural tube development                             | 6.8274e-8        | 1.8229e-5  | 3.7266          | 5.7239e-5              | 4.5716          | 15                 |
|                          | negative regulation of cell differentiation         | 4.5097e-7        | 6.8232e-5  | 2.5632          | 8.6419e-6              | 3.4024          | 25                 |
|                          | central nervous system neuron axonogenesis          | 6.7001e-7        | 8.9446e-5  | 6.3792          | 0.0012                 | 9.2739          | 6                  |
|                          | neuron fate commitment                              | 6.8025e-7        | 8.8218e-5  | 3.7782          | 6.5742e-5              | 5.6450          | 12                 |
|                          | Wnt receptor signaling pathway                      | 1.7775e-6        | 0.0002     | 3.0076          | 0.0126                 | 2.7742          | 15                 |
| Mouse Phenotype          | abnormal brain white matter morphology              | 3.1332e-15       | 1.8167e-11 | 3.5860          | 2.8509e-15             | 6.3976          | 34                 |
|                          | abnormal tract                                      | 3.3884e-14       | 9.8231e-11 | 3.5351          | 1.3403e-13             | 6.1542          | 31                 |
|                          | abnormal corpus callosum morphology                 | 1.0113e-12       | 1.1727e-9  | 4.1327          | 1.9290e-9              | 6.4003          | 21                 |
|                          | abnormal brain commissure morphology                | 1.0792e-12       | 1.0429e-9  | 3.5513          | 9.2371e-12             | 6.1500          | 27                 |
|                          | abnormal dorsal telencephalic commissure morphology | 1.5312e-12       | 1.2682e-9  | 4.0734          | 4.0557e-9              | 6.1408          | 21                 |
|                          | abnormal telencephalon morphology                   | 1.9685e-10       | 1.2681e-7  | 2.1070          | 1.1697e-11             | 2.9422          | 62                 |
|                          | abnormal neural tube morphology/development         | 7.1653e-10       | 3.7768e-7  | 2.2260          | 4.2634e-7              | 2.5710          | 48                 |
|                          | abnormal brain ventricle/choroid plexus morphology  | 1.7941e-9        | 8.6684e-7  | 2.7999          | 1.8626e-8              | 3.8047          | 32                 |
|                          | abnormal brain ventricle morphology                 | 2.4459e-9        | 1.0909e-6  | 3.0550          | 1.1960e-7              | 4.1675          | 26                 |
|                          | abnormal brain development                          | 2.8577e-9        | 1.1835e-6  | 2.0208          | 4.0864e-9              | 2.6755          | 57                 |
| PANTHER Pathway          | Notch signaling pathway                             | 1.2115e-7        | 1.8052e-5  | 6.7578          | 0.0010                 | 5.9016          | 9                  |
|                          | Cadherin signaling pathway                          | 3.2652e-5        | 0.0024     | 2.8019          | 0.0002                 | 4.1217          | 16                 |
|                          | Angiogenesis                                        | 0.0002           | 0.0098     | 2.2468          | 0.0221                 | 2.5272          | 16                 |
|                          | Alzheimer disease-presenilin pathway                | 0.0004           | 0.0167     | 2.5829          | 0.0191                 | 2.9847          | 12                 |
| MGI Expression: Detected | TS15_central nervous system                         | 1.5649e-18       | 1.0487e-14 | 2.6193          | 3.1569e-20             | 3.9906          | 71                 |
|                          | TS15_nervous system                                 | 2.3785e-18       | 7.9692e-15 | 2.6029          | 4.7789e-20             | 3.9193          | 71                 |
|                          | TS24_sensory organ                                  | 4.1014e-18       | 9.1611e-15 | 2.4085          | 2.5112e-11             | 2.4010          | 80                 |
|                          | TS21_diencephalon                                   | 1.7600e-17       | 2.9485e-14 | 2.5099          | 1.6111e-17             | 3.5381          | 69                 |
|                          | TS22_retina                                         | 4.2770e-17       | 5.7320e-14 | 2.1061          | 8.3204e-15             | 2.4640          | 101                |
|                          | TS21_thalamus                                       | 5.2927e-17       | 5.9110e-14 | 2.6515          | 3.7795e-17             | 3.7350          | 63                 |
|                          | TS15_future brain                                   | 8.4557e-17       | 8.0945e-14 | 2.7516          | 6.3490e-20             | 4.4617          | 60                 |
|                          | TS24_neural retina                                  | 1.3797e-16       | 1.1557e-13 | 2.7280          | 2.6578e-10             | 2.7049          | 59                 |
|                          | TS24_eye                                            | 6.5700e-16       | 4.0023e-13 | 2.3875          | 8.7481e-11             | 2.4567          | 73                 |
|                          | TS24_retina                                         | 4.2469e-15       | 1.6740e-12 | 2.4456          | 4.0265e-10             | 2.4868          | 67                 |
| InterPro                 | High mobility group, HMG1/HMG2                      | 7.2904e-7        | 0.0046     | 3.7610          | 0.0421                 | 4.4161          | 10                 |

**Supplementary Table 21:** “Gene-based GREAT” enrichments of all genes that possess a p300 midbrain binding peak within 2 kb of its transcription start site. Shown are the top ten hypergeometric enriched terms at a false discovery rate of 0.05.

| Ontology                 | Term                    | Hypergeometric Results |           |                    |
|--------------------------|-------------------------|------------------------|-----------|--------------------|
|                          | Name                    | Raw P-Value            | FDR Q-Val | Observed Gene Hits |
| Pathway Commons          | NOTCH                   | 0.0005                 | 0.0422    | 2                  |
| MGI Expression: Detected | TS17_rhombomere 04      | 7.2518e-6              | 0.0486    | 3                  |
|                          | TS19_future spinal cord | 7.9060e-6              | 0.0265    | 5                  |

**Supplementary Table 22:** GREAT enrichments of all p300 midbrain peaks using the *basal plus extension* association rule with a basal regulatory region extending 5 kb upstream and 1 kb downstream of the transcription start site and a maximum extension of 50 kb. Shown are the top ten binomial enriched terms at a false discovery rate of 0.05 with a fold enrichment of at least two that are also significant by the hypergeometric test.

| Ontology                 | Term                                          | Binomial Results |            |                 | Hypergeometric Results |                 |                    |
|--------------------------|-----------------------------------------------|------------------|------------|-----------------|------------------------|-----------------|--------------------|
|                          | Name                                          | Raw P-Value      | FDR Q-Val  | Fold Enrichment | FDR Q-Val              | Fold Enrichment | Observed Gene Hits |
| GO Biological Process    | compartment specification                     | 3.4224e-13       | 1.5534e-9  | 123.4873        | 3.2236e-5              | 69.1934         | 4                  |
|                          | nervous system development                    | 4.8803e-10       | 1.1076e-6  | 3.1246          | 1.3251e-6              | 3.3683          | 35                 |
|                          | pattern specification process                 | 6.7342e-9        | 1.0189e-5  | 4.8099          | 0.0006                 | 4.2418          | 16                 |
|                          | regionalization                               | 1.2986e-8        | 1.4736e-5  | 5.4395          | 0.0025                 | 4.4311          | 13                 |
|                          | neuron differentiation                        | 1.7491e-8        | 1.5878e-5  | 3.8738          | 0.0001                 | 3.9766          | 20                 |
|                          | neurogenesis                                  | 4.1338e-8        | 2.6005e-5  | 3.3627          | 0.0001                 | 3.4900          | 23                 |
|                          | generation of neurons                         | 4.7179e-8        | 2.6768e-5  | 3.4562          | 0.0002                 | 3.5484          | 22                 |
|                          | system development                            | 5.2215e-8        | 2.6334e-5  | 2.1244          | 1.0637e-5              | 2.2281          | 55                 |
|                          | negative regulation of neuron differentiation | 1.0694e-7        | 4.4127e-5  | 14.8047         | 0.0127                 | 11.5323         | 5                  |
|                          | anterior/posterior pattern formation          | 1.5514e-7        | 5.8681e-5  | 6.0353          | 0.0112                 | 4.8051          | 10                 |
| Mouse Phenotype          | abnormal nervous system development           | 1.0022e-11       | 5.8108e-8  | 3.3143          | 2.2649e-8              | 3.5790          | 39                 |
|                          | abnormal brain morphology                     | 2.6041e-10       | 7.5493e-7  | 2.8170          | 6.2619e-7              | 2.9624          | 42                 |
|                          | abnormal neurogenesis                         | 6.1625e-10       | 1.1910e-6  | 5.0043          | 1.6068e-5              | 5.2552          | 18                 |
|                          | increased cochlear outer hair cell number     | 5.3865e-8        | 7.8078e-5  | 21.6228         | 0.0203                 | 16.2809         | 4                  |
|                          | abnormal nervous system morphology            | 5.9841e-8        | 6.9391e-5  | 2.1497          | 1.1852e-5              | 2.3036          | 53                 |
|                          | abnormal neural tube morphology/development   | 8.5420e-8        | 8.2545e-5  | 3.5607          | 0.0001                 | 3.7680          | 22                 |
|                          | abnormal brain development                    | 1.2262e-7        | 0.0001     | 3.2921          | 0.0002                 | 3.4522          | 23                 |
|                          | abnormal cochlear inner hair cell number      | 1.4001e-7        | 0.0001     | 18.7499         | 0.0277                 | 13.8387         | 4                  |
|                          | increased cochlear hair cell number           | 2.7189e-7        | 0.0002     | 16.9722         | 0.0475                 | 11.5323         | 4                  |
|                          | fused dorsal root ganglion                    | 6.2119e-7        | 0.0003     | 32.5026         | 0.0332                 | 23.0645         | 3                  |
| PANTHER Pathway          | Notch signaling pathway                       | 9.7994e-8        | 1.4601e-5  | 14.9774         | 0.0154                 | 10.4839         | 5                  |
| MGI Expression: Detected | TS19_nervous system                           | 5.4084e-15       | 3.6241e-11 | 5.2381          | 4.2400e-11             | 5.8474          | 30                 |
|                          | TS19_central nervous system                   | 5.6423e-15       | 1.8905e-11 | 5.4007          | 3.0586e-11             | 6.0078          | 29                 |
|                          | TS19_future spinal cord                       | 6.3614e-15       | 1.4209e-11 | 7.4921          | 2.3349e-11             | 8.6492          | 22                 |
|                          | TS15_future spinal cord                       | 2.0744e-13       | 3.4752e-10 | 7.1151          | 3.9904e-9              | 7.3221          | 20                 |
|                          | TS15_future spinal cord;neural tube           | 2.6184e-13       | 3.5091e-10 | 7.9228          | 6.3456e-9              | 8.0876          | 18                 |
|                          | TS19_future spinal cord;neural tube           | 3.6644e-13       | 4.0925e-10 | 8.3203          | 3.1185e-9              | 9.5634          | 17                 |
|                          | TS13_embryo;ectoderm                          | 4.5789e-13       | 4.3833e-10 | 5.6744          | 5.0055e-9              | 5.9629          | 23                 |
|                          | TS13_embryo;ectoderm;neural ectoderm          | 7.3679e-13       | 6.1631e-10 | 5.7982          | 9.1865e-9              | 6.0648          | 22                 |
|                          | TS20_spinal cord                              | 1.5525e-12       | 1.1559e-9  | 5.6102          | 3.7434e-8              | 5.5965          | 22                 |
|                          | TS15_central nervous system                   | 1.7154e-12       | 1.1495e-9  | 4.6585          | 3.6061e-9              | 5.0323          | 28                 |

**Supplementary Table 23:** GREAT enrichments of all p300 midbrain peaks using the *two nearest genes* association rule with a maximum extension of 1 Mb. Shown are the top ten binomial enriched terms at a false discovery rate of 0.05 with a fold enrichment of at least two that are also significant by the hypergeometric test.

| Ontology                 | Term                                                | Binomial Results |            |                 | Hypergeometric Results |                 |                    |
|--------------------------|-----------------------------------------------------|------------------|------------|-----------------|------------------------|-----------------|--------------------|
|                          | Name                                                | Raw P-Value      | FDR Q-Val  | Fold Enrichment | FDR Q-Val              | Fold Enrichment | Observed Gene Hits |
| GO Biological Process    | nervous system development                          | 8.9282e-16       | 1.3508e-12 | 2.0057          | 4.2823e-21             | 3.0289          | 104                |
|                          | compartment specification                           | 1.1039e-10       | 6.2625e-8  | 53.6168         | 0.0003                 | 20.9402         | 4                  |
|                          | embryonic morphogenesis                             | 2.2034e-9        | 1.0001e-6  | 2.3233          | 1.5125e-5              | 2.5261          | 38                 |
|                          | neuron differentiation                              | 7.1913e-9        | 2.3315e-6  | 2.0481          | 8.7222e-11             | 3.1290          | 52                 |
|                          | central nervous system development                  | 1.1010e-8        | 3.3317e-6  | 2.1693          | 1.3647e-9              | 3.2051          | 45                 |
|                          | neural tube development                             | 8.3610e-8        | 1.6500e-5  | 3.6850          | 8.4892e-5              | 4.4240          | 15                 |
|                          | negative regulation of cell differentiation         | 2.1678e-7        | 3.0750e-5  | 2.6025          | 5.0347e-6              | 3.4242          | 26                 |
|                          | central nervous system neuron axonogenesis          | 7.2944e-7        | 8.0755e-5  | 6.3268          | 0.0014                 | 8.9744          | 6                  |
|                          | neuron fate commitment                              | 7.9073e-7        | 8.1571e-5  | 3.7408          | 9.2964e-5              | 5.4627          | 12                 |
|                          | Wnt receptor signaling pathway                      | 2.2642e-6        | 0.0002     | 2.9659          | 0.0173                 | 2.6846          | 15                 |
| GO Cellular Component    | axon                                                | 0.0013           | 0.0469     | 2.2162          | 0.0441                 | 3.3198          | 13                 |
| Mouse Phenotype          | abnormal brain white matter morphology              | 4.2983e-15       | 2.4922e-11 | 3.5574          | 7.8448e-15             | 6.1910          | 34                 |
|                          | abnormal tract                                      | 4.5586e-14       | 1.3215e-10 | 3.5070          | 4.1825e-13             | 5.9555          | 31                 |
|                          | abnormal corpus callosum morphology                 | 1.2667e-12       | 1.4689e-9  | 4.1004          | 3.5900e-9              | 6.1936          | 21                 |
|                          | abnormal brain commissure morphology                | 1.3814e-12       | 1.3349e-9  | 3.5245          | 1.7899e-11             | 5.9514          | 27                 |
|                          | abnormal dorsal telencephalic commissure morphology | 1.9284e-12       | 1.5973e-9  | 4.0408          | 7.0441e-9              | 5.9425          | 21                 |
|                          | abnormal telencephalon morphology                   | 1.4640e-10       | 9.4317e-8  | 2.1081          | 1.9582e-11             | 2.8931          | 63                 |
|                          | abnormal brain ventricle/choroid plexus morphology  | 8.1425e-10       | 4.2918e-7  | 2.8331          | 9.9391e-9              | 3.7968          | 33                 |
|                          | abnormal brain ventricle morphology                 | 9.7071e-10       | 4.6901e-7  | 3.1040          | 4.8994e-8              | 4.1880          | 27                 |
|                          | abnormal neural tube morphology/development         | 1.2455e-9        | 5.5549e-7  | 2.1960          | 1.1836e-6              | 2.4879          | 48                 |
|                          | abnormal brain development                          | 2.1990e-9        | 9.1072e-7  | 2.0215          | 5.6241e-9              | 2.6346          | 58                 |
| PANTHER Pathway          | Notch signaling pathway                             | 1.4854e-7        | 2.2132e-5  | 6.6365          | 0.0008                 | 5.7110          | 9                  |
|                          | Cadherin signaling pathway                          | 1.1926e-5        | 0.0009     | 2.9131          | 5.5533e-5              | 4.2379          | 17                 |
|                          | Alzheimer disease-presenilin pathway                | 0.0002           | 0.0090     | 2.7017          | 0.0088                 | 3.1290          | 13                 |
|                          | Angiogenesis                                        | 0.0002           | 0.0091     | 2.2151          | 0.0251                 | 2.4456          | 16                 |
| MGI Expression: Detected | TS15_central nervous system                         | 1.0221e-18       | 6.8491e-15 | 2.6191          | 4.4268e-20             | 3.9161          | 72                 |
|                          | TS15_nervous system                                 | 1.5796e-18       | 5.2926e-15 | 2.6023          | 6.7759e-20             | 3.8462          | 72                 |
|                          | TS24_sensory organ                                  | 1.1608e-17       | 2.5928e-14 | 2.3738          | 4.9774e-11             | 2.3525          | 81                 |
|                          | TS21_diencephalon                                   | 1.2949e-17       | 2.1693e-14 | 2.5063          | 1.7240e-18             | 3.5727          | 72                 |
|                          | TS21_thalamus                                       | 3.5516e-17       | 4.7599e-14 | 2.6502          | 3.0790e-18             | 3.7864          | 66                 |
|                          | TS15_future brain                                   | 4.7966e-17       | 5.3570e-14 | 2.7571          | 1.0055e-19             | 4.3895          | 61                 |
|                          | TS22_retina                                         | 5.0541e-17       | 4.8382e-14 | 2.0938          | 2.0399e-14             | 2.4080          | 102                |
|                          | TS24_neural retina                                  | 3.1346e-16       | 2.3339e-13 | 2.6888          | 3.1730e-10             | 2.6619          | 60                 |
|                          | TS21_hindbrain                                      | 1.3880e-15       | 8.4552e-13 | 2.1289          | 1.5626e-14             | 2.5523          | 93                 |
|                          | TS24_eye                                            | 1.6077e-15       | 8.2888e-13 | 2.3539          | 1.4690e-10             | 2.4099          | 74                 |

**Supplementary Table 24:** GREAT enrichments of all p300 midbrain peaks using the *single nearest gene* association rule with a maximum extension of 1 Mb. Shown are the top ten binomial enriched terms at a false discovery rate of 0.05 with a fold enrichment of at least two that are also significant by the hypergeometric test.

| Ontology                 | Term                                                                                                                                                | Binomial Results |            |                 | Hypergeometric Results |                 |                    |
|--------------------------|-----------------------------------------------------------------------------------------------------------------------------------------------------|------------------|------------|-----------------|------------------------|-----------------|--------------------|
|                          | Name                                                                                                                                                | Raw P-Value      | FDR Q-Val  | Fold Enrichment | FDR Q-Val              | Fold Enrichment | Observed Gene Hits |
| GO Biological Process    | nervous system development                                                                                                                          | 8.1472e-12       | 3.6980e-8  | 2.1354          | 1.6451e-17             | 3.6263          | 70                 |
|                          | compartment specification                                                                                                                           | 9.8991e-11       | 1.4977e-7  | 91.9146         | 0.0037                 | 27.9350         | 3                  |
|                          | neuron fate commitment                                                                                                                              | 2.3139e-9        | 1.5004e-6  | 6.0968          | 5.2404e-6              | 8.9068          | 11                 |
|                          | embryonic morphogenesis                                                                                                                             | 1.6608e-8        | 9.4230e-6  | 2.7479          | 1.6886e-5              | 3.1926          | 27                 |
|                          | regionalization                                                                                                                                     | 2.0593e-8        | 1.0366e-5  | 3.4995          | 5.9249e-5              | 3.6696          | 20                 |
|                          | cell fate commitment                                                                                                                                | 2.0981e-8        | 9.5233e-6  | 3.4021          | 1.6037e-6              | 5.0549          | 19                 |
|                          | central nervous system development                                                                                                                  | 4.5272e-8        | 1.8681e-5  | 2.5354          | 8.3451e-9              | 4.0541          | 32                 |
|                          | negative regulation of neuron differentiation                                                                                                       | 9.9073e-8        | 3.7474e-5  | 6.2662          | 8.2796e-7              | 12.4156         | 10                 |
|                          | neurogenesis                                                                                                                                        | 1.2379e-7        | 4.0134e-5  | 2.1030          | 2.0751e-9              | 3.4306          | 42                 |
|                          | anterior/posterior pattern formation                                                                                                                | 1.4783e-7        | 4.4733e-5  | 3.9935          | 0.0004                 | 3.6799          | 15                 |
| Mouse Phenotype          | abnormal nervous system development                                                                                                                 | 2.8409e-13       | 1.6471e-9  | 2.2967          | 1.2369e-12             | 3.1615          | 64                 |
|                          | abnormal neural tube morphology/development                                                                                                         | 9.0074e-12       | 2.6112e-8  | 2.9090          | 1.9678e-7              | 3.3190          | 36                 |
|                          | abnormal brain white matter morphology                                                                                                              | 5.0400e-11       | 9.7406e-8  | 3.8622          | 3.8731e-9              | 6.8016          | 21                 |
|                          | abnormal neural tube closure                                                                                                                        | 2.3581e-10       | 2.7344e-7  | 3.4734          | 4.0347e-5              | 3.6419          | 22                 |
|                          | abnormal tract                                                                                                                                      | 2.4894e-10       | 2.4056e-7  | 3.8179          | 6.9999e-8              | 6.4926          | 19                 |
|                          | abnormal brain development                                                                                                                          | 1.4844e-9        | 1.2295e-6  | 2.4364          | 1.8183e-7              | 3.1510          | 39                 |
|                          | abnormal corpus callosum morphology                                                                                                                 | 1.9512e-9        | 1.4141e-6  | 4.5107          | 1.2394e-5              | 6.8198          | 13                 |
|                          | abnormal dorsal telencephalic commissure morphology                                                                                                 | 2.4743e-9        | 1.5940e-6  | 4.4549          | 1.8942e-5              | 6.5434          | 13                 |
|                          | abnormal brain commissure morphology                                                                                                                | 4.6744e-9        | 2.7102e-6  | 3.7568          | 3.1765e-7              | 6.6652          | 17                 |
|                          | abnormal neurogenesis                                                                                                                               | 5.1836e-9        | 2.7322e-6  | 2.7803          | 9.1146e-9              | 4.5576          | 29                 |
| PANTHER Pathway          | Angiogenesis                                                                                                                                        | 0.0006           | 0.0476     | 2.5886          | 0.0041                 | 3.5344          | 13                 |
| MSigDB Pathway           | Presenilin is required for gamma-secretase activity to activate Notch signaling; presenilin also inhibits beta-catenin in the Wnt/Frizzled pathway. | 3.6052e-8        | 1.6440e-5  | 17.0943         | 0.1379                 | 11.4606         | 4                  |
| MGI Expression: Detected | TS22_retina                                                                                                                                         | 4.3275e-16       | 2.8996e-12 | 2.4928          | 6.2062e-13             | 2.8554          | 68                 |
|                          | TS19_central nervous system                                                                                                                         | 7.9398e-15       | 2.6602e-11 | 2.9376          | 2.1571e-20             | 5.8874          | 51                 |
|                          | TS19_nervous system                                                                                                                                 | 9.8206e-15       | 2.1936e-11 | 2.8668          | 2.7272e-20             | 5.4559          | 52                 |
|                          | TS15_future spinal cord                                                                                                                             | 2.3211e-14       | 3.8885e-11 | 3.9851          | 1.9413e-14             | 6.3063          | 32                 |
|                          | TS15_future brain                                                                                                                                   | 6.4296e-14       | 8.6170e-11 | 3.1026          | 8.6337e-18             | 5.6318          | 44                 |
|                          | TS15_central nervous system                                                                                                                         | 7.8037e-14       | 8.7154e-11 | 2.8232          | 6.9668e-17             | 4.7405          | 49                 |
|                          | TS15_nervous system                                                                                                                                 | 1.2209e-13       | 1.1888e-10 | 2.7952          | 1.3408e-16             | 4.8559          | 49                 |
|                          | TS21_thalamus                                                                                                                                       | 2.3139e-13       | 1.7226e-10 | 2.9710          | 7.8886e-18             | 5.0003          | 49                 |
|                          | TS22_eye                                                                                                                                            | 2.8938e-13       | 1.7629e-10 | 2.1732          | 3.0439e-12             | 2.6126          | 74                 |
|                          | TS24_sensory organ                                                                                                                                  | 2.9306e-13       | 1.6365e-10 | 2.6174          | 2.5565e-11             | 2.9446          | 57                 |
| InterPro                 | High mobility group, HMG1/HMG2                                                                                                                      | 4.6040e-5        | 0.0482     | 4.1617          | 0.0018                 | 7.6014          | 10                 |

**Supplementary Table 25:** GREAT enrichments for regions bound by p300 in mouse embryonic stem cells. **(a)** DAVID gene-based enrichments of genes with proximal p300 binding events. **(b)** GREAT *cis*-regulatory element enrichments for all regions bound by p300.

**a**

*No terms were found significant after multiple hypothesis correction in DAVID's gene-based test.*

**b**

**GREAT Enrichments of p300 Binding Peaks in Mouse Embryonic Stem Cells**

| Ontology                            | Term                                                                                                                                                                             | Binomial Results |            |                 | Hypergeometric Results |                 |                    |
|-------------------------------------|----------------------------------------------------------------------------------------------------------------------------------------------------------------------------------|------------------|------------|-----------------|------------------------|-----------------|--------------------|
|                                     | Name                                                                                                                                                                             | Raw P-Value      | FDR Q-Val  | Fold Enrichment | FDR Q-Val              | Fold Enrichment | Observed Gene Hits |
| GO Molecular Function               | chromatin binding                                                                                                                                                                | 8.9388e-6        | 0.0053     | 2.8029          | 0.0430                 | 2.7963          | 16                 |
|                                     | N-acetylglucosamine-6-sulfatase activity                                                                                                                                         | 9.4269e-5        | 0.0321     | 11.3650         | 0.0365                 | 20.0988         | 3                  |
|                                     | arylsulfatase activity                                                                                                                                                           | 0.0001           | 0.0438     | 10.3091         | 0.0365                 | 20.0988         | 3                  |
| GO Biological Process               | stem cell differentiation                                                                                                                                                        | 5.7696e-10       | 2.6188e-6  | 8.5655          | 0.0014                 | 6.6996          | 8                  |
|                                     | stem cell maintenance                                                                                                                                                            | 9.4722e-10       | 2.1497e-6  | 9.1341          | 0.0020                 | 7.4048          | 7                  |
|                                     | regulation of transport                                                                                                                                                          | 4.7020e-6        | 0.0006     | 2.6468          | 0.0030                 | 2.4864          | 24                 |
|                                     | anatomical structure homeostasis                                                                                                                                                 | 5.9911e-6        | 0.0008     | 3.1457          | 0.0184                 | 2.8712          | 14                 |
|                                     | negative regulation of transcription, DNA-dependent                                                                                                                              | 2.2051e-5        | 0.0027     | 2.1161          | 0.0002                 | 2.5961          | 31                 |
|                                     | negative regulation of RNA metabolic process                                                                                                                                     | 2.3123e-5        | 0.0028     | 2.1114          | 0.0002                 | 2.5746          | 31                 |
|                                     | lens morphogenesis in camera-type eye                                                                                                                                            | 0.0002           | 0.0141     | 4.5447          | 0.0106                 | 8.3745          | 5                  |
|                                     | regulation of exocytosis                                                                                                                                                         | 0.0003           | 0.0197     | 5.5958          | 0.0279                 | 5.4815          | 6                  |
|                                     | salivary gland development                                                                                                                                                       | 0.0004           | 0.0233     | 5.4270          | 0.0018                 | 9.2763          | 6                  |
| regulation of cellular localization | 0.0004                                                                                                                                                                           | 0.0254           | 2.8053     | 0.0188          | 3.0033                 | 13              |                    |
| MGI Expression: Detected            | Theiler_stage_4                                                                                                                                                                  | 9.7259e-14       | 6.5173e-10 | 2.0894          | 2.3351e-6              | 1.9010          | 96                 |
|                                     | TS4_embryo                                                                                                                                                                       | 1.2640e-13       | 4.2351e-10 | 2.0903          | 3.3447e-6              | 1.8780          | 94                 |
|                                     | TS4_extraembryonic component                                                                                                                                                     | 2.7494e-13       | 6.1412e-10 | 2.0934          | 3.8689e-6              | 1.8875          | 91                 |
|                                     | TS4_inner cell mass                                                                                                                                                              | 6.8093e-13       | 1.1407e-9  | 2.1335          | 3.6068e-6              | 1.9428          | 84                 |
|                                     | TS4_compacted morula                                                                                                                                                             | 1.6680e-12       | 2.2355e-9  | 2.3158          | 0.0001                 | 1.8651          | 67                 |
|                                     | Theiler_stage_2                                                                                                                                                                  | 4.9740e-12       | 5.5551e-9  | 2.0815          | 8.3133e-6              | 1.8850          | 83                 |
|                                     | TS4_zona pellucida                                                                                                                                                               | 7.4298e-12       | 6.2234e-9  | 2.2925          | 0.0002                 | 1.8402          | 64                 |
|                                     | TS4_second polar body                                                                                                                                                            | 7.4298e-12       | 6.2234e-9  | 2.2925          | 0.0002                 | 1.8402          | 64                 |
|                                     | TS2B_oocyte                                                                                                                                                                      | 3.3623e-11       | 2.2531e-8  | 2.0108          | 2.7026e-5              | 1.8418          | 80                 |
| TS5_inner cell mass                 | 3.8743e-11                                                                                                                                                                       | 2.3601e-8        | 2.1867     | 3.1103e-5       | 1.9594                 | 66              |                    |
| Predicted Promoter Motifs           | Genes with promoter regions [-2kb,2kb] around transcription start site containing the motif SNNNCCNCAGGCN which matches annotation for GTF3A: general transcription factor IIIA  | 0.0001           | 0.0294     | 2.2094          | 0.0088                 | 2.0662          | 22                 |
|                                     | Genes with promoter regions [-2kb,2kb] around transcription start site containing the motif NNGGGNCGCAGCTGCGNCCNN which matches annotation for NHLH1: nescent helix loop helix 1 | 0.0004           | 0.0440     | 2.2420          | 0.0006                 | 2.8712          | 21                 |

**Supplementary Table 26:** “Gene-based GREAT” enrichments of all genes that possess a p300 binding peak in mouse embryonic stem cells within 2 kb of its transcription start site. Shown are the top ten hypergeometric enriched terms at a false discovery rate of 0.05.

| Ontology                     | Term                                                                                                                                                                         | Hypergeometric Results |           |                    |
|------------------------------|------------------------------------------------------------------------------------------------------------------------------------------------------------------------------|------------------------|-----------|--------------------|
|                              | Name                                                                                                                                                                         | Raw P-Value            | FDR Q-Val | Observed Gene Hits |
| GO Biological Process        | stem cell differentiation                                                                                                                                                    | 9.9234e-6              | 0.0450    | 3                  |
| Mouse Phenotype              | gastrointestinal ulcer                                                                                                                                                       | 4.0296e-6              | 0.0234    | 3                  |
|                              | decreased embryo size                                                                                                                                                        | 8.7452e-6              | 0.0254    | 7                  |
|                              | abnormal embryo size                                                                                                                                                         | 9.5616e-6              | 0.0185    | 7                  |
|                              | digestive/alimentary phenotype                                                                                                                                               | 1.9548e-5              | 0.0283    | 9                  |
|                              | abnormal large intestine morphology                                                                                                                                          | 3.3942e-5              | 0.0394    | 4                  |
| MGI Expression: Detected     | TS21_ovary;primordial germ cells                                                                                                                                             | 2.7721e-6              | 0.0186    | 3                  |
|                              | TS21_testis;primordial germ cells                                                                                                                                            | 7.5685e-6              | 0.0254    | 3                  |
| MSigDB Perturbation          | Downregulated in MES cells from elongin-A knockout mice                                                                                                                      | 8.1473e-6              | 0.0020    | 5                  |
| Transcription Factor Targets | Targets of Foxp3, identified by ChIP-chip in Foxp3-CD4+ T-cell hybridomas that were transduced with FLAG-tagged Foxp3 and stimulated by phorbol myristate acetate/ionomycin. | 0.0060                 | 0.0360    | 6                  |

**Supplementary Table 27:** GREAT enrichments of all p300 binding peaks in mouse embryonic stem cells using the *basal plus extension* association rule with a basal regulatory region extending 5 kb upstream and 1 kb downstream of the transcription start site and a maximum extension of 50 kb. Shown are the top ten binomial enriched terms at a false discovery rate of 0.05 with a fold enrichment of at least two that are also significant by the hypergeometric test.

| Ontology                  | Term                                                                                                                                                                                          | Binomial Results |            |                 | Hypergeometric Results |                 |                    |
|---------------------------|-----------------------------------------------------------------------------------------------------------------------------------------------------------------------------------------------|------------------|------------|-----------------|------------------------|-----------------|--------------------|
|                           | Name                                                                                                                                                                                          | Raw P-Value      | FDR Q-Val  | Fold Enrichment | FDR Q-Val              | Fold Enrichment | Observed Gene Hits |
| GO Molecular Function     | protein binding                                                                                                                                                                               | 3.0335e-20       | 3.6098e-17 | 2.1427          | 0.0026                 | 1.3996          | 149                |
|                           | nucleic acid binding                                                                                                                                                                          | 9.2792e-15       | 7.3615e-12 | 2.5578          | 0.0280                 | 1.5509          | 77                 |
|                           | DNA binding                                                                                                                                                                                   | 1.4548e-14       | 8.6560e-12 | 2.8909          | 0.0079                 | 1.7534          | 61                 |
| GO Biological Process     | regulation of biological process                                                                                                                                                              | 1.7971e-19       | 4.0786e-16 | 2.0383          | 0.0366                 | 1.2585          | 165                |
|                           | regulation of cellular process                                                                                                                                                                | 3.7840e-19       | 4.2939e-16 | 2.0565          | 0.0327                 | 1.2723          | 160                |
|                           | developmental process                                                                                                                                                                         | 2.1366e-18       | 1.9396e-15 | 2.5470          | 0.0005                 | 1.6736          | 96                 |
|                           | multicellular organismal development                                                                                                                                                          | 3.1273e-15       | 2.3658e-12 | 2.5521          | 0.0012                 | 1.7283          | 80                 |
|                           | regulation of cellular metabolic process                                                                                                                                                      | 1.1133e-14       | 7.2192e-12 | 2.5121          | 0.0078                 | 1.6301          | 80                 |
|                           | regulation of metabolic process                                                                                                                                                               | 5.6911e-14       | 3.2290e-11 | 2.4208          | 0.0172                 | 1.5681          | 81                 |
|                           | regulation of cellular biosynthetic process                                                                                                                                                   | 4.3273e-13       | 2.1824e-10 | 2.4841          | 0.0160                 | 1.6008          | 72                 |
|                           | regulation of biosynthetic process                                                                                                                                                            | 4.7411e-13       | 2.1520e-10 | 2.4795          | 0.0154                 | 1.5978          | 72                 |
|                           | regulation of nucleobase, nucleoside, nucleotide and nucleic acid metabolic process                                                                                                           | 1.5776e-12       | 5.5083e-10 | 2.4755          | 0.0292                 | 1.5756          | 68                 |
|                           | regulation of macromolecule metabolic process                                                                                                                                                 | 6.0619e-12       | 1.7197e-9  | 2.3181          | 0.0383                 | 1.4950          | 74                 |
| MGI Expression: Detected  | TS17_organ system                                                                                                                                                                             | 6.4094e-20       | 4.2949e-16 | 2.9919          | 0.0002                 | 1.8456          | 77                 |
|                           | Theiler_stage_17                                                                                                                                                                              | 1.1317e-19       | 3.7917e-16 | 2.7292          | 0.0002                 | 1.7034          | 89                 |
|                           | TS17_embryo                                                                                                                                                                                   | 1.3942e-19       | 3.1143e-16 | 2.7396          | 0.0002                 | 1.7155          | 88                 |
|                           | TS28_visceral organ                                                                                                                                                                           | 2.2937e-17       | 2.5617e-14 | 2.2499          | 0.0024                 | 1.4217          | 114                |
|                           | TS21_embryo                                                                                                                                                                                   | 1.4383e-16       | 1.3769e-13 | 2.5277          | 0.0008                 | 1.6138          | 85                 |
|                           | TS4_inner cell mass                                                                                                                                                                           | 1.5124e-16       | 1.2668e-13 | 3.9928          | 0.0002                 | 2.4501          | 45                 |
|                           | TS21_organ system                                                                                                                                                                             | 2.5475e-16       | 1.8967e-13 | 2.7098          | 0.0005                 | 1.7239          | 74                 |
|                           | Theiler_stage_21                                                                                                                                                                              | 2.7409e-16       | 1.8367e-13 | 2.5013          | 0.0010                 | 1.5906          | 85                 |
|                           | TS15_embryo                                                                                                                                                                                   | 4.4056e-16       | 2.6838e-13 | 3.1488          | 0.0004                 | 1.9700          | 57                 |
|                           | TS17_nervous system                                                                                                                                                                           | 1.2210e-15       | 6.8182e-13 | 2.8960          | 0.0006                 | 1.8003          | 64                 |
| MSigDB Perturbation       | Downregulated in MES cells from elongin-A knockout mice                                                                                                                                       | 2.4658e-15       | 6.1151e-13 | 9.3446          | 2.8464e-7              | 5.6538          | 19                 |
|                           | Enriched in mouse embryonic stem cells, compared to differentiated brain and bone marrow cells                                                                                                | 8.4647e-10       | 1.0496e-7  | 2.7101          | 0.0181                 | 1.7640          | 45                 |
|                           | Trans-regulated hematopoietic stem cell (HSC) transcripts detected in bone marrow tissue (high likelihood ratio statistic (LRS) value and genome-wide linkage P < 0.005)                      | 1.5634e-8        | 1.2924e-6  | 2.9450          | 0.0224                 | 1.8754          | 35                 |
|                           | Down-regulated in brown preadipocytes from Irs1-knockout mice, which display severe defects in adipocyte differentiation, versus wild-type controls                                           | 5.9293e-5        | 0.0015     | 5.3965          | 0.0222                 | 4.0944          | 9                  |
| Predicted Promoter Motifs | Genes with promoter regions [-2kb,2kb] around transcription start site containing the motif CTTTGT which matches annotation for LEF1: lymphoid enhancer-binding factor 1                      | 1.7633e-12       | 1.0844e-9  | 2.6744          | 8.0264e-5              | 1.9714          | 63                 |
|                           | Genes with promoter regions [-2kb,2kb] around transcription start site containing motif CANCCNNWGGTGDGSG. Motif does not match any known transcription factor                                 | 7.0762e-6        | 0.0004     | 4.3290          | 0.0375                 | 3.1096          | 14                 |
|                           | Genes with promoter regions [-2kb,2kb] around transcription start site containing motif ACTWSNACTNY. Motif does not match any known transcription factor                                      | 2.0446e-5        | 0.0008     | 8.7267          | 0.0403                 | 5.5199          | 7                  |
|                           | Genes with promoter regions [-2kb,2kb] around transcription start site containing the motif NNNNTCYN which matches annotation for STAT5A: signal transducer and activator of transcription 5A | 2.6474e-5        | 0.0009     | 4.4089          | 0.0423                 | 3.5934          | 12                 |



**Supplementary Table 28:** GREAT enrichments of all p300 binding peaks in mouse embryonic stem cells using the *two nearest genes* association rule with a maximum extension of 1 Mb. Shown are the top ten binomial enriched terms at a false discovery rate of 0.05 with a fold enrichment of at least two that are also significant by the hypergeometric test.

| Ontology                  | Term                                                                                                                                                                                                                              | Binomial Results |            |                 | Hypergeometric Results |                 |                    |
|---------------------------|-----------------------------------------------------------------------------------------------------------------------------------------------------------------------------------------------------------------------------------|------------------|------------|-----------------|------------------------|-----------------|--------------------|
|                           | Name                                                                                                                                                                                                                              | Raw P-Value      | FDR Q-Val  | Fold Enrichment | FDR Q-Val              | Fold Enrichment | Observed Gene Hits |
| GO Molecular Function     | N-acetylglucosamine-6-sulfatase activity                                                                                                                                                                                          | 9.6114e-5        | 0.0286     | 11.3076         | 0.0421                 | 19.1741         | 3                  |
|                           | arylsulfatase activity                                                                                                                                                                                                            | 0.0001           | 0.0397     | 10.2700         | 0.0421                 | 19.1741         | 3                  |
| GO Biological Process     | stem cell differentiation                                                                                                                                                                                                         | 6.9247e-10       | 3.9289e-7  | 8.4398          | 0.0019                 | 6.3914          | 8                  |
|                           | stem cell maintenance                                                                                                                                                                                                             | 1.1038e-9        | 5.5669e-7  | 9.0239          | 0.0028                 | 7.0642          | 7                  |
|                           | regulation of transport                                                                                                                                                                                                           | 2.2954e-6        | 0.0003     | 2.6928          | 0.0026                 | 2.4709          | 25                 |
|                           | anatomical structure homeostasis                                                                                                                                                                                                  | 7.3617e-6        | 0.0009     | 3.1024          | 0.0275                 | 2.7392          | 14                 |
|                           | negative regulation of transcription, DNA-dependent                                                                                                                                                                               | 2.9547e-5        | 0.0031     | 2.0866          | 0.0005                 | 2.4767          | 31                 |
|                           | negative regulation of RNA metabolic process                                                                                                                                                                                      | 3.1006e-5        | 0.0032     | 2.0818          | 0.0005                 | 2.4562          | 31                 |
|                           | regulation of cellular localization                                                                                                                                                                                               | 0.0002           | 0.0109     | 2.9474          | 0.0109                 | 3.0855          | 14                 |
|                           | lens morphogenesis in camera-type eye                                                                                                                                                                                             | 0.0002           | 0.0143     | 4.5125          | 0.0136                 | 7.9892          | 5                  |
|                           | regulation of secretion                                                                                                                                                                                                           | 0.0003           | 0.0160     | 2.9337          | 0.0453                 | 2.6803          | 13                 |
|                           | regulation of exocytosis                                                                                                                                                                                                          | 0.0003           | 0.0193     | 5.5041          | 0.0340                 | 5.2293          | 6                  |
| MGI Expression: Detected  | Theiler_stage_4                                                                                                                                                                                                                   | 1.2304e-13       | 8.2447e-10 | 2.0725          | 5.2306e-6              | 1.8324          | 97                 |
|                           | TS4_embryo                                                                                                                                                                                                                        | 1.5893e-13       | 5.3057e-10 | 2.0736          | 9.9722e-6              | 1.8107          | 95                 |
|                           | TS4_extraembryonic component                                                                                                                                                                                                      | 3.3193e-13       | 7.4143e-10 | 2.0775          | 1.0436e-5              | 1.8205          | 92                 |
|                           | TS4_compacted morula                                                                                                                                                                                                              | 1.6333e-12       | 2.7362e-9  | 2.3015          | 0.0002                 | 1.8059          | 68                 |
|                           | TS4_inner cell mass                                                                                                                                                                                                               | 1.8117e-12       | 2.4280e-9  | 2.0978          | 1.3487e-5              | 1.8534          | 84                 |
|                           | Theiler_stage_2                                                                                                                                                                                                                   | 5.3625e-12       | 5.9891e-9  | 2.0685          | 2.0237e-5              | 1.8199          | 84                 |
|                           | TS4_zona pellucida                                                                                                                                                                                                                | 7.0420e-12       | 5.8986e-9  | 2.2797          | 0.0004                 | 1.7830          | 65                 |
|                           | TS4_second polar body                                                                                                                                                                                                             | 7.0420e-12       | 5.8986e-9  | 2.2797          | 0.0004                 | 1.7830          | 65                 |
|                           | TS3_zona pellucida                                                                                                                                                                                                                | 7.2609e-11       | 4.8655e-8  | 2.0516          | 0.0007                 | 1.6743          | 73                 |
|                           | TS5_inner cell mass                                                                                                                                                                                                               | 8.5820e-11       | 4.7923e-8  | 2.1506          | 0.0001                 | 1.8693          | 66                 |
| Predicted Promoter Motifs | Genes with promoter regions [-2kb,2kb] around transcription start site containing the motif NNGGGNCGCAGCTGCGNCCNN which matches annotation for NHLH1: nescient helix loop helix 1                                                 | 0.0002           | 0.0278     | 2.3044          | 0.0005                 | 2.8696          | 22                 |
|                           | Genes with promoter regions [-2kb,2kb] around transcription start site containing the motif SNNCCNCAGGCN which matches annotation for GTF3A: general transcription factor IIIA                                                    | 0.0002           | 0.0229     | 2.1730          | 0.0136                 | 1.9712          | 22                 |
|                           | Genes with promoter regions [-2kb,2kb] around transcription start site containing motif NRCCACGTGASN. Motif does not match any known transcription factor                                                                         | 0.0004           | 0.0322     | 2.3173          | 0.0431                 | 1.8312          | 17                 |
|                           | Genes with promoter regions [-2kb,2kb] around transcription start site containing the motif NANCACGTGNNW which matches annotation for MYC: v-myc myelocytomatosis viral oncogene homolog (avian)<br> MAX: MYC associated factor X | 0.0004           | 0.0301     | 2.0545          | 0.0035                 | 2.2339          | 24                 |
|                           | Genes with promoter regions [-2kb,2kb] around transcription start site containing the motif NNANACGTGNTNN which matches annotation for MAX: MYC associated factor X                                                               | 0.0007           | 0.0437     | 2.1740          | 0.0325                 | 1.8399          | 19                 |
|                           | Genes with promoter regions [-2kb,2kb] around transcription start site containing motif CTCTAAAAATAACYCY. Motif does not match any known transcription factor                                                                     | 0.0008           | 0.0442     | 2.1134          | 0.0013                 | 2.9499          | 18                 |
|                           | Genes with promoter regions [-2kb,2kb] around transcription start site containing motif NNWWWNGMCGTCATYNYWNNN. Motif does not match any known transcription factor                                                                | 0.0009           | 0.0453     | 2.8381          | 0.0216                 | 2.8290          | 9                  |
|                           | Genes with promoter regions [-2kb,2kb] around transcription start site containing motif NNNRRCCAATSR. Motif does not match any known transcription factor                                                                         | 0.0010           | 0.0452     | 2.0707          | 0.0184                 | 1.9565          | 20                 |

**Supplementary Table 29:** GREAT enrichments of all p300 binding peaks in mouse embryonic stem cells using the *single nearest gene* association rule with a maximum extension of 1 Mb. Shown are the top ten binomial enriched terms at a false discovery rate of 0.05 with a fold enrichment of at least two that are also significant by the hypergeometric test.

| Ontology                 | Term                                                                                                                                                                                                                   | Binomial Results |            |                 | Hypergeometric Results |                 |                    |
|--------------------------|------------------------------------------------------------------------------------------------------------------------------------------------------------------------------------------------------------------------|------------------|------------|-----------------|------------------------|-----------------|--------------------|
|                          | Name                                                                                                                                                                                                                   | Raw P-Value      | FDR Q-Val  | Fold Enrichment | FDR Q-Val              | Fold Enrichment | Observed Gene Hits |
| GO Molecular Function    | chromatin binding                                                                                                                                                                                                      | 7.9333e-7        | 0.0005     | 3.9031          | 0.0051                 | 4.0972          | 13                 |
| GO Biological Process    | stem cell differentiation                                                                                                                                                                                              | 7.8285e-14       | 3.5533e-10 | 16.2918         | 2.6561e-5              | 12.0814         | 8                  |
|                          | stem cell maintenance                                                                                                                                                                                                  | 2.3293e-13       | 5.2863e-10 | 17.3315         | 6.0582e-5              | 13.3532         | 7                  |
|                          | anatomical structure homeostasis                                                                                                                                                                                       | 6.2044e-8        | 1.4822e-5  | 4.8903          | 0.0050                 | 4.0682          | 11                 |
|                          | negative regulation of transcription, DNA-dependent                                                                                                                                                                    | 7.3758e-8        | 1.6739e-5  | 3.0515          | 3.1432e-6              | 3.7754          | 25                 |
|                          | negative regulation of RNA metabolic process                                                                                                                                                                           | 7.7077e-8        | 1.6660e-5  | 3.0453          | 3.5304e-6              | 3.7442          | 25                 |
|                          | regulation of transcription from RNA polymerase II promoter                                                                                                                                                            | 5.8763e-7        | 9.5258e-5  | 2.1364          | 1.4552e-7              | 2.9501          | 42                 |
|                          | negative regulation of cellular biosynthetic process                                                                                                                                                                   | 1.2693e-6        | 0.0002     | 2.5687          | 5.7895e-5              | 3.0018          | 27                 |
|                          | negative regulation of biosynthetic process                                                                                                                                                                            | 1.3101e-6        | 0.0002     | 2.5649          | 5.8430e-5              | 2.9745          | 27                 |
|                          | negative regulation of cellular metabolic process                                                                                                                                                                      | 1.4930e-6        | 0.0002     | 2.3929          | 5.7751e-5              | 2.7539          | 31                 |
|                          | negative regulation of macromolecule biosynthetic process                                                                                                                                                              | 1.5441e-6        | 0.0002     | 2.5906          | 0.0001                 | 2.9541          | 26                 |
| GO Cellular Component    | nucleoplasm part                                                                                                                                                                                                       | 2.0530e-5        | 0.0016     | 2.3924          | 0.0134                 | 2.3818          | 23                 |
|                          | nucleoplasm                                                                                                                                                                                                            | 6.7684e-5        | 0.0046     | 2.2348          | 0.0364                 | 2.1596          | 23                 |
| MGI Expression: Detected | TTS4_inner cell mass                                                                                                                                                                                                   | 2.0937e-17       | 1.4030e-13 | 2.9581          | 9.5169e-9              | 2.5859          | 62                 |
|                          | Theiler_stage_4                                                                                                                                                                                                        | 2.2247e-17       | 7.4539e-14 | 2.8057          | 3.1541e-8              | 2.3925          | 67                 |
|                          | TTS4_embryo                                                                                                                                                                                                            | 3.9337e-17       | 8.7865e-14 | 2.8008          | 3.6959e-8              | 2.3779          | 66                 |
|                          | TTS4_extraembryonic component                                                                                                                                                                                          | 7.3534e-17       | 1.2319e-13 | 2.8164          | 5.0816e-8              | 2.3938          | 64                 |
|                          | Theiler_stage_5                                                                                                                                                                                                        | 7.9283e-17       | 1.0626e-13 | 2.7444          | 4.1493e-8              | 2.3873          | 66                 |
|                          | TTS5_inner cell mass                                                                                                                                                                                                   | 5.6549e-16       | 6.3156e-13 | 3.1322          | 4.5785e-8              | 2.7304          | 51                 |
|                          | TTS5_embryo                                                                                                                                                                                                            | 1.0499e-15       | 1.0050e-12 | 3.0575          | 5.6397e-8              | 2.6696          | 52                 |
|                          | TTS3_zona pellucida                                                                                                                                                                                                    | 5.2571e-15       | 4.4035e-12 | 2.8663          | 2.5469e-6              | 2.2978          | 53                 |
|                          | Theiler_stage_2                                                                                                                                                                                                        | 1.0294e-14       | 7.6647e-12 | 2.7486          | 1.5723e-6              | 2.2934          | 56                 |
|                          | TTS3_second polar body                                                                                                                                                                                                 | 1.1695e-14       | 7.8371e-12 | 2.8190          | 3.1502e-6              | 2.2814          | 53                 |
| MSigDB Perturbation      | Downregulated in MES cells from elongin-A knockout mice                                                                                                                                                                | 1.6281e-13       | 4.0378e-11 | 5.6821          | 7.1557e-7              | 4.7870          | 21                 |
|                          | Down-regulated by stable RNAi knock-down of PRMT5 in NIH 3T3 cells                                                                                                                                                     | 2.4935e-6        | 0.0002     | 9.6774          | 0.0059                 | 7.4988          | 6                  |
|                          | Genes upregulated in Egr2Lo/Lo mice (who bear mutations in the transcription factor Egr2 and in which peripheral nerve myelination is disrupted) whose expression is significantly altered after sciatic nerve injury. | 0.0001           | 0.0045     | 3.2558          | 0.0066                 | 3.9474          | 11                 |
|                          | Up-regulated by PDGF in mouse embryonic stem cells, via microarray-coupled gene-trap mutagenesis                                                                                                                       | 0.0009           | 0.0235     | 5.5731          | 0.0319                 | 8.0543          | 4                  |
|                          | Genes up-regulated in anergic mouse T helper cells (A.E7), versus non-anergic stimulated controls                                                                                                                      | 0.0010           | 0.0245     | 3.3630          | 0.0056                 | 4.5305          | 10                 |
| InterPro                 | Homeodomain-related                                                                                                                                                                                                    | 5.8593e-6        | 0.0368     | 2.5135          | 0.0029                 | 3.0596          | 26                 |

**Supplementary Table 30:** Enrichments for regions bound by Stat3 in mouse embryonic stem cells. (a) DAVID gene-based enrichments of genes with proximal Stat3 binding events. (b) GREAT *cis*-regulatory element enrichments for all regions bound by Stat3.

**a**

**DAVID Gene-based Enrichments of Stat3 Binding Peaks in Mouse Embryonic Stem Cells**

| Annotation Cluster 1                     | Enrichment Score: 11.94                                               | Count | P Value | Benjamini       |
|------------------------------------------|-----------------------------------------------------------------------|-------|---------|-----------------|
| <input type="checkbox"/> GOTERM_CC_ALL   | intracellular                                                         | RT    | 320     | 1.6E-20 1.2E-17 |
| <input type="checkbox"/> GOTERM_CC_ALL   | intracellular part                                                    | RT    | 307     | 6.2E-20 2.4E-17 |
| <input type="checkbox"/> GOTERM_CC_ALL   | intracellular membrane-bound organelle                                | RT    | 245     | 2.3E-16 5.8E-14 |
| <input type="checkbox"/> GOTERM_CC_ALL   | membrane-bound organelle                                              | RT    | 245     | 2.5E-16 4.4E-14 |
| <input type="checkbox"/> GOTERM_CC_ALL   | intracellular organelle                                               | RT    | 263     | 4.4E-15 7.0E-13 |
| <input type="checkbox"/> GOTERM_CC_ALL   | organelle                                                             | RT    | 263     | 5.1E-15 6.7E-13 |
| <input type="checkbox"/> GOTERM_CC_ALL   | nucleus                                                               | RT    | 175     | 1.0E-14 1.2E-12 |
| <input type="checkbox"/> SP_PIR_KEYWORDS | nucleus                                                               | RT    | 137     | 5.5E-9 2.4E-6   |
| <input type="checkbox"/> GOTERM_CC_ALL   | cytoplasm                                                             | RT    | 185     | 2.9E-6 2.9E-4   |
| <input type="checkbox"/> GOTERM_CC_ALL   | cell part                                                             | RT    | 379     | 4.7E-3 1.7E-1   |
| Annotation Cluster 2                     | Enrichment Score: 5.72                                                | Count | P Value | Benjamini       |
| <input type="checkbox"/> GOTERM_CC_ALL   | nucleus                                                               | RT    | 175     | 1.0E-14 1.2E-12 |
| <input type="checkbox"/> GOTERM_BP_ALL   | cellular metabolic process                                            | RT    | 245     | 1.6E-11 8.2E-8  |
| <input type="checkbox"/> GOTERM_BP_ALL   | primary metabolic process                                             | RT    | 242     | 1.3E-10 3.4E-7  |
| <input type="checkbox"/> GOTERM_BP_ALL   | metabolic process                                                     | RT    | 259     | 1.0E-9 1.8E-6   |
| <input type="checkbox"/> SP_PIR_KEYWORDS | nucleus                                                               | RT    | 137     | 5.5E-9 2.4E-6   |
| <input type="checkbox"/> GOTERM_BP_ALL   | biopolymer metabolic process                                          | RT    | 170     | 2.8E-8 3.7E-5   |
| <input type="checkbox"/> GOTERM_BP_ALL   | regulation of cellular process                                        | RT    | 142     | 1.1E-7 9.2E-5   |
| <input type="checkbox"/> GOTERM_BP_ALL   | macromolecule metabolic process                                       | RT    | 208     | 1.5E-7 1.1E-4   |
| <input type="checkbox"/> GOTERM_BP_ALL   | biological regulation                                                 | RT    | 163     | 1.8E-7 1.2E-4   |
| <input type="checkbox"/> GOTERM_BP_ALL   | nucleobase, nucleoside, nucleotide and nucleic acid metabolic process | RT    | 131     | 3.7E-7 2.1E-4   |
| Annotation Cluster 3                     | Enrichment Score: 3.28                                                | Count | P Value | Benjamini       |
| <input type="checkbox"/> GOTERM_BP_ALL   | organelle organization and biogenesis                                 | RT    | 53      | 1.6E-4 3.5E-2   |
| <input type="checkbox"/> GOTERM_BP_ALL   | establishment and/or maintenance of chromatin architecture            | RT    | 19      | 1.9E-4 3.9E-2   |
| <input type="checkbox"/> GOTERM_BP_ALL   | DNA packaging                                                         | RT    | 19      | 2.6E-4 4.5E-2   |
| Annotation Cluster 4                     | Enrichment Score: 3.17                                                | Count | P Value | Benjamini       |
| <input type="checkbox"/> GOTERM_BP_ALL   | post-translational protein modification                               | RT    | 63      | 1.3E-5 3.7E-3   |
| <input type="checkbox"/> GOTERM_BP_ALL   | cellular protein metabolic process                                    | RT    | 108     | 2.2E-4 4.2E-2   |
| <input type="checkbox"/> GOTERM_BP_ALL   | protein modification process                                          | RT    | 65      | 2.3E-4 4.3E-2   |
| <input type="checkbox"/> GOTERM_BP_ALL   | cellular macromolecule metabolic process                              | RT    | 109     | 2.3E-4 4.2E-2   |
| <input type="checkbox"/> GOTERM_BP_ALL   | biopolymer modification                                               | RT    | 67      | 2.4E-4 4.2E-2   |
| Annotation Cluster 5                     | Enrichment Score: 2.91                                                | Count | P Value | Benjamini       |
| <input type="checkbox"/> GOTERM_BP_ALL   | positive regulation of cellular process                               | RT    | 43      | 6.6E-5 1.6E-2   |
| <input type="checkbox"/> GOTERM_BP_ALL   | positive regulation of biological process                             | RT    | 47      | 8.1E-5 1.9E-2   |

**b**

**GREAT Enrichments of Stat3 Binding Peaks in Mouse Embryonic Stem Cells**

| Ontology                 | Term                                                                                                                                    | Binomial Results |            |                 | Hypergeometric Results |                 |                    |
|--------------------------|-----------------------------------------------------------------------------------------------------------------------------------------|------------------|------------|-----------------|------------------------|-----------------|--------------------|
|                          |                                                                                                                                         | Raw P-Value      | FDR Q-Val  | Fold Enrichment | FDR Q-Val              | Fold Enrichment | Observed Gene Hits |
| GO Biological Process    | stem cell maintenance                                                                                                                   | 8.7375e-9        | 9.4420e-6  | 3.4913          | 0.0001                 | 3.7396          | 13                 |
|                          | stem cell differentiation                                                                                                               | 1.0488e-6        | 7.8038e-5  | 3.0521          | 0.0036                 | 2.9605          | 13                 |
|                          | response to retinoic acid                                                                                                               | 9.3973e-6        | 0.0005     | 3.1890          | 0.0151                 | 3.0364          | 10                 |
|                          | response to nutrient                                                                                                                    | 1.0822e-5        | 0.0005     | 3.1561          | 0.0395                 | 2.7328          | 10                 |
|                          | trophoblast cell differentiation                                                                                                        | 2.7967e-5        | 0.0012     | 3.1670          | 0.0088                 | 3.2150          | 10                 |
|                          | ER-nuclear signaling pathway                                                                                                            | 0.0008           | 0.0162     | 3.0507          | 0.0395                 | 2.7328          | 10                 |
| Mouse Phenotype          | embryonic lethality before somite formation                                                                                             | 1.6975e-12       | 5.2389e-10 | 2.0213          | 2.3511e-6              | 1.8142          | 79                 |
|                          | abnormal placenta development                                                                                                           | 2.1831e-11       | 5.7535e-9  | 2.1411          | 0.0004                 | 1.8218          | 50                 |
|                          | abnormal placenta labyrinth morphology                                                                                                  | 2.7099e-8        | 3.2734e-6  | 2.0236          | 0.0020                 | 1.8375          | 39                 |
|                          | abnormal trophoblast layer morphology                                                                                                   | 8.1689e-9        | 9.1094e-6  | 2.2123          | 0.0037                 | 1.9010          | 32                 |
|                          | abnormal energy balance                                                                                                                 | 2.4084e-7        | 2.3667e-5  | 2.1543          | 0.0103                 | 1.7847          | 32                 |
|                          | abnormal embryonic hematopoiesis                                                                                                        | 2.4978e-7        | 2.4137e-5  | 2.6279          | 0.0245                 | 2.1329          | 16                 |
|                          | abnormal wound healing                                                                                                                  | 7.8197e-7        | 6.7670e-5  | 2.9022          | 0.0248                 | 1.9129          | 21                 |
|                          | abnormal pro-B cell morphology                                                                                                          | 8.2604e-6        | 0.0005     | 2.0095          | 0.0117                 | 1.8947          | 26                 |
|                          | echinocytosis                                                                                                                           | 3.1287e-5        | 0.0015     | 6.1677          | 0.0192                 | 4.5546          | 5                  |
|                          | abnormal neuronal precursor proliferation                                                                                               | 6.2130e-5        | 0.0024     | 2.3991          | 0.0445                 | 2.5689          | 9                  |
| PANTHER pathway          | interferon-gamma signaling pathway                                                                                                      | 9.5342e-10       | 1.4355e-7  | 4.3894          | 0.0498                 | 2.6234          | 12                 |
| MSigDB Pathway           | Genes preferentially expressed in breast cancers, especially those involved in estrogen-receptor-dependent signal transduction.         | 4.0499e-9        | 9.2335e-7  | 2.2355          | 2.7280e-5              | 2.3013          | 40                 |
| MGI Expression: Detected | TS5_trophoblast                                                                                                                         | 1.7029e-11       | 3.5661e-9  | 2.9054          | 0.0002                 | 1.9737          | 39                 |
|                          | TS5_extraembryonic component                                                                                                            | 3.9589e-10       | 6.6321e-8  | 2.2903          | 0.0004                 | 1.8831          | 41                 |
|                          | TS12_future midbrain                                                                                                                    | 1.0814e-6        | 0.0001     | 2.1152          | 2.3384e-5              | 2.6770          | 24                 |
|                          | TS15_primordial germ cells                                                                                                              | 3.4369e-5        | 0.0022     | 4.3170          | 0.0211                 | 3.6437          | 6                  |
|                          | TS25_ovary                                                                                                                              | 5.4173e-5        | 0.0032     | 4.1136          | 0.0018                 | 3.4159          | 10                 |
|                          | TS25_reproductive system;female                                                                                                         | 6.1079e-5        | 0.0035     | 4.0611          | 0.0034                 | 3.2150          | 10                 |
|                          | TS9_epiblast                                                                                                                            | 0.0001           | 0.0071     | 2.5415          | 2.2095e-5              | 3.5645          | 15                 |
|                          | TS21_ovary;primordial germ cells                                                                                                        | 0.0001           | 0.0072     | 2.3928          | 0.0036                 | 3.0743          | 9                  |
|                          | TS21_testis;primordial germ cells                                                                                                       | 0.0002           | 0.0059     | 2.8111          | 0.0036                 | 2.4643          | 10                 |
|                          | TS23_optic nerve                                                                                                                        | 0.0004           | 0.0166     | 3.1263          | 0.0128                 | 4.5546          | 5                  |
| MSigDB Perturbation      | Downregulated in MES cells from elonin-A knockout mice                                                                                  | 1.1427e-26       | 2.8339e-24 | 3.0013          | 9.2930e-9              | 2.2000          | 64                 |
|                          | Up-regulated by insulin in murine adipocytes, but response is blunted following induction of insulin-resistance with TNFalpha treatment | 8.9619e-17       | 7.4085e-15 | 11.9927         | 0.0498                 | 2.9812          | 6                  |
|                          | Genes that increased after LIF treatment (10 ng/ml, overnight) in A1730 cells                                                           | 1.2695e-14       | 6.2840e-13 | 4.3311          | 0.0002                 | 2.6692          | 21                 |
|                          | Downregulated by expression of constitutively active JNK in 3T3 cells                                                                   | 3.3296e-10       | 1.3752e-8  | 3.5661          | 0.0216                 | 2.2920          | 13                 |
|                          | Genes identified as time indicators in mouse liver                                                                                      | 6.7485e-10       | 2.3903e-8  | 2.0544          | 0.0018                 | 1.6869          | 50                 |
|                          | Up-regulated by PDGF in mouse embryonic stem cells, via microarray-coupled gene-trap mutagenesis                                        | 1.7617e-8        | 5.4613e-7  | 3.3094          | 4.2516e-5              | 3.9473          | 13                 |
|                          | Downregulated following iNOS induction in hepatocytes (Tables 3-17)                                                                     | 5.9465e-7        | 1.3407e-5  | 2.3412          | 0.0058                 | 1.9129          | 26                 |
|                          | Up-regulated by nickel(II) in sensitive A9 mouse lung tissue                                                                            | 9.6776e-5        | 0.0014     | 2.2867          | 0.0064                 | 2.3228          | 17                 |
|                          | Up-regulated by insulin in murine adipocytes, and continue to respond following induction of insulin-resistance with TNFalpha treatment | 0.0001           | 0.0013     | 2.8576          | 0.0385                 | 2.4595          | 9                  |
|                          | Transcription modulators presented during myeloid differentiation                                                                       | 0.0013           | 0.0110     | 2.0850          | 0.0388                 | 2.0898          | 13                 |

**Supplementary Table 31:** “Gene-based GREAT” enrichments of all genes that possess a Stat3 binding peak in mouse embryonic stem cells within 2 kb of its transcription start site. Shown are the top ten hypergeometric enriched terms at a false discovery rate of 0.05.

| Ontology              | Term                                                                                               | Hypergeometric Results |           |                    |
|-----------------------|----------------------------------------------------------------------------------------------------|------------------------|-----------|--------------------|
|                       | Name                                                                                               | Raw P-Value            | FDR Q-Val | Observed Gene Hits |
| GO Molecular Function | binding                                                                                            | 3.6186e-7              | 0.0009    | 311                |
|                       | nucleic acid binding                                                                               | 1.1622e-6              | 0.0014    | 97                 |
| GO Biological Process | cellular metabolic process                                                                         | 1.5460e-11             | 7.0172e-8 | 215                |
|                       | metabolic process                                                                                  | 1.0073e-9              | 2.2861e-6 | 224                |
|                       | primary metabolic process                                                                          | 2.9303e-9              | 4.4336e-6 | 202                |
|                       | cellular macromolecule metabolic process                                                           | 7.4631e-8              | 8.4688e-5 | 188                |
|                       | macromolecule metabolic process                                                                    | 2.0175e-7              | 0.0002    | 188                |
|                       | cellular biopolymer metabolic process                                                              | 2.9796e-7              | 0.0002    | 183                |
|                       | biopolymer metabolic process                                                                       | 5.5103e-7              | 0.0004    | 183                |
|                       | positive regulation of cellular process                                                            | 2.5304e-6              | 0.0014    | 51                 |
|                       | DNA damage response, signal transduction by p53 class mediator resulting in induction of apoptosis | 4.5115e-6              | 0.0023    | 5                  |
|                       | cellular catabolic process                                                                         | 5.4379e-6              | 0.0025    | 43                 |
| GO Cellular Component | intracellular membrane-bounded organelle                                                           | 1.1571e-9              | 7.9379e-7 | 227                |
|                       | membrane-bounded organelle                                                                         | 1.2539e-9              | 4.4379e-7 | 227                |
|                       | nucleus                                                                                            | 2.3517e-9              | 5.3776e-7 | 158                |
|                       | intracellular organelle                                                                            | 4.5971e-9              | 7.8669e-7 | 247                |
|                       | organelle                                                                                          | 4.9410e-9              | 6.7802e-7 | 247                |
|                       | intracellular part                                                                                 | 1.3180e-8              | 1.5069e-6 | 251                |
|                       | intracellular                                                                                      | 1.7520e-8              | 1.7569e-6 | 257                |
|                       | nuclear part                                                                                       | 7.8666e-7              | 6.7626e-5 | 45                 |
|                       | nuclear lumen                                                                                      | 1.9187e-5              | 0.0015    | 29                 |
|                       | intracellular organelle lumen                                                                      | 3.5717e-5              | 0.0025    | 31                 |
| Mouse Phenotype       | prenatal lethality                                                                                 | 1.1941e-7              | 0.0007    | 71                 |
|                       | lethality-prenatal/perinatal                                                                       | 2.1215e-6              | 0.0062    | 84                 |
|                       | embryonic lethality                                                                                | 2.7530e-6              | 0.0063    | 53                 |
|                       | abnormal cell physiology                                                                           | 3.6327e-6              | 0.0063    | 49                 |
|                       | abnormal placenta labyrinth morphology                                                             | 9.1559e-6              | 0.0106    | 13                 |
|                       | abnormal dendritic cell number                                                                     | 1.1970e-5              | 0.0116    | 8                  |
|                       | cellular phenotype                                                                                 | 1.2178e-5              | 0.0101    | 51                 |
|                       | abnormal extraembryonic tissue morphology                                                          | 1.6220e-5              | 0.0110    | 31                 |
|                       | abnormal placenta morphology                                                                       | 2.2914e-5              | 0.0148    | 21                 |
|                       | abnormal homeostasis                                                                               | 3.7634e-5              | 0.0219    | 75                 |

  

| Ontology                | Term                                                                                                                                                                                                                             | Hypergeometric Results |           |                    |
|-------------------------|----------------------------------------------------------------------------------------------------------------------------------------------------------------------------------------------------------------------------------|------------------------|-----------|--------------------|
|                         | Name                                                                                                                                                                                                                             | Raw P-Value            | FDR Q-Val | Observed Gene Hits |
| MGI Expression Detected | TS28_midbrain                                                                                                                                                                                                                    | 1.7371e-6              | 0.0116    | 49                 |
|                         | TS28_corpus striatum                                                                                                                                                                                                             | 1.8633e-6              | 0.0062    | 48                 |
|                         | TS28_hand                                                                                                                                                                                                                        | 2.0215e-6              | 0.0045    | 27                 |
|                         | TS28_forelimb                                                                                                                                                                                                                    | 2.3468e-6              | 0.0039    | 27                 |
|                         | TS5_inner cell mass                                                                                                                                                                                                              | 2.4488e-6              | 0.0033    | 39                 |
|                         | TS5_embryo                                                                                                                                                                                                                       | 2.7203e-6              | 0.0030    | 40                 |
|                         | Thailer_stage_5                                                                                                                                                                                                                  | 5.7046e-6              | 0.0055    | 50                 |
|                         | TS28_hippocampus                                                                                                                                                                                                                 | 5.8132e-6              | 0.0049    | 58                 |
|                         | TS4_inner cell mass                                                                                                                                                                                                              | 6.8008e-6              | 0.0051    | 45                 |
|                         | TS28_uterine cervix                                                                                                                                                                                                              | 7.2730e-6              | 0.0049    | 29                 |
| MSigDB Perturbation     | Enriched in mouse embryonic stem cells, compared to differentiated brain and bone marrow cells                                                                                                                                   | 1.3825e-7              | 3.4286e-5 | 62                 |
|                         | Downregulated in MES cells from elongin-A knockout mice                                                                                                                                                                          | 1.5875e-5              | 0.0020    | 15                 |
|                         | Enriched in mouse hematopoietic stem cells, compared to differentiated brain and bone marrow cells                                                                                                                               | 2.8197e-5              | 0.0023    | 57                 |
|                         | Genes that increased after LIF treatment (10 ng/ml, overnight) in AIT20 cells                                                                                                                                                    | 0.0001                 | 0.0064    | 7                  |
|                         | Up-regulated by insulin in murine adipocytes, but response is blunted following induction of insulin-resistance with TNF alpha treatment                                                                                         | 0.0001                 | 0.0062    | 4                  |
|                         | Up-regulated in the cerebral cortex of aged (22 months) BALB/c mice, compared to young (2 months) controls                                                                                                                       | 0.0001                 | 0.0060    | 6                  |
|                         | Genes upregulated in Egr2Lo mice (who bear mutations in the transcription factor Egr2 and in which peripheral nerve myelination is disrupted) whose expression is significantly altered after sciatic nerve injury.              | 0.0003                 | 0.0098    | 10                 |
|                         | Down-regulated at 48-96 hours during differentiation of 3T3-L1 fibroblasts into adipocytes with IDX (insulin, dexamethasone and isobutylxanthine), vs. fibroblasts treated with IDX + TSA to prevent differentiation (cluster 1) | 0.0004                 | 0.0138    | 6                  |
|                         | Enriched in mouse neural stem cells, compared to differentiated brain and bone marrow cells                                                                                                                                      | 0.0005                 | 0.0137    | 65                 |
|                         | Genes identified as time indicators in mouse liver.                                                                                                                                                                              | 0.0010                 | 0.0253    | 12                 |

**Supplementary Table 32:** GREAT enrichments of all Stat3 binding peaks in mouse embryonic stem cells using the *basal plus extension* association rule with a basal regulatory region extending 5 kb upstream and 1 kb downstream of the transcription start site and a maximum extension of 50 kb. Shown are the top ten binomial enriched terms at a false discovery rate of 0.05 with a fold enrichment of at least two that are also significant by the hypergeometric test.

| Ontology                 | Term                                                                                                                                                                     | Binomial Results |             |                 | Hypergeometric Results |                 |                    |
|--------------------------|--------------------------------------------------------------------------------------------------------------------------------------------------------------------------|------------------|-------------|-----------------|------------------------|-----------------|--------------------|
|                          | Name                                                                                                                                                                     | Raw P-Value      | FDR Q-Val   | Fold Enrichment | FDR Q-Val              | Fold Enrichment | Observed Gene Hits |
| GO Biological Process    | binding                                                                                                                                                                  | 2.5949e-173      | 6.1758e-170 | 2.0476          | 6.1338e-13             | 1.1504          | 1246               |
|                          | protein binding                                                                                                                                                          | 9.7876e-95       | 1.1647e-91  | 2.1671          | 1.7561e-6              | 1.2023          | 650                |
|                          | nucleic acid binding                                                                                                                                                     | 7.2358e-83       | 5.7404e-80  | 2.7991          | 1.8306e-10             | 1.4239          | 359                |
|                          | catalytic activity                                                                                                                                                       | 2.2357e-71       | 1.3303e-68  | 2.0824          | 0.0018                 | 1.1549          | 579                |
|                          | DNA binding                                                                                                                                                              | 3.0532e-67       | 1.4533e-64  | 2.9482          | 1.8398e-8              | 1.4716          | 260                |
|                          | transcription regulator activity                                                                                                                                         | 1.5822e-46       | 6.2760e-44  | 3.0174          | 2.5617e-8              | 1.6195          | 174                |
|                          | nucleotide binding                                                                                                                                                       | 1.9174e-44       | 6.5191e-42  | 2.4296          | 1.1206e-5              | 1.3656          | 265                |
|                          | transferase activity                                                                                                                                                     | 2.3052e-40       | 6.8581e-38  | 2.4533          | 0.0003                 | 1.3409          | 230                |
|                          | transition metal ion binding                                                                                                                                             | 2.5393e-38       | 5.0363e-36  | 2.1414          | 0.0287                 | 1.1988          | 298                |
|                          | zinc ion binding                                                                                                                                                         | 2.5524e-37       | 4.6726e-35  | 2.2866          | 0.0021                 | 1.2736          | 254                |
| GO Biological Process    | cellular process                                                                                                                                                         | 1.3765e-166      | 6.2482e-163 | 2.0431          | 0.0006                 | 1.0769          | 1218               |
|                          | metabolic process                                                                                                                                                        | 3.5271e-128      | 8.0048e-125 | 2.2512          | 4.8966e-10             | 1.2103          | 817                |
|                          | cellular metabolic process                                                                                                                                               | 1.6127e-124      | 2.4400e-121 | 2.3078          | 4.2053e-10             | 1.2297          | 755                |
|                          | primary metabolic process                                                                                                                                                | 8.4370e-119      | 9.5739e-116 | 2.2960          | 1.7510e-9              | 1.2239          | 730                |
|                          | macromolecule metabolic process                                                                                                                                          | 2.6026e-107      | 2.3626e-104 | 2.3762          | 1.7879e-8              | 1.2397          | 615                |
|                          | cellular macromolecule metabolic process                                                                                                                                 | 5.0435e-107      | 3.8154e-104 | 2.3855          | 1.1814e-8              | 1.2448          | 609                |
|                          | biopolymer metabolic process                                                                                                                                             | 7.7545e-105      | 5.0283e-102 | 2.3763          | 9.3911e-8              | 1.2322          | 597                |
|                          | cellular biopolymer metabolic process                                                                                                                                    | 1.3745e-104      | 7.7983e-102 | 2.3819          | 8.1644e-8              | 1.2351          | 593                |
|                          | regulation of macromolecule metabolic process                                                                                                                            | 5.4955e-84       | 2.2676e-81  | 2.7586          | 1.0188e-10             | 1.4401          | 362                |
|                          | biosynthetic process                                                                                                                                                     | 1.0399e-82       | 3.6307e-80  | 2.6258          | 1.6191e-9              | 1.3666          | 400                |
| GO Cellular Component    | intracellular part                                                                                                                                                       | 9.8828e-179      | 6.7796e-176 | 2.2256          | 2.6149e-17             | 1.1999          | 1112               |
|                          | intracellular                                                                                                                                                            | 2.6843e-178      | 9.2071e-176 | 2.1978          | 1.7433e-17             | 1.1963          | 1142               |
|                          | intracellular organelle                                                                                                                                                  | 1.1842e-149      | 2.0310e-147 | 2.2552          | 5.7583e-12             | 1.1972          | 931                |
|                          | organelle                                                                                                                                                                | 2.2422e-149      | 3.0763e-147 | 2.2530          | 5.3039e-12             | 1.1964          | 931                |
|                          | membrane-bounded organelle                                                                                                                                               | 3.3219e-136      | 3.7980e-134 | 2.2907          | 1.8192e-10             | 1.2025          | 828                |
|                          | intracellular membrane-bounded organelle                                                                                                                                 | 5.4510e-136      | 5.3420e-134 | 2.2905          | 1.6864e-10             | 1.2024          | 827                |
|                          | nucleus                                                                                                                                                                  | 5.0998e-110      | 4.3731e-108 | 2.5308          | 2.3283e-11             | 1.2998          | 560                |
|                          | cytoplasm                                                                                                                                                                | 4.7498e-104      | 3.6204e-102 | 2.1907          | 2.4124e-7              | 1.1875          | 718                |
|                          | intracellular organelle part                                                                                                                                             | 7.2907e-54       | 5.0014e-52  | 2.5001          | 0.0003                 | 1.2632          | 301                |
|                          | organelle part                                                                                                                                                           | 5.7597e-53       | 3.5920e-51  | 2.4767          | 0.0006                 | 1.2530          | 301                |
| Mouse Phenotype          | mammalian phenotype                                                                                                                                                      | 1.5076e-126      | 8.7410e-123 | 2.2739          | 3.5926e-14             | 1.2757          | 758                |
|                          | lethality-prenatal/perinatal                                                                                                                                             | 2.0111e-82       | 5.8303e-79  | 2.8578          | 1.2157e-14             | 1.5599          | 330                |
|                          | prenatal lethality                                                                                                                                                       | 3.9576e-78       | 7.6488e-75  | 3.1910          | 1.4756e-14             | 1.6753          | 262                |
|                          | growth/size phenotype                                                                                                                                                    | 2.4755e-69       | 3.5883e-66  | 2.5544          | 1.6161e-9              | 1.4175          | 337                |
|                          | embryonic lethality                                                                                                                                                      | 2.6401e-61       | 3.0615e-58  | 3.2927          | 2.8154e-11             | 1.7051          | 194                |
|                          | abnormal embryogenesis/ development                                                                                                                                      | 4.4065e-55       | 4.2581e-52  | 3.0984          | 6.0791e-11             | 1.6830          | 196                |
|                          | abnormal postnatal growth/weight/body size                                                                                                                               | 2.2374e-51       | 1.8532e-48  | 2.4768          | 1.8541e-6              | 1.3848          | 268                |
|                          | abnormal blood cell morphology/development                                                                                                                               | 8.4753e-49       | 6.1425e-46  | 2.8459          | 9.2167e-7              | 1.4869          | 203                |
|                          | abnormal hematopoietic system morphology/development                                                                                                                     | 6.9927e-48       | 4.5049e-45  | 2.6981          | 7.9659e-6              | 1.4154          | 218                |
|                          | decreased body size                                                                                                                                                      | 1.2252e-47       | 7.1037e-45  | 2.6249          | 3.5735e-6              | 1.4293          | 220                |
| MGI Expression: Detected | TS28_organ system                                                                                                                                                        | 3.7281e-133      | 2.4982e-129 | 2.3329          | 4.6085e-15             | 1.2841          | 763                |
|                          | Theiler_stage_28                                                                                                                                                         | 8.9991e-133      | 3.0152e-129 | 2.3189          | 1.0998e-14             | 1.2757          | 769                |
|                          | TS28_visceral organ                                                                                                                                                      | 8.9115e-103      | 1.9905e-99  | 2.4696          | 7.2024e-9              | 1.2794          | 521                |
|                          | TS28_central nervous system                                                                                                                                              | 3.6460e-98       | 6.1079e-95  | 2.4392          | 1.2372e-13             | 1.3558          | 538                |
|                          | TS28_nervous system                                                                                                                                                      | 5.4726e-98       | 7.3344e-95  | 2.4344          | 1.3785e-13             | 1.3539          | 539                |
|                          | TS28_brain                                                                                                                                                               | 2.6555e-93       | 2.9658e-90  | 2.4666          | 4.3629e-13             | 1.3673          | 500                |
|                          | TS28_reproductive system                                                                                                                                                 | 3.2029e-89       | 3.0661e-86  | 2.5440          | 1.2198e-9              | 1.3340          | 443                |
|                          | Theiler_stage_4                                                                                                                                                          | 3.7746e-74       | 3.1617e-71  | 3.7374          | 1.4092e-15             | 1.8633          | 203                |
|                          | TS4_embryo                                                                                                                                                               | 8.4167e-72       | 6.2667e-69  | 3.6969          | 2.6965e-15             | 1.8522          | 200                |
|                          | TS21_embryo                                                                                                                                                              | 2.0583e-71       | 1.3793e-68  | 2.5015          | 2.9468e-10             | 1.3945          | 373                |
| MSigDB Perturbation      | Enriched in mouse hematopoietic stem cells, compared to differentiated brain and bone marrow cells                                                                       | 6.1060e-61       | 1.5143e-58  | 3.1865          | 8.9217e-8              | 1.4965          | 204                |
|                          | Enriched in mouse embryonic stem cells, compared to differentiated brain and bone marrow cells                                                                           | 3.7324e-52       | 4.6281e-50  | 2.9748          | 2.4581e-9              | 1.5669          | 203                |
|                          | Downregulated in MES cells from elongin-A knockout mice                                                                                                                  | 4.7725e-38       | 3.9453e-36  | 6.6059          | 2.3489e-10             | 2.9298          | 50                 |
|                          | Enriched in mouse neural stem cells, compared to differentiated brain and bone marrow cells                                                                              | 2.7866e-31       | 1.7277e-29  | 2.2188          | 0.0022                 | 1.2656          | 227                |
|                          | Trans-regulated hematopoietic stem cell (HSC) transcripts detected in bone marrow tissue (high likelihood ratio statistic (LRS) value and genome-wide linkage P < 0.005) | 3.8027e-24       | 1.8862e-22  | 2.5423          | 0.0252                 | 1.2872          | 122                |
|                          | Genes that increased after LIF treatment (10 ng/ml, overnight) in AT20 cells                                                                                             | 4.4037e-21       | 1.8202e-19  | 10.2546         | 0.0002                 | 3.4667          | 16                 |
|                          | Genes identified as time indicators in mouse liver.                                                                                                                      | 1.6406e-17       | 5.8125e-16  | 4.2744          | 0.0001                 | 2.1854          | 38                 |
|                          | Up-regulated by insulin in murine adipocytes, but response is blunted following induction of insulin-resistance with TNFalpha treatment                                  | 1.2277e-16       | 3.8058e-15  | 22.2054         | 0.0388                 | 4.2348          | 5                  |
|                          | Genes with at least five fold change in expression between Pre-BI and Large Pre-BI cells                                                                                 | 2.1701e-16       | 5.9797e-15  | 3.7099          | 0.0034                 | 1.7594          | 44                 |
|                          | Up-regulated by PDGF in mouse embryonic stem cells, via microarray-coupled gene-trap mutagenesis                                                                         | 1.9551e-15       | 4.8487e-14  | 12.0666         | 2.0394e-5              | 5.6935          | 11                 |

**Supplementary Table 33:** GREAT enrichments of all Stat3 binding peaks in mouse embryonic stem cells using the *two nearest genes* association rule with a maximum extension of 1 Mb. Shown are the top ten binomial enriched terms at a false discovery rate of 0.05 with a fold enrichment of at least two that are also significant by the hypergeometric test.

| Ontology                                                          | Term                                                                                                                                                                                                                             | Binomial Results                            |            |                 | Hypergeometric Results |                 |                    |    |
|-------------------------------------------------------------------|----------------------------------------------------------------------------------------------------------------------------------------------------------------------------------------------------------------------------------|---------------------------------------------|------------|-----------------|------------------------|-----------------|--------------------|----|
|                                                                   | Name                                                                                                                                                                                                                             | Raw P-Value                                 | FDR Q-Val  | Fold Enrichment | FDR Q-Val              | Fold Enrichment | Observed Gene Hits |    |
| GO Biological Process                                             | stem cell maintenance                                                                                                                                                                                                            | 7.9378e-9                                   | 6.4339e-7  | 3.7145          | 4.3980e-5              | 3.6718          | 14                 |    |
|                                                                   | stem cell differentiation                                                                                                                                                                                                        | 1.2632e-7                                   | 7.6450e-6  | 3.2424          | 0.0020                 | 2.9069          | 14                 |    |
|                                                                   | trophectodermal cell differentiation                                                                                                                                                                                             | 7.7369e-7                                   | 3.7761e-5  | 3.6356          | 0.0168                 | 2.9313          | 10                 |    |
|                                                                   | microtubule-based movement                                                                                                                                                                                                       | 1.1064e-6                                   | 5.1774e-5  | 2.2130          | 0.0185                 | 1.8064          | 29                 |    |
|                                                                   | cytoskeleton-dependent intracellular transport                                                                                                                                                                                   | 2.5472e-6                                   | 0.0001     | 2.0851          | 0.0385                 | 1.6786          | 32                 |    |
|                                                                   | response to retinoic acid                                                                                                                                                                                                        | 3.2378e-6                                   | 0.0001     | 3.3118          | 0.0065                 | 3.0453          | 11                 |    |
|                                                                   | response to nutrient                                                                                                                                                                                                             | 3.8858e-6                                   | 0.0002     | 3.2719          | 0.0190                 | 2.7408          | 11                 |    |
|                                                                   | N-acetylglucosamine metabolic process                                                                                                                                                                                            | 9.3244e-5                                   | 0.0023     | 3.6312          | 0.0463                 | 2.6227          | 10                 |    |
|                                                                   | amino sugar metabolic process                                                                                                                                                                                                    | 0.0007                                      | 0.0127     | 2.6868          | 0.0313                 | 2.4916          | 12                 |    |
|                                                                   | peptidyl-citrulline biosynthetic process from peptidyl-arginine                                                                                                                                                                  | 0.0024                                      | 0.0311     | 11.6080         | 0.0116                 | 4.9832          | 5                  |    |
|                                                                   | Mouse Phenotype                                                                                                                                                                                                                  | abnormal placenta morphology                | 1.2745e-18 | 4.1052e-16      | 2.0709                 | 2.0526e-5       | 1.6268             | 95 |
|                                                                   |                                                                                                                                                                                                                                  | embryonic lethality before somite formation | 1.3055e-13 | 2.6100e-11      | 2.0710                 | 5.9979e-6       | 1.7378             | 83 |
|                                                                   |                                                                                                                                                                                                                                  | abnormal placenta development               | 9.2992e-13 | 1.5858e-10      | 2.2172                 | 0.0005          | 1.7607             | 53 |
| increased resistance to diet-induced obesity                      |                                                                                                                                                                                                                                  | 8.0304e-11                                  | 1.0582e-8  | 3.2740          | 0.0096                 | 2.0302          | 22                 |    |
| increased energy expenditure                                      |                                                                                                                                                                                                                                  | 1.0444e-10                                  | 1.3457e-8  | 3.2451          | 0.0119                 | 1.9933          | 22                 |    |
| improved glucose tolerance                                        |                                                                                                                                                                                                                                  | 1.9379e-10                                  | 2.2931e-8  | 2.8319          | 0.0071                 | 1.9221          | 27                 |    |
| abnormal placenta labyrinth morphology                            |                                                                                                                                                                                                                                  | 1.1467e-9                                   | 1.1873e-7  | 2.1262          | 0.0055                 | 1.7183          | 40                 |    |
| abnormal energy balance                                           |                                                                                                                                                                                                                                  | 7.0476e-9                                   | 6.6987e-7  | 2.3042          | 0.0030                 | 1.8306          | 36                 |    |
| abnormal trophoblast layer morphology                             |                                                                                                                                                                                                                                  | 1.0955e-8                                   | 9.9246e-7  | 2.2937          | 0.0140                 | 1.7333          | 32                 |    |
| decreased circulating free fatty acid level                       |                                                                                                                                                                                                                                  | 1.4528e-8                                   | 1.2762e-6  | 3.2622          | 0.0473                 | 1.9447          | 16                 |    |
| MSigDB Pathway                                                    | Genes preferentially expressed in breast cancers, especially those involved in estrogen-receptor-dependent signal transduction.                                                                                                  | 1.4531e-9                                   | 3.3131e-7  | 2.2638          | 3.6361e-5              | 2.2031          | 42                 |    |
| MGI Expression: Detected                                          | TS5_inner cell mass                                                                                                                                                                                                              | 2.2945e-38                                  | 5.1252e-35 | 2.0383          | 1.2992e-13             | 1.6488          | 224                |    |
|                                                                   | TS4_compacted morula                                                                                                                                                                                                             | 2.6378e-37                                  | 4.4190e-34 | 2.0488          | 1.7481e-10             | 1.5391          | 223                |    |
|                                                                   | TS4_zona pellucida                                                                                                                                                                                                               | 3.4259e-37                                  | 4.5914e-34 | 2.0645          | 3.3937e-10             | 1.5399          | 216                |    |
|                                                                   | TS4_second polar body                                                                                                                                                                                                            | 3.4259e-37                                  | 4.5914e-34 | 2.0645          | 3.3937e-10             | 1.5399          | 216                |    |
|                                                                   | TS3_4-cell stage                                                                                                                                                                                                                 | 1.1807e-33                                  | 5.2748e-31 | 2.0602          | 2.4545e-10             | 1.5745          | 200                |    |
|                                                                   | TS5_trophectoderm                                                                                                                                                                                                                | 6.2396e-12                                  | 9.5027e-10 | 2.5246          | 0.0006                 | 1.8456          | 40                 |    |
|                                                                   | TS5_extraembryonic component                                                                                                                                                                                                     | 1.6344e-10                                  | 2.1062e-8  | 2.3077          | 0.0013                 | 1.7588          | 42                 |    |
|                                                                   | TS12_future midbrain                                                                                                                                                                                                             | 3.0219e-7                                   | 2.2753e-5  | 2.1738          | 9.3258e-6              | 2.6441          | 26                 |    |
|                                                                   | TS19_primordial germ cells                                                                                                                                                                                                       | 2.1114e-6                                   | 0.0001     | 7.1837          | 0.0484                 | 3.5594          | 5                  |    |
|                                                                   | TS25_ovary                                                                                                                                                                                                                       | 1.5408e-5                                   | 0.0007     | 4.3455          | 0.0040                 | 3.1145          | 10                 |    |
| MSigDB Perturbation                                               | Downregulated in MES cells from <i>elovin-A</i> knockout mice                                                                                                                                                                    | 1.5715e-30                                  | 1.9486e-28 | 3.1559          | 3.6518e-11             | 2.2879          | 73                 |    |
|                                                                   | Genes that increased after LIF treatment (10 ng/ml, overnight) in AtT20 cells                                                                                                                                                    | 6.1771e-15                                  | 3.0639e-13 | 4.3311          | 0.0007                 | 2.4337          | 21                 |    |
|                                                                   | Downregulated by expression of constitutively active JNK in 3T3 cells                                                                                                                                                            | 9.5081e-12                                  | 3.9300e-10 | 3.8068          | 0.0371                 | 2.0897          | 13                 |    |
|                                                                   | Genes identified as time indicators in mouse liver.                                                                                                                                                                              | 3.7588e-11                                  | 1.3317e-9  | 2.1388          | 0.0067                 | 1.5688          | 51                 |    |
|                                                                   | Up-regulated by PDGF in mouse embryonic stem cells, via microarray-coupled gene-trap mutagenesis                                                                                                                                 | 2.2140e-8                                   | 5.4908e-7  | 3.2753          | 0.0001                 | 3.5990          | 13                 |    |
|                                                                   | Downregulated following iNOS induction in hepatocytes (Tables 3-17)                                                                                                                                                              | 2.6681e-8                                   | 6.0153e-7  | 2.5063          | 0.0022                 | 1.9310          | 31                 |    |
|                                                                   | Down-regulated during the TGFbeta-induced epithelial-to-mesenchymal transition (EMT) of Ras-transformed mouse mammary epithelial (Eph4) cells (EMT is representative of late-stage tumor progression and metastasis)             | 1.6996e-5                                   | 0.0002     | 2.1744          | 0.0063                 | 2.0929          | 21                 |    |
|                                                                   | Upregulated by nickel(II) in sensitive A/J mouse lung tissue                                                                                                                                                                     | 5.4458e-5                                   | 0.0007     | 2.3299          | 0.0065                 | 2.2424          | 18                 |    |
|                                                                   | Down-regulated at 48-96 hours during differentiation of 3T3-L1 fibroblasts into adipocytes with IDX (insulin, dexamethasone and isobutylxanthine), vs. fibroblasts treated with IDX + TSA to prevent differentiation (cluster 1) | 0.0003                                      | 0.0025     | 2.4007          | 0.0465                 | 1.9166          | 15                 |    |
| Transcription modulators presented during myeloid differentiation | 0.0007                                                                                                                                                                                                                           | 0.0045                                      | 2.1452     | 0.0350          | 2.0519                 | 14              |                    |    |

**Supplementary Table 34:** GREAT enrichments of all Stat3 binding peaks in mouse embryonic stem cells using the *single nearest gene* association rule with a maximum extension of 1 Mb. Shown are the top ten binomial enriched terms at a false discovery rate of 0.05 with a fold enrichment of at least two that are also significant by the hypergeometric test.

| Ontology                 | Term                                                                                                                                                                                                                   | Binomial Results |            |                 | Hypergeometric Results |                 |                    |
|--------------------------|------------------------------------------------------------------------------------------------------------------------------------------------------------------------------------------------------------------------|------------------|------------|-----------------|------------------------|-----------------|--------------------|
|                          |                                                                                                                                                                                                                        | Raw P-Value      | FDR Q-Val  | Fold Enrichment | FDR Q-Val              | Fold Enrichment | Observed Gene Hits |
| GO Biological Process    | stem cell maintenance                                                                                                                                                                                                  | 2.3042e-10       | 3.3737e-8  | 5.6054          | 0.0007                 | 4.5612          | 10                 |
|                          | stem cell differentiation                                                                                                                                                                                              | 2.4462e-9        | 3.3646e-7  | 4.9178          | 0.0069                 | 3.6110          | 10                 |
|                          | response to retinoic acid                                                                                                                                                                                              | 2.6410e-9        | 3.5257e-7  | 5.7320          | 0.0028                 | 4.3332          | 9                  |
|                          | response to nutrient                                                                                                                                                                                                   | 3.1752e-9        | 4.1178e-7  | 5.6659          | 0.0071                 | 3.8999          | 9                  |
|                          | trophoblast cell differentiation                                                                                                                                                                                       | 1.1398e-7        | 1.2318e-5  | 5.0212          | 0.0002                 | 5.0978          | 10                 |
|                          | blastocyst formation                                                                                                                                                                                                   | 8.0351e-7        | 5.7891e-5  | 4.3506          | 0.0019                 | 4.1268          | 10                 |
|                          | T cell activation during immune response                                                                                                                                                                               | 1.5567e-6        | 0.0001     | 10.3712         | 0.0446                 | 4.8146          | 5                  |
|                          | lymphocyte activation during immune response                                                                                                                                                                           | 2.1885e-6        | 0.0001     | 8.2767          | 0.0327                 | 4.3332          | 6                  |
|                          | DNA damage response, signal transduction by p53 class mediator                                                                                                                                                         | 9.3056e-6        | 0.0005     | 6.8978          | 0.0493                 | 3.9998          | 6                  |
|                          | placenta development                                                                                                                                                                                                   | 0.0001           | 0.0034     | 2.7570          | 0.0067                 | 2.7659          | 15                 |
| Mouse Phenotype          | abnormal placenta morphology                                                                                                                                                                                           | 2.9517e-15       | 1.5558e-12 | 2.3511          | 3.6222e-7              | 2.0549          | 69                 |
|                          | embryonic lethality before somite formation                                                                                                                                                                            | 6.2400e-14       | 2.4120e-11 | 2.5172          | 2.5507e-8              | 2.2940          | 63                 |
|                          | abnormal placenta development                                                                                                                                                                                          | 2.1501e-12       | 6.2332e-10 | 2.7221          | 6.5187e-6              | 2.3688          | 41                 |
|                          | abnormal myeloid leukocyte morphology                                                                                                                                                                                  | 2.9815e-12       | 8.2318e-10 | 2.0653          | 0.0004                 | 1.6396          | 77                 |
|                          | abnormal phagocyte morphology                                                                                                                                                                                          | 4.4649e-12       | 1.0787e-9  | 2.1653          | 0.0004                 | 1.7074          | 66                 |
|                          | abnormal placenta labyrinth morphology                                                                                                                                                                                 | 7.9322e-11       | 1.5859e-8  | 2.7417          | 3.4253e-5              | 2.4654          | 33                 |
|                          | abnormal embryonic erythropoiesis                                                                                                                                                                                      | 3.1651e-9        | 5.2432e-7  | 4.8470          | 0.0090                 | 3.5453          | 9                  |
|                          | abnormal erythrocyte morphology                                                                                                                                                                                        | 1.1657e-8        | 1.8266e-6  | 2.2712          | 0.0019                 | 1.8383          | 42                 |
|                          | abnormal macrophage morphology                                                                                                                                                                                         | 1.3275e-8        | 2.0254e-6  | 2.2450          | 0.0005                 | 1.9259          | 44                 |
|                          | abnormal mononuclear phagocyte morphology                                                                                                                                                                              | 2.8303e-8        | 4.1026e-6  | 2.0441          | 0.0050                 | 1.6602          | 50                 |
| PANTHER Pathway          | Interferon-gamma signaling pathway                                                                                                                                                                                     | 7.0009e-9        | 1.0431e-6  | 5.3891          | 0.0033                 | 3.8132          | 11                 |
| MSigDB Pathway           | Genes preferentially expressed in breast cancers, especially those involved in estrogen-receptor-dependent signal transduction.                                                                                        | 4.5686e-7        | 0.0001     | 2.4552          | 0.0008                 | 2.5543          | 28                 |
| MGI Expression: Detected | Theiler_stage_4                                                                                                                                                                                                        | 1.8078e-36       | 1.2114e-32 | 2.1586          | 2.2710e-19             | 1.8955          | 222                |
|                          | T54_embryo                                                                                                                                                                                                             | 1.9877e-35       | 6.6598e-32 | 2.1460          | 1.5290e-18             | 1.8780          | 218                |
|                          | T55_inner cell mass                                                                                                                                                                                                    | 2.0051e-34       | 4.4787e-31 | 2.3833          | 4.5551e-18             | 2.0866          | 163                |
|                          | T54_zona pellucida                                                                                                                                                                                                     | 1.0520e-33       | 1.7623e-30 | 2.4327          | 3.8498e-13             | 1.8845          | 152                |
|                          | T54_second polar body                                                                                                                                                                                                  | 1.0520e-33       | 1.7623e-30 | 2.4327          | 3.8498e-13             | 1.8845          | 152                |
|                          | T54_compacted morula                                                                                                                                                                                                   | 1.0784e-33       | 1.2044e-30 | 2.4096          | 3.0386e-13             | 1.8725          | 156                |
|                          | T54_extraembryonic component                                                                                                                                                                                           | 2.5590e-33       | 2.4497e-30 | 2.1254          | 5.0500e-17             | 1.8513          | 207                |
|                          | T54_inner cell mass                                                                                                                                                                                                    | 2.5941e-33       | 2.1729e-30 | 2.1855          | 6.6822e-18             | 1.9347          | 194                |
|                          | T55_embryo                                                                                                                                                                                                             | 4.1652e-33       | 3.1012e-30 | 2.3199          | 1.8090e-17             | 2.0377          | 186                |
|                          | T53_4-cell stage                                                                                                                                                                                                       | 1.1865e-32       | 7.9510e-30 | 2.4810          | 2.4053e-14             | 1.9852          | 145                |
| MSigDB Perturbation      | Downregulated in MES cells from elongin-A knockout mice                                                                                                                                                                | 1.0742e-22       | 1.3320e-20 | 3.5084          | 2.4974e-10             | 2.8343          | 52                 |
|                          | Up-regulated by insulin in murine adipocytes, but response is blunted following induction of insulin-resistance with TNFalpha treatment                                                                                | 4.8992e-16       | 3.0375e-14 | 17.8189         | 0.0094                 | 4.7271          | 6                  |
|                          | Genes that increased after LIF treatment (10 ng/ml, overnight) in AtT20 cells                                                                                                                                          | 1.0313e-13       | 5.1153e-12 | 5.2830          | 8.2833e-5              | 3.4262          | 17                 |
|                          | Up-regulated by PDGF in mouse embryonic stem cells, via microarray-coupled gene-trap mutagenesis                                                                                                                       | 1.7918e-9        | 7.4060e-8  | 4.5881          | 2.5481e-6              | 5.7776          | 12                 |
|                          | Genes identified as time indicators in mouse liver.                                                                                                                                                                    | 2.1430e-9        | 7.5925e-8  | 2.4471          | 0.0002                 | 2.0863          | 39                 |
|                          | Down-regulated during the TGFbeta-induced epithelial-to-mesenchymal transition (EMT) of Ras-transformed mouse mammary epithelial (Eph4) cells (EMT is representative of late-stage tumor progression and metastasis)   | 2.2124e-7        | 5.4866e-6  | 3.1516          | 0.0006                 | 2.9466          | 17                 |
|                          | Downregulated following iNOS induction in hepatocytes (Tables 3-17)                                                                                                                                                    | 6.8287e-7        | 1.5396e-5  | 2.9065          | 0.0015                 | 2.3832          | 22                 |
|                          | Genes with at least five fold change in expression between Pre-BI and Large Pre-BII cells                                                                                                                              | 2.2090e-6        | 4.2141e-5  | 2.0613          | 0.0151                 | 1.5994          | 43                 |
|                          | Genes upregulated in Egr2Lo/Lo mice (who bear mutations in the transcription factor Egr2 and in which peripheral nerve myelination is disrupted) whose expression is significantly altered after sciatic nerve injury. | 6.3201e-6        | 0.0001     | 2.1060          | 8.9015e-5              | 2.4884          | 29                 |
|                          | Fifty genes most strongly up-regulated in liver tissue from mice deficient in the lamin-protease Zmpste24/Face1, versus wild-type controls                                                                             | 3.1745e-5        | 0.0005     | 4.0477          | 0.0395                 | 2.6896          | 9                  |

**Supplementary Table 35:** Enrichment for regions bound by NRSF in human Jurkat cells. **(a)** The top ten proximal binding gene-based enrichments (reproduced from ref. 19). **(b)** GREAT *cis*-regulatory element enrichments for all regions bound by NRSF.

**a Gene-based GO Enrichments of NRSF Promoter Binding Peaks**

| Term                       | p-value                |
|----------------------------|------------------------|
| membrane                   | $1.33 \times 10^{-43}$ |
| ion transport              | $9.35 \times 10^{-37}$ |
| calcium ion binding        | $4.27 \times 10^{-31}$ |
| synaptic transmission      | $4.45 \times 10^{-29}$ |
| integral to membrane       | $2.67 \times 10^{-28}$ |
| ion channel activity       | $5.82 \times 10^{-21}$ |
| nervous system development | $2.19 \times 10^{-20}$ |
| potassium ion binding      | $7.49 \times 10^{-20}$ |
| potassium ion transport    | $1.87 \times 10^{-19}$ |
| protein binding            | $1.14 \times 10^{-18}$ |

**b**

**GREAT Enrichments of NRSF Binding Peaks in Human Jurkat Cells**

| Ontology                  | Term                                                                                                                                                                                   | Binomial Results |            |                 | Hypergeometric Results |                 |                    |
|---------------------------|----------------------------------------------------------------------------------------------------------------------------------------------------------------------------------------|------------------|------------|-----------------|------------------------|-----------------|--------------------|
|                           |                                                                                                                                                                                        | Raw P-Value      | FDR Q-Val  | Fold Enrichment | FDR Q-Val              | Fold Enrichment | Observed Gene Hits |
| GO Molecular Function     | gated channel activity                                                                                                                                                                 | 1.5996e-15       | 1.4931e-12 | 2.0570          | 8.0373e-21             | 2.8621          | 102                |
|                           | cation channel activity                                                                                                                                                                | 7.9288e-12       | 2.0182e-9  | 2.0126          | 4.4314e-17             | 2.8284          | 84                 |
|                           | voltage-gated ion channel activity                                                                                                                                                     | 1.5717e-11       | 3.6673e-9  | 2.1760          | 6.3725e-12             | 2.7647          | 62                 |
|                           | voltage-gated cation channel activity                                                                                                                                                  | 1.5840e-8        | 2.9567e-6  | 2.1059          | 3.3303e-11             | 3.0330          | 50                 |
|                           | potassium ion binding                                                                                                                                                                  | 5.4853e-8        | 9.0346e-6  | 2.0888          | 1.6418e-8              | 2.8154          | 43                 |
|                           | extracellular ligand-gated ion channel activity                                                                                                                                        | 2.6791e-6        | 0.0004     | 2.2487          | 8.5382e-7              | 3.2082          | 28                 |
|                           | excitatory extracellular ligand-gated ion channel activity                                                                                                                             | 3.1568e-6        | 0.0004     | 2.4910          | 3.5373e-6              | 3.6860          | 21                 |
|                           | voltage-gated calcium channel activity                                                                                                                                                 | 4.1770e-5        | 0.0045     | 2.9562          | 0.0018                 | 3.8075          | 12                 |
|                           | neurotransmitter transporter activity                                                                                                                                                  | 5.1973e-5        | 0.0050     | 4.1286          | 0.0429                 | 3.3749          | 9                  |
|                           | glutamate receptor activity                                                                                                                                                            | 8.0650e-5        | 0.0066     | 2.1672          | 1.0008e-7              | 4.9498          | 18                 |
| GO Biological Process     | neurotransmitter transport                                                                                                                                                             | 1.9784e-9        | 1.1463e-6  | 2.9707          | 3.9691e-5              | 2.9790          | 26                 |
|                           | potassium ion transport                                                                                                                                                                | 4.4179e-9        | 2.3040e-6  | 2.0745          | 7.3303e-10             | 2.8428          | 51                 |
|                           | secretion by cell                                                                                                                                                                      | 4.8275e-6        | 0.0011     | 2.0303          | 0.0097                 | 1.9980          | 31                 |
|                           | acid secretion                                                                                                                                                                         | 0.0003           | 0.0269     | 3.6490          | 0.0319                 | 4.9498          | 6                  |
| GO Cellular Component     | ion channel complex                                                                                                                                                                    | 2.4766e-9        | 3.4425e-7  | 2.2568          | 2.0454e-11             | 3.0393          | 49                 |
|                           | cation channel complex                                                                                                                                                                 | 4.3799e-9        | 5.2184e-7  | 2.2729          | 4.1686e-11             | 3.1461          | 45                 |
|                           | voltage-gated potassium channel complex                                                                                                                                                | 3.6769e-6        | 0.0002     | 2.1709          | 3.7475e-7              | 3.0554          | 30                 |
|                           | synaptic vesicle                                                                                                                                                                       | 6.6753e-6        | 0.0003     | 2.5735          | 0.0001                 | 3.1349          | 19                 |
|                           | voltage-gated calcium channel complex                                                                                                                                                  | 5.2759e-5        | 0.0022     | 3.2663          | 0.0039                 | 3.7498          | 10                 |
|                           | calcium channel complex                                                                                                                                                                | 0.0003           | 0.0100     | 2.6667          | 0.0027                 | 3.6298          | 11                 |
|                           | synaptosome                                                                                                                                                                            | 0.0011           | 0.0257     | 2.0738          | 0.0094                 | 2.5384          | 16                 |
| Mouse Phenotype           | abnormal synaptic transmission                                                                                                                                                         | 8.3480e-26       | 4.8260e-22 | 2.0782          | 6.8005e-35             | 3.0600          | 148                |
|                           | abnormal CNS synaptic transmission                                                                                                                                                     | 2.0501e-22       | 5.9257e-19 | 2.0843          | 1.2993e-31             | 3.1427          | 128                |
|                           | abnormal miniature excitatory postsynaptic currents                                                                                                                                    | 8.7322e-13       | 1.0096e-9  | 4.5723          | 3.7452e-8              | 4.8982          | 19                 |
|                           | abnormal excitatory postsynaptic currents                                                                                                                                              | 8.0395e-12       | 7.7461e-9  | 2.7837          | 5.8037e-11             | 3.8957          | 34                 |
|                           | abnormal neurotransmitter level                                                                                                                                                        | 7.9516e-11       | 6.5669e-8  | 3.0199          | 2.6786e-6              | 3.2737          | 25                 |
|                           | abnormal touch/ nociception                                                                                                                                                            | 1.5816e-10       | 1.1429e-7  | 2.1530          | 2.6007e-12             | 2.9355          | 58                 |
|                           | abnormal inhibitory postsynaptic currents                                                                                                                                              | 7.7688e-10       | 4.0828e-7  | 3.0215          | 2.7203e-9              | 4.2057          | 26                 |
|                           | abnormal neurotransmitter secretion                                                                                                                                                    | 1.0699e-9        | 4.7578e-7  | 3.0365          | 0.0001                 | 3.1131          | 20                 |
|                           | abnormal circulating potassium level                                                                                                                                                   | 3.2989e-8        | 1.1218e-5  | 4.4168          | 0.0026                 | 3.9284          | 10                 |
|                           | abnormal pain threshold                                                                                                                                                                | 3.5390e-8        | 1.1366e-5  | 2.1291          | 1.8127e-8              | 2.8400          | 42                 |
| PANTHER pathway           | Ionotropic glutamate receptor pathway                                                                                                                                                  | 4.0644e-5        | 0.0020     | 2.2878          | 2.3182e-6              | 3.9284          | 20                 |
|                           | Synaptic vesicle trafficking                                                                                                                                                           | 0.0002           | 0.0066     | 3.5920          | 0.0080                 | 3.7123          | 9                  |
| Predicted Promoter Motifs | Genes with promoter regions [-2kb,2kb] around transcription start site containing the motif TTCAGCACCACGACAGMGCC which matches annotation for REST: RE1-silencing transcription factor | 6.8383e-47       | 4.2055e-44 | 5.5282          | 9.6830e-55             | 6.9332          | 79                 |
|                           | Genes with promoter regions [-2kb,2kb] around transcription start site containing motif CAGNWMCNNGAC. Motif does not match any known transcription factor                              | 8.0892e-30       | 2.4874e-27 | 4.9207          | 6.4693e-30             | 5.5321          | 57                 |
| InterPro                  | Ion transport                                                                                                                                                                          | 6.8644e-7        | 0.0009     | 2.0443          | 4.7124e-10             | 3.3784          | 43                 |
|                           | Extracellular ligand-binding receptor                                                                                                                                                  | 2.3723e-5        | 0.0112     | 2.2839          | 6.5158e-6              | 4.3540          | 19                 |
|                           | Neurotransmitter-gated ion-channel, conserved site                                                                                                                                     | 0.0001           | 0.0339     | 2.6041          | 0.0072                 | 3.0696          | 16                 |
|                           | Neurotransmitter-gated ion-channel ligand-binding                                                                                                                                      | 0.0001           | 0.0339     | 2.6041          | 0.0072                 | 3.0696          | 16                 |
|                           | Neurotransmitter-gated ion-channel                                                                                                                                                     | 0.0001           | 0.0339     | 2.6041          | 0.0072                 | 3.0696          | 16                 |
|                           | Neurotransmitter-gated ion-channel transmembrane region                                                                                                                                | 0.0001           | 0.0339     | 2.6041          | 0.0072                 | 3.0696          | 16                 |
|                           | Voltage-dependent potassium channel                                                                                                                                                    | 0.0002           | 0.0314     | 2.3935          | 0.0003                 | 3.9998          | 16                 |
| HGNC Gene Families        | CACN                                                                                                                                                                                   | 1.0532e-7        | 1.2533e-5  | 3.9509          | 0.0001                 | 4.2898          | 13                 |
|                           | KCN                                                                                                                                                                                    | 3.7073e-6        | 0.0003     | 2.0175          | 1.3878e-8              | 3.2442          | 35                 |
|                           | KV                                                                                                                                                                                     | 0.0003           | 0.0114     | 2.1680          | 3.5454e-7              | 4.2306          | 20                 |



**Supplementary Table 36: “Gene-based GREAT” enrichments of all genes that possess an NRSF binding peak within 2 kb of its transcription start site. Shown are the top ten hypergeometric enriched terms at a false discovery rate of 0.05.**

| Ontology              | Term                                                                              | Hypergeometric Results |            |                    |
|-----------------------|-----------------------------------------------------------------------------------|------------------------|------------|--------------------|
|                       | Name                                                                              | Raw P-Value            | FDR Q-Val  | Observed Gene Hits |
| GO Molecular Function | gated channel activity                                                            | 7.0232e-10             | 1.9665e-6  | 29                 |
|                       | channel activity                                                                  | 2.2608e-8              | 3.1511e-5  | 31                 |
|                       | ion channel activity                                                              | 2.7122e-8              | 2.5314e-5  | 30                 |
|                       | substrate specific channel activity                                               | 4.6749e-8              | 3.2724e-5  | 30                 |
|                       | transporter activity                                                              | 9.4968e-8              | 5.3177e-5  | 60                 |
|                       | extracellular ligand-gated ion channel activity                                   | 2.8926e-7              | 0.0001     | 12                 |
|                       | glutamate receptor activity                                                       | 6.6412e-7              | 0.0003     | 8                  |
|                       | metal ion transmembrane transporter activity                                      | 8.2976e-7              | 0.0003     | 24                 |
|                       | ion transmembrane transporter activity                                            | 1.0130e-6              | 0.0003     | 41                 |
|                       | transmembrane transporter activity                                                | 1.0398e-6              | 0.0003     | 47                 |
| GO Biological Process | synaptic transmission                                                             | 4.5482e-12             | 2.3719e-8  | 29                 |
|                       | transmission of nerve impulse                                                     | 1.1148e-11             | 2.9069e-8  | 31                 |
|                       | cell-cell signaling                                                               | 4.8939e-8              | 8.5073e-5  | 38                 |
|                       | secretion                                                                         | 6.4895e-8              | 8.4607e-5  | 22                 |
|                       | ion transport                                                                     | 3.2498e-7              | 0.0003     | 42                 |
|                       | transport                                                                         | 5.3108e-7              | 0.0005     | 102                |
|                       | localization                                                                      | 6.3871e-7              | 0.0005     | 114                |
|                       | establishment of localization                                                     | 7.2216e-7              | 0.0005     | 102                |
|                       | secretion by cell                                                                 | 1.1111e-6              | 0.0006     | 15                 |
|                       | generation of a signal involved in cell-cell signaling                            | 1.2422e-6              | 0.0006     | 10                 |
| GO Cellular Component | synapse                                                                           | 3.5143e-14             | 2.9310e-11 | 34                 |
|                       | cell junction                                                                     | 4.3555e-10             | 1.8166e-7  | 38                 |
|                       | synapse part                                                                      | 1.7587e-9              | 4.8892e-7  | 22                 |
|                       | plasma membrane part                                                              | 6.6004e-9              | 1.7932e-6  | 87                 |
|                       | neuron projection                                                                 | 3.0639e-7              | 5.1107e-5  | 16                 |
|                       | membrane part                                                                     | 3.7971e-7              | 5.2780e-5  | 195                |
|                       | synaptic vesicle                                                                  | 4.8957e-7              | 5.8341e-5  | 10                 |
|                       | membrane                                                                          | 7.3689e-7              | 7.6800e-5  | 225                |
|                       | intrinsic to membrane                                                             | 4.1052e-6              | 0.0004     | 173                |
|                       | integral to membrane                                                              | 4.6276e-6              | 0.0004     | 170                |
| Mouse Phenotype       | abnormal synaptic transmission                                                    | 1.1494e-24             | 6.6450e-21 | 55                 |
|                       | abnormal CNS synaptic transmission                                                | 3.8354e-23             | 1.1086e-19 | 49                 |
|                       | abnormal nervous system physiology                                                | 8.2355e-22             | 1.5985e-18 | 86                 |
|                       | abnormal behavior                                                                 | 9.9315e-18             | 1.4354e-14 | 102                |
|                       | nervous system phenotype                                                          | 1.3544e-15             | 1.5659e-12 | 110                |
|                       | abnormal nervous system electrophysiology                                         | 1.9843e-13             | 1.9119e-10 | 27                 |
|                       | abnormal motor capabilities/coordination/movement                                 | 1.4200e-12             | 1.1727e-9  | 71                 |
|                       | abnormal excitatory postsynaptic currents                                         | 3.3137e-11             | 2.3946e-8  | 16                 |
|                       | abnormal anxiety-related response                                                 | 1.5544e-10             | 1.0049e-7  | 21                 |
|                       | seizures                                                                          | 2.3286e-10             | 1.3462e-7  | 27                 |
| PANTHER Pathway       | Ionotropic glutamate receptor pathway                                             | 9.0651e-5              | 0.0136     | 7                  |
|                       | Synaptic vesicle trafficking                                                      | 0.0001                 | 0.0095     | 5                  |
|                       | Metabotropic glutamate receptor group III pathway                                 | 0.0002                 | 0.0104     | 8                  |
|                       | Opioid proenkephalin pathway                                                      | 0.0011                 | 0.0413     | 5                  |
|                       | Heterotrimeric G-protein signaling pathway-Gq alpha and Gq alpha mediated pathway | 0.0012                 | 0.0364     | 9                  |
|                       | Endogenous cannabinoid signaling                                                  | 0.0013                 | 0.0313     | 4                  |
|                       | Opioid proopiomelanocortin pathway                                                | 0.0013                 | 0.0273     | 5                  |
|                       | Genes involved in neuroactive ligand-receptor interaction                         | 5.7412e-10             | 4.0533e-7  | 27                 |

| Ontology                  | Term                                                                                                                                                                                                            | Hypergeometric Results |             |                    |
|---------------------------|-----------------------------------------------------------------------------------------------------------------------------------------------------------------------------------------------------------------|------------------------|-------------|--------------------|
|                           | Name                                                                                                                                                                                                            | Raw P-Value            | FDR Q-Val   | Observed Gene Hits |
| MSigDB Perturbation       | Downregulated in correlation with overt Alzheimer's Disease, in the CA1 region of the hippocampus                                                                                                               | 1.3391e-9              | 1.2199e-6   | 64                 |
|                           | The 30 genes showing the greatest decrease in expression in NSa Ews/Flr-1 infectants                                                                                                                            | 4.2760e-5              | 0.0195      | 6                  |
| Predicted Promoter Motifs | Genes highly associated with favorable response to treatment for medulloblastoma                                                                                                                                | 0.0001                 | 0.0448      | 6                  |
|                           | Genes with promoter regions [-2kb 2kb] around transcription start site containing the motif TTCAGCACCCGACAGMGCC which matches annotation for REST: RE1-silencing transcription factor                           | 9.1016e-108            | 5.5975e-105 | 77                 |
|                           | Genes with promoter regions [-2kb 2kb] around transcription start site containing motif CAGNWMCNNGSAC. Motif does not match any known transcription factor                                                      | 5.2045e-65             | 1.6004e-62  | 54                 |
|                           | Genes with promoter regions [-2kb 2kb] around transcription start site containing motif GGARNTKYCCA. Motif does not match any known transcription factor                                                        | 8.9388e-12             | 1.8325e-9   | 17                 |
|                           | Genes with promoter regions [-2kb 2kb] around transcription start site containing the motif GGGAGGRR which matches annotation for MAZ: MYC-associated zinc finger protein (purine-binding transcription factor) | 6.0069e-9              | 9.2366e-7   | 99                 |
|                           | Genes with promoter regions [-2kb 2kb] around transcription start site containing the motif CYYTGACGTCA which matches annotation for ATF1: activating transcription factor 1                                    | 2.7615e-8              | 3.3967e-6   | 23                 |
|                           | Genes with promoter regions [-2kb 2kb] around transcription start site containing the motif GGGCGSR which matches annotation for SP1: Sp1 transcription factor                                                  | 1.9629e-7              | 2.0120e-5   | 114                |
|                           | Genes with promoter regions [-2kb 2kb] around transcription start site containing motif NTGACGTGANYS. Motif does not match any known transcription factor                                                       | 9.4521e-7              | 8.3044e-5   | 18                 |
|                           | Genes with promoter regions [-2kb 2kb] around transcription start site containing motif AACTTT. Motif does not match any known transcription factor                                                             | 2.0885e-6              | 0.0002      | 79                 |
|                           | Genes with promoter regions [-2kb 2kb] around transcription start site containing the motif VGTGACGTMACN which matches annotation for ATF2: activating transcription factor 2                                   | 2.6193e-6              | 0.0002      | 21                 |
| InterPro                  | Genes with promoter regions [-2kb 2kb] around transcription start site containing the motif TCAVYRTCA which matches annotation for ATF3: activating transcription factor 3                                      | 3.0665e-6              | 0.0002      | 32                 |
|                           | Potassium channel, voltage-dependent, Eag/Elk/ERG                                                                                                                                                               | 2.3347e-7              | 0.0015      | 6                  |
|                           | Gamma-aminobutyric acid A receptor                                                                                                                                                                              | 5.8761e-6              | 0.0194      | 6                  |
|                           | Cyclic nucleotide-binding, conserved site                                                                                                                                                                       | 8.9400e-6              | 0.0196      | 7                  |
|                           | Cyclic nucleotide-binding                                                                                                                                                                                       | 1.4135e-5              | 0.0233      | 7                  |
|                           | Ion transport                                                                                                                                                                                                   | 1.7025e-5              | 0.0224      | 12                 |
|                           | Chromogranin/secretogranin                                                                                                                                                                                      | 1.7153e-5              | 0.0188      | 3                  |
|                           | Cyclic nucleotide-binding-like                                                                                                                                                                                  | 2.6410e-5              | 0.0249      | 7                  |
|                           | Extracellular ligand-binding receptor                                                                                                                                                                           | 3.2061e-5              | 0.0264      | 7                  |
|                           | RmlC-like jelly roll fold                                                                                                                                                                                       | 3.8670e-5              | 0.0283      | 7                  |
| HGNC Gene Families        | Chromogranin, conserved site                                                                                                                                                                                    | 6.7292e-5              | 0.0443      | 3                  |
|                           | KV                                                                                                                                                                                                              | 5.5253e-5              | 0.0132      | 7                  |
|                           | CNG                                                                                                                                                                                                             | 8.1707e-5              | 0.0097      | 4                  |
|                           | KCN                                                                                                                                                                                                             | 0.0005                 | 0.0395      | 9                  |

**Supplementary Table 37:** GREAT enrichments of NRSF using the *basal plus extension* association rule with a maximum a basal regulatory region extending 5 kb upstream and 1 kb downstream of the transcription start site and extension of 50 kb. Shown are the top ten binomial enriched terms at a false discovery rate of 0.05 with a fold enrichment of at least two that are also significant by the hypergeometric test, using the highest-scoring NRSF peaks anywhere in the genome (QuEST score > 1; n = 1,712).

| Ontology                                            | Term                                                                                                                                                                                                                                                                      | Binomial Results                                                                 |            |                 | Hypergeometric Results |                 |                    |     |
|-----------------------------------------------------|---------------------------------------------------------------------------------------------------------------------------------------------------------------------------------------------------------------------------------------------------------------------------|----------------------------------------------------------------------------------|------------|-----------------|------------------------|-----------------|--------------------|-----|
|                                                     |                                                                                                                                                                                                                                                                           | Raw P-Value                                                                      | FDR Q-Val  | Fold Enrichment | FDR Q-Val              | Fold Enrichment | Observed Gene Hits |     |
| GO Molecular Function                               | transporter activity                                                                                                                                                                                                                                                      | 6.047e-37                                                                        | 8.429e-34  | 3.2142          | 3.775e-15              | 2.0537          | 159                |     |
|                                                     | ion transmembrane transporter activity                                                                                                                                                                                                                                    | 1.4345e-35                                                                       | 1.338e-32  | 3.5765          | 1.5131e-16             | 2.5472          | 105                |     |
|                                                     | ion channel activity                                                                                                                                                                                                                                                      | 7.3009e-35                                                                       | 5.1107e-32 | 5.2112          | 4.0315e-22             | 3.7223          | 80                 |     |
|                                                     | gated channel activity                                                                                                                                                                                                                                                    | 1.2489e-34                                                                       | 6.9836e-32 | 5.7506          | 2.6124e-23             | 4.2295          | 73                 |     |
|                                                     | channel activity                                                                                                                                                                                                                                                          | 2.7445e-34                                                                       | 1.2608e-31 | 5.0561          | 1.2034e-21             | 3.5522          | 81                 |     |
|                                                     | substrate specific channel activity                                                                                                                                                                                                                                       | 2.9600e-34                                                                       | 1.1843e-31 | 5.1105          | 1.4460e-21             | 3.6330          | 80                 |     |
|                                                     | substrate-specific transmembrane transporter activity                                                                                                                                                                                                                     | 6.2047e-33                                                                       | 2.1716e-30 | 3.5955          | 1.2439e-14             | 2.3429          | 108                |     |
|                                                     | substrate-specific transporter activity                                                                                                                                                                                                                                   | 1.4575e-31                                                                       | 4.5345e-29 | 3.2575          | 1.3710e-12             | 2.1138          | 115                |     |
|                                                     | transmembrane transporter activity                                                                                                                                                                                                                                        | 1.5942e-31                                                                       | 4.4829e-29 | 3.2491          | 1.4798e-13             | 2.1278          | 112                |     |
|                                                     | cation transmembrane transporter activity                                                                                                                                                                                                                                 | 1.4411e-30                                                                       | 3.6820e-28 | 4.1753          | 1.2832e-13             | 2.6651          | 80                 |     |
|                                                     | GO Biological Process                                                                                                                                                                                                                                                     | ion transport                                                                    | 2.9784e-33 | 1.6532e-29      | 3.7580                 | 3.0373e-16      | 2.5410             | 104 |
|                                                     |                                                                                                                                                                                                                                                                           | system process                                                                   | 5.3380e-32 | 1.3914e-28      | 2.9392                 | 6.9389e-9       | 1.7673             | 140 |
|                                                     |                                                                                                                                                                                                                                                                           | localization                                                                     | 6.0045e-32 | 1.3814e-29      | 2.1505                 | 4.9311e-5       | 1.4009             | 235 |
| transport                                           |                                                                                                                                                                                                                                                                           | 1.4320e-30                                                                       | 1.8849e-27 | 2.2968          | 4.8369e-5              | 1.4359          | 238                |     |
| establishment of localization                       |                                                                                                                                                                                                                                                                           | 3.7790e-30                                                                       | 3.9334e-27 | 2.2323          | 7.7261e-6              | 1.4300          | 209                |     |
| neurological system process                         |                                                                                                                                                                                                                                                                           | 4.7935e-29                                                                       | 4.1885e-26 | 3.0060          | 9.4397e-8              | 1.8381          | 117                |     |
| cell-cell signaling                                 |                                                                                                                                                                                                                                                                           | 5.5295e-29                                                                       | 3.6045e-26 | 3.9369          | 2.9981e-12             | 2.5469          | 83                 |     |
| synaptic transmission                               |                                                                                                                                                                                                                                                                           | 1.2908e-28                                                                       | 7.5316e-26 | 5.0079          | 2.2588e-15             | 3.9190          | 55                 |     |
| transmission of nerve impulse                       |                                                                                                                                                                                                                                                                           | 9.3418e-28                                                                       | 4.4289e-25 | 5.2437          | 1.0442e-14             | 3.5629          | 58                 |     |
| cation transport                                    |                                                                                                                                                                                                                                                                           | 1.7340e-25                                                                       | 7.5356e-23 | 3.6527          | 2.1494e-10             | 2.5114          | 73                 |     |
| GO Cellular Component                               |                                                                                                                                                                                                                                                                           | membrane part                                                                    | 6.9551e-50 | 5.6014e-53      | 2.0726                 | 2.3909e-14      | 1.3737             | 453 |
|                                                     |                                                                                                                                                                                                                                                                           | intrinsic to membrane                                                            | 6.7802e-51 | 1.8849e-48      | 2.0981                 | 9.8117e-13      | 1.3791             | 405 |
|                                                     |                                                                                                                                                                                                                                                                           | integral to membrane                                                             | 4.1574e-50 | 6.6824e-48      | 2.1010                 | 4.5860e-12      | 1.3720             | 395 |
|                                                     | plasma membrane                                                                                                                                                                                                                                                           | 6.6802e-41                                                                       | 7.8396e-39 | 2.2132          | 4.5703e-12             | 1.4546          | 295                |     |
|                                                     | synapse                                                                                                                                                                                                                                                                   | 4.8500e-34                                                                       | 5.0555e-32 | 5.8005          | 1.7935e-20             | 4.0071          | 86                 |     |
|                                                     | plasma membrane part                                                                                                                                                                                                                                                      | 1.6670e-32                                                                       | 1.5633e-30 | 2.4986          | 2.0720e-13             | 1.7704          | 189                |     |
|                                                     | cell junction                                                                                                                                                                                                                                                             | 9.2208e-23                                                                       | 7.6900e-21 | 3.6649          | 1.4326e-12             | 2.6520          | 73                 |     |
|                                                     | synapse part                                                                                                                                                                                                                                                              | 1.3216e-22                                                                       | 1.0030e-20 | 5.7513          | 1.5971e-14             | 4.2339          | 46                 |     |
|                                                     | intrinsic to plasma membrane                                                                                                                                                                                                                                              | 1.4625e-17                                                                       | 1.0213e-15 | 2.2314          | 9.9125e-7              | 1.6236          | 114                |     |
|                                                     | integral to plasma membrane                                                                                                                                                                                                                                               | 2.3709e-17                                                                       | 1.5248e-15 | 2.3365          | 1.1971e-6              | 1.6679          | 112                |     |
|                                                     | Mouse Phenotype                                                                                                                                                                                                                                                           | abnormal synaptic transmission                                                   | 6.2653e-68 | 3.8339e-62      | 6.8925                 | 6.0945e-37      | 4.4815             | 105 |
|                                                     |                                                                                                                                                                                                                                                                           | abnormal nervous system physiology                                               | 1.1236e-63 | 3.2446e-60      | 4.0520                 | 1.5474e-30      | 2.6955             | 158 |
|                                                     |                                                                                                                                                                                                                                                                           | abnormal CNS synaptic transmission                                               | 2.3540e-67 | 4.8132e-54      | 7.0194                 | 2.4808e-31      | 4.5106             | 89  |
| abnormal behavior                                   |                                                                                                                                                                                                                                                                           | 6.7353e-55                                                                       | 1.2636e-51 | 3.1418          | 3.1607e-24             | 2.1494          | 205                |     |
| abnormal system phenotype                           |                                                                                                                                                                                                                                                                           | 9.0571e-54                                                                       | 1.0472e-50 | 2.8731          | 1.5233e-20             | 1.9548          | 223                |     |
| abnormal motor control/coordination/movement        |                                                                                                                                                                                                                                                                           | 1.6455e-35                                                                       | 3.0374e-32 | 3.0524          | 2.0301e-14             | 1.1032          | 138                |     |
| abnormal nervous system electrophysiology           |                                                                                                                                                                                                                                                                           | 3.4018e-33                                                                       | 2.4617e-27 | 6.7149          | 5.2105e-14             | 4.2136          | 45                 |     |
| abnormal sensory capabilities/reflex/innervation    |                                                                                                                                                                                                                                                                           | 3.6530e-28                                                                       | 2.3526e-25 | 4.3567          | 1.7760e-13             | 2.9590          | 68                 |     |
| abnormal locomotor activity                         |                                                                                                                                                                                                                                                                           | 4.3811e-28                                                                       | 2.6327e-25 | 3.1885          | 1.1111e-11             | 2.1838          | 104                |     |
| abnormal voluntary movement                         |                                                                                                                                                                                                                                                                           | 1.9590e-27                                                                       | 1.0510e-24 | 3.0521          | 4.3739e-11             | 2.1017          | 107                |     |
| PANTHER Pathway                                     |                                                                                                                                                                                                                                                                           | ionotropic glutamate receptor pathway                                            | 9.4313e-14 | 1.4147e-11      | 9.7430                 | 1.0195e-5       | 6.0520             | 15  |
|                                                     |                                                                                                                                                                                                                                                                           | Mitral/tropomyosin receptor group II pathway                                     | 1.0737e-8  | 8.0531e-7       | 5.5293                 | 0.0130          | 3.2437             | 12  |
|                                                     |                                                                                                                                                                                                                                                                           | Patententriem G-protein signaling pathway-Gq alpha and Go alpha mediated pathway | 1.7135e-7  | 8.9674e-6       | 4.1687                 | 0.0297          | 2.5292             | 15  |
|                                                     | Synaptic vesicle trafficking                                                                                                                                                                                                                                              | 3.2067e-7                                                                        | 1.3021e-5  | 10.4726         | 0.0070                 | 5.9604          | 7                  |     |
| MSigDB Pathway Predicted Promoter Motifs            | Genes involved in neuroactive ligand-receptor interaction                                                                                                                                                                                                                 | 3.9134e-14                                                                       | 2.7639e-11 | 3.7849          | 6.0367e-7              | 2.8049          | 42                 |     |
|                                                     | Genes with promoter regions [-2kb,2kb] around transcription start site containing the motif TTCAACCACCCACCCACACAGCC which matches annotation for REST: RE1-binding transcription factor                                                                                   | 1.0180e-94                                                                       | 5.2610e-90 | 22.3055         | 4.8419e-75             | 13.9498         | 77                 |     |
|                                                     | Genes with promoter regions [-2kb,2kb] around transcription start site containing motif CAGNVMCNNNGAC. Motif does not match any known transcription factor                                                                                                                | 3.8165e-62                                                                       | 1.1738e-59 | 18.2699         | 7.0480e-45             | 11.2136         | 56                 |     |
|                                                     | Genes with promoter regions [-2kb,2kb] around transcription start site containing the motif GGGAGGRR which matches annotation for MAZ: MYC-associated zinc finger protein (pioneer-binding transcription factor)                                                          | 9.0955e-31                                                                       | 2.0265e-28 | 2.3524          | 1.1323e-6              | 1.4894          | 189                |     |
|                                                     | Genes with promoter regions [-2kb,2kb] around transcription start site containing the motif CAGGTG which matches annotation for TCF3: transcription factor 3 (E2F4 immunoglobulin enhancer binding factors E12E47)                                                        | 2.1521e-25                                                                       | 3.3089e-23 | 2.1239          | 9.3055e-5              | 1.3942          | 191                |     |
|                                                     | Genes with promoter regions [-2kb,2kb] around transcription start site containing motif GTGCAGY. Motif does not match any known transcription factor                                                                                                                      | 7.1449e-16                                                                       | 7.3225e-14 | 2.6830          | 0.0012                 | 1.6715          | 69                 |     |
|                                                     | Genes with promoter regions [-2kb,2kb] around transcription start site containing the motif GTGGGCGRRS which matches annotation for EGR1: early growth response 1 (E2F-2, EGR2, early growth response 2 [Krox-20 homolog, Drosophila]-like; EGR3: early growth response 3 | 5.2202e-15                                                                       | 5.4649e-13 | 4.0519          | 0.0009                 | 2.2270          | 34                 |     |
|                                                     | Genes with promoter regions [-2kb,2kb] around transcription start site containing the motif CAGGTG which matches annotation for REP1K1: replication inhibitor 1                                                                                                           | 4.6152e-14                                                                       | 3.5479e-12 | 2.0612          | 0.0242                 | 1.3323          | 110                |     |
|                                                     | Genes with promoter regions [-2kb,2kb] around transcription start site containing the motif GCANCTGNY which matches annotation for MYO11: myogenic differentiation 1                                                                                                      | 4.3084e-13                                                                       | 2.6603e-11 | 2.3302          | 0.0113                 | 1.4911          | 76                 |     |
|                                                     | Genes with promoter regions [-2kb,2kb] around transcription start site containing the motif GGTGGRR which matches annotation for PAX4: paired box gene 4                                                                                                                  | 1.3061e-12                                                                       | 7.3021e-11 | 2.1073          | 0.0396                 | 1.3337          | 95                 |     |
|                                                     | Genes with promoter regions [-2kb,2kb] around transcription start site containing the motif WTGCGTGGCGK which matches annotation for EGR1: early growth response 1                                                                                                        | 5.7309e-11                                                                       | 2.9371e-9  | 3.6524          | 0.0122                 | 1.9634          | 29                 |     |
|                                                     | InterPro                                                                                                                                                                                                                                                                  | ion transport                                                                    | 2.5451e-15 | 1.6271e-11      | 6.0594                 | 7.6339e-9       | 4.7034             | 29  |
|                                                     |                                                                                                                                                                                                                                                                           | immunoglobulin subtype 2                                                         | 7.0948e-11 | 2.3927e-7       | 3.7763                 | 0.0007          | 2.6936             | 31  |
| immunoglobulin                                      |                                                                                                                                                                                                                                                                           | 1.5610e-10                                                                       | 3.4275e-7  | 3.9469          | 0.0007                 | 2.7917          | 30                 |     |
| immunoglobulin-like                                 |                                                                                                                                                                                                                                                                           | 1.6670e-10                                                                       | 2.7269e-7  | 2.7684          | 0.0023                 | 1.9635          | 52                 |     |
| Fibronectin, type III                               |                                                                                                                                                                                                                                                                           | 5.6745e-9                                                                        | 7.4755e-6  | 3.4745          | 0.0169                 | 2.3352          | 25                 |     |
| Potassium channel, voltage-dependent, eag-like/KERS |                                                                                                                                                                                                                                                                           | 7.3799e-9                                                                        | 8.1019e-6  | 16.4212         | 4.9491e-6              | 12.7723         | 9                  |     |
| immunoglobulin-like fold                            |                                                                                                                                                                                                                                                                           | 9.9242e-9                                                                        | 9.3807e-6  | 2.5539          | 0.0101                 | 1.8653          | 48                 |     |
| Extracellular ligand-binding receptor               |                                                                                                                                                                                                                                                                           | 1.0545e-8                                                                        | 6.6027e-6  | 7.5995          | 0.0007                 | 5.6796          | 12                 |     |
| immunoglobulin subtype                              |                                                                                                                                                                                                                                                                           | 2.2621e-8                                                                        | 1.6555e-5  | 2.5468          | 0.0054                 | 2.1359          | 37                 |     |
| Fibronectin, type III-like fold                     |                                                                                                                                                                                                                                                                           | 3.0799e-8                                                                        | 2.0761e-5  | 3.2203          | 0.0497                 | 2.1502          | 25                 |     |
| TreeFam                                             |                                                                                                                                                                                                                                                                           | Voltage-dependent calcium channel subunit                                        | 6.9969e-7  | 0.0014          | 20.3894                | 0.0327          | 14.1914            | 5   |
|                                                     |                                                                                                                                                                                                                                                                           | Carcinoma/benign antigen-related cell adhesion molecule precursor                | 1.4360e-5  | 0.0020          | 13.2316                | 0.0232          | 8.5148             | 7   |
|                                                     |                                                                                                                                                                                                                                                                           | Potassium voltage-gated channel subfamily C member                               | 5.4018e-5  | 0.0194          | 20.2593                | 0.0326          | 17.0297            | 4   |
|                                                     | HGNC Gene Families                                                                                                                                                                                                                                                        | CALN                                                                             | 7.2188e-12 | 1.2174e-9       | 11.8580                | 9.5693e-7       | 8.1742             | 12  |
| KCN                                                 |                                                                                                                                                                                                                                                                           | 6.1115e-11                                                                       | 7.2913e-9  | 5.4475          | 1.1526e-7              | 4.3036          | 23                 |     |
| KV                                                  |                                                                                                                                                                                                                                                                           | 2.3813e-7                                                                        | 1.8895e-5  | 8.4011          | 1.4789e-5              | 5.6796          | 13                 |     |
| CAV                                                 |                                                                                                                                                                                                                                                                           | 5.8313e-7                                                                        | 3.4695e-5  | 15.1752         | 0.0042                 | 9.4609          | 5                  |     |
| IG                                                  |                                                                                                                                                                                                                                                                           | 7.2988e-6                                                                        | 0.0003     | 8.3848          | 0.0055                 | 5.4195          | 7                  |     |
| SIGLEC                                              |                                                                                                                                                                                                                                                                           | 1.3745e-5                                                                        | 0.0005     | 17.1394         | 0.0054                 | 8.5148          | 5                  |     |
| CNG                                                 |                                                                                                                                                                                                                                                                           | 0.0001                                                                           | 0.0031     | 11.1712         | 0.0054                 | 8.5148          | 5                  |     |
| ILLR                                                |                                                                                                                                                                                                                                                                           | 0.0013                                                                           | 0.0238     | 14.3456         | 0.0310                 | 7.5697          | 4                  |     |

**Supplementary Table 38:** GREAT enrichments of NRSF using the *two nearest genes* association rule with a maximum extension of 1 Mb. Shown are the top ten binomial enriched terms at a false discovery rate of 0.05 with a fold enrichment of at least two that are also significant by the hypergeometric test, using the highest-scoring NRSF peaks anywhere in the genome (QuEST score > 1; n = 1,712).

| Ontology                  | Term                                                                                                                                                                                  | Binomial Results |            |                 | Hypergeometric Results |                 |                    |
|---------------------------|---------------------------------------------------------------------------------------------------------------------------------------------------------------------------------------|------------------|------------|-----------------|------------------------|-----------------|--------------------|
|                           | Name                                                                                                                                                                                  | Raw P-Value      | FDR Q-Val  | Fold Enrichment | FDR Q-Val              | Fold Enrichment | Observed Gene Hits |
| GO Molecular Function     | ion channel activity                                                                                                                                                                  | 1.5008e-16       | 1.4008e-13 | 2.0023          | 6.1720e-19             | 2.4501          | 120                |
|                           | gated channel activity                                                                                                                                                                | 3.3229e-16       | 1.8608e-13 | 2.0795          | 8.4824e-20             | 2.6942          | 106                |
|                           | cation channel activity                                                                                                                                                               | 3.2797e-12       | 8.3482e-10 | 2.0275          | 1.6745e-15             | 2.6231          | 86                 |
|                           | voltage-gated ion channel activity                                                                                                                                                    | 5.0087e-12       | 1.1687e-9  | 2.2021          | 4.7134e-11             | 2.5851          | 64                 |
|                           | voltage-gated cation channel activity                                                                                                                                                 | 4.5224e-9        | 9.0448e-7  | 2.1481          | 9.2151e-11             | 2.8572          | 52                 |
|                           | potassium ion binding                                                                                                                                                                 | 3.5695e-8        | 5.8791e-6  | 2.1002          | 2.9342e-8              | 2.6688          | 45                 |
|                           | extracellular ligand-gated ion channel activity                                                                                                                                       | 1.4269e-6        | 0.0002     | 2.2818          | 4.1278e-7              | 3.1136          | 30                 |
|                           | excitatory extracellular ligand-gated ion channel activity                                                                                                                            | 1.4400e-6        | 0.0002     | 2.5443          | 6.4384e-7              | 3.6568          | 23                 |
|                           | voltage-gated calcium channel activity                                                                                                                                                | 1.4865e-5        | 0.0015     | 3.0831          | 0.0008                 | 3.7363          | 13                 |
|                           | glutamate receptor activity                                                                                                                                                           | 3.8623e-5        | 0.0037     | 2.2243          | 4.8598e-8              | 4.7327          | 19                 |
| GO Biological Process     | neurotransmitter transport                                                                                                                                                            | 9.5847e-10       | 4.5440e-7  | 2.9995          | 7.1955e-5              | 2.8022          | 27                 |
|                           | potassium ion transport                                                                                                                                                               | 2.9677e-9        | 1.2984e-6  | 2.0824          | 9.8793e-9              | 2.6255          | 52                 |
|                           | secretion                                                                                                                                                                             | 8.0528e-9        | 2.4703e-6  | 2.0025          | 0.0010                 | 1.8342          | 54                 |
|                           | secretion by cell                                                                                                                                                                     | 7.1850e-7        | 0.0002     | 2.1225          | 0.0060                 | 1.9849          | 34                 |
|                           | arachidonic acid secretion                                                                                                                                                            | 3.6236e-5        | 0.0042     | 4.6627          | 0.0123                 | 5.6045          | 6                  |
|                           | acid secretion                                                                                                                                                                        | 8.1250e-5        | 0.0078     | 3.9353          | 0.0069                 | 5.2309          | 7                  |
| GO Cellular Component     | ion channel complex                                                                                                                                                                   | 6.6417e-10       | 6.1546e-8  | 2.3007          | 5.2239e-11             | 2.8655          | 51                 |
|                           | cation channel complex                                                                                                                                                                | 1.1091e-9        | 9.2498e-8  | 2.3220          | 7.4053e-11             | 2.9764          | 47                 |
|                           | synaptic vesicle                                                                                                                                                                      | 3.1677e-6        | 0.0002     | 2.6264          | 0.0005                 | 2.8396          | 19                 |
|                           | voltage-gated potassium channel complex                                                                                                                                               | 4.5769e-6        | 0.0002     | 2.1513          | 3.6780e-6              | 2.7677          | 30                 |
|                           | voltage-gated calcium channel complex                                                                                                                                                 | 4.6569e-6        | 0.0002     | 3.6281          | 0.0002                 | 4.0760          | 12                 |
|                           | calcium channel complex                                                                                                                                                               | 4.3094e-5        | 0.0016     | 2.9492          | 0.0002                 | 3.8858          | 13                 |
|                           | synaptosome                                                                                                                                                                           | 0.0003           | 0.0072     | 2.2240          | 0.0090                 | 2.4430          | 17                 |
| Mouse Phenotype           | abnormal synaptic transmission                                                                                                                                                        | 1.0072e-27       | 5.8228e-24 | 2.1183          | 5.6900e-33             | 2.8655          | 153                |
|                           | abnormal CNS synaptic transmission                                                                                                                                                    | 1.0852e-23       | 2.0911e-20 | 2.1144          | 8.8928e-30             | 2.9357          | 132                |
|                           | abnormal miniature excitatory postsynaptic currents                                                                                                                                   | 1.2321e-12       | 1.4245e-9  | 4.5142          | 2.0726e-7              | 4.4369          | 19                 |
|                           | abnormal excitatory postsynaptic currents                                                                                                                                             | 4.1101e-12       | 3.3944e-9  | 2.8025          | 8.8127e-10             | 3.5288          | 34                 |
|                           | abnormal neurotransmitter level                                                                                                                                                       | 1.1920e-11       | 8.6137e-9  | 3.1088          | 4.2907e-6              | 3.0840          | 26                 |
|                           | abnormal touch/ nociception                                                                                                                                                           | 5.4198e-11       | 3.1332e-8  | 2.1785          | 4.6203e-11             | 2.7048          | 59                 |
|                           | abnormal nervous system electrophysiology                                                                                                                                             | 7.3810e-11       | 3.5558e-8  | 2.0356          | 1.9714e-12             | 2.7099          | 66                 |
|                           | abnormal neurotransmitter secretion                                                                                                                                                   | 4.6761e-10       | 1.8022e-7  | 3.0751          | 0.0001                 | 2.9609          | 21                 |
|                           | abnormal inhibitory postsynaptic currents                                                                                                                                             | 1.0258e-9        | 3.7062e-7  | 2.9924          | 2.4110e-8              | 3.8096          | 26                 |
|                           | abnormal Purkinje cell innervation                                                                                                                                                    | 5.1857e-9        | 1.7635e-6  | 4.5071          | 0.0015                 | 4.9818          | 8                  |
| PANTHER Pathway           | Ionotropic glutamate receptor pathway                                                                                                                                                 | 1.9678e-5        | 0.0010     | 2.3431          | 1.9833e-6              | 3.7363          | 21                 |
|                           | Synaptic vesicle trafficking                                                                                                                                                          | 0.0002           | 0.0056     | 3.5223          | 0.0141                 | 3.3627          | 9                  |
|                           | Endogenous cannabinoid signaling                                                                                                                                                      | 0.0006           | 0.0131     | 3.1383          | 0.0364                 | 3.1464          | 8                  |
|                           | Thyrotropin-releasing hormone receptor signaling pathway                                                                                                                              | 0.0009           | 0.0146     | 2.1123          | 0.0151                 | 2.3444          | 16                 |
|                           | Adrenaline and noradrenaline biosynthesis                                                                                                                                             | 0.0017           | 0.0216     | 2.9317          | 0.0444                 | 2.8022          | 9                  |
| Predicted Promoter Motifs | Genes with promoter regions [-2kb,2kb] around transcription start site containing the motif TTCAGCACCGGACAGMGCC which matches annotation for REST: RE1-silencing transcription factor | 1.0197e-48       | 6.2714e-46 | 5.6078          | 2.2333e-51             | 6.2802          | 79                 |
|                           | Genes with promoter regions [-2kb,2kb] around transcription start site containing motif CAGNWMCNNGAC. Motif does not match any known transcription factor                             | 7.0810e-31       | 2.1774e-28 | 4.9788          | 1.3161e-27             | 5.0111          | 57                 |
| InterPro                  | Ion transport                                                                                                                                                                         | 9.4755e-7        | 0.0012     | 2.0227          | 1.4492e-8              | 3.0602          | 43                 |
|                           | Extracellular ligand-binding receptor                                                                                                                                                 | 1.1280e-5        | 0.0057     | 2.3382          | 5.8512e-6              | 4.1515          | 20                 |
|                           | Neurotransmitter-gated ion-channel, conserved site                                                                                                                                    | 6.1580e-5        | 0.0184     | 2.6979          | 0.0058                 | 2.9543          | 17                 |
|                           | Neurotransmitter-gated ion-channel ligand-binding                                                                                                                                     | 6.1580e-5        | 0.0184     | 2.6979          | 0.0058                 | 2.9543          | 17                 |
|                           | Neurotransmitter-gated ion-channel                                                                                                                                                    | 6.1580e-5        | 0.0184     | 2.6979          | 0.0058                 | 2.9543          | 17                 |
|                           | Neurotransmitter-gated ion-channel transmembrane region                                                                                                                               | 6.1580e-5        | 0.0184     | 2.6979          | 0.0058                 | 2.9543          | 17                 |
|                           | Voltage-dependent potassium channel                                                                                                                                                   | 0.0002           | 0.0293     | 2.3732          | 0.0010                 | 3.6231          | 16                 |
| HGNC Gene Families        | CACN                                                                                                                                                                                  | 3.0307e-8        | 7.2130e-6  | 4.0854          | 4.7129e-5              | 4.1847          | 14                 |
|                           | KCN                                                                                                                                                                                   | 2.2116e-6        | 0.0002     | 2.0396          | 4.8527e-8              | 3.0226          | 36                 |
|                           | SIGLEC                                                                                                                                                                                | 2.3323e-5        | 0.0014     | 15.3330         | 0.0440                 | 4.4836          | 6                  |
|                           | KV                                                                                                                                                                                    | 0.0003           | 0.0129     | 2.1501          | 1.9980e-6              | 3.8321          | 20                 |

**Supplementary Table 39:** GREAT enrichments of NRSF using the *single nearest gene* association rule with a maximum extension of 1 Mb. Shown are the top ten binomial enriched terms at a false discovery rate of 0.05 with a fold enrichment of at least two that are also significant by the hypergeometric test, using the highest-scoring NRSF peaks anywhere in the genome (QuEST score > 1; n = 1,712).

| Ontology                  | Term                                                                                                                                                                                                                                           | Binomial Results |            |                 | Hypergeometric Results |                 |                    |
|---------------------------|------------------------------------------------------------------------------------------------------------------------------------------------------------------------------------------------------------------------------------------------|------------------|------------|-----------------|------------------------|-----------------|--------------------|
|                           |                                                                                                                                                                                                                                                | Raw P-Value      | FDR Q-Val  | Fold Enrichment | FDR Q-Val              | Fold Enrichment | Observed Gene Hits |
| GO Molecular Function     | ion transmembrane transporter activity                                                                                                                                                                                                         | 1.0690e-17       | 1.4964e-14 | 2.0805          | 4.4417e-16             | 2.2959          | 123                |
|                           | gated channel activity                                                                                                                                                                                                                         | 2.5929e-17       | 2.4201e-14 | 2.5132          | 1.6263e-22             | 3.6545          | 82                 |
|                           | ion channel activity                                                                                                                                                                                                                           | 7.2654e-17       | 5.1005e-14 | 2.3690          | 6.7660e-21             | 3.2220          | 90                 |
|                           | substrate specific channel activity                                                                                                                                                                                                            | 1.1789e-16       | 6.6019e-14 | 2.3535          | 2.6181e-20             | 3.1447          | 90                 |
|                           | channel activity                                                                                                                                                                                                                               | 1.4524e-16       | 6.7781e-14 | 2.3351          | 3.1087e-20             | 3.1051          | 91                 |
|                           | cation transmembrane transporter activity                                                                                                                                                                                                      | 2.1382e-15       | 7.4937e-13 | 2.2371          | 1.3490e-12             | 2.9590          | 92                 |
|                           | cation channel activity                                                                                                                                                                                                                        | 1.0594e-13       | 2.6967e-11 | 2.5123          | 4.0842e-16             | 3.5932          | 67                 |
|                           | metal ion transmembrane transporter activity                                                                                                                                                                                                   | 5.0180e-13       | 1.1709e-10 | 2.3499          | 5.6951e-16             | 3.1429          | 71                 |
|                           | voltage-gated ion channel activity                                                                                                                                                                                                             | 1.2704e-11       | 2.7536e-9  | 2.9970          | 2.2137e-11             | 3.3289          | 47                 |
|                           | voltage-gated cation channel activity                                                                                                                                                                                                          | 2.4222e-10       | 4.8444e-8  | 2.6757          | 1.6915e-12             | 3.9501          | 41                 |
| GO Biological Process     | cation transport                                                                                                                                                                                                                               | 8.0678e-13       | 2.1037e-9  | 2.0744          | 5.6735e-10             | 2.2500          | 85                 |
|                           | metal ion transport                                                                                                                                                                                                                            | 4.3665e-12       | 7.5905e-9  | 2.0812          | 3.9176e-11             | 2.4704          | 79                 |
|                           | neurotransmitter transport                                                                                                                                                                                                                     | 5.3493e-11       | 5.5793e-8  | 4.1234          | 6.7797e-7              | 4.1856          | 23                 |
|                           | transmission of nerve impulse                                                                                                                                                                                                                  | 8.8821e-10       | 5.7900e-7  | 2.0635          | 7.5431e-15             | 3.2080          | 69                 |
|                           | synaptic transmission                                                                                                                                                                                                                          | 1.3571e-9        | 7.8638e-7  | 2.1587          | 4.3188e-14             | 3.3442          | 61                 |
|                           | potassium ion transport                                                                                                                                                                                                                        | 4.1852e-8        | 1.8188e-5  | 2.3352          | 6.1261e-10             | 3.5413          | 40                 |
|                           | calcium ion transport                                                                                                                                                                                                                          | 4.6190e-8        | 1.8529e-5  | 2.7238          | 6.3506e-5              | 3.0148          | 26                 |
|                           | monovalent inorganic cation transport                                                                                                                                                                                                          | 9.8806e-8        | 3.4351e-5  | 2.0042          | 2.9855e-7              | 2.4183          | 55                 |
|                           | cellular ion homeostasis                                                                                                                                                                                                                       | 1.3864e-7        | 4.2993e-5  | 2.0746          | 0.0004                 | 2.1041          | 44                 |
|                           | cellular chemical homeostasis                                                                                                                                                                                                                  | 1.5008e-7        | 4.3480e-5  | 2.0559          | 0.0003                 | 2.1133          | 45                 |
| GO Cellular Component     | synapse                                                                                                                                                                                                                                        | 6.8636e-13       | 1.1449e-10 | 2.2089          | 3.2465e-20             | 3.5735          | 75                 |
|                           | ion channel complex                                                                                                                                                                                                                            | 1.5078e-10       | 2.0959e-8  | 2.8446          | 4.2744e-11             | 3.7436          | 38                 |
|                           | cation channel complex                                                                                                                                                                                                                         | 2.0295e-9        | 2.4180e-7  | 2.7595          | 4.5533e-10             | 3.7754          | 34                 |
|                           | synapse part                                                                                                                                                                                                                                   | 7.5788e-6        | 6.3207e-6  | 2.0834          | 1.6318e-14             | 3.6919          | 51                 |
|                           | synaptic vesicle                                                                                                                                                                                                                               | 3.1314e-7        | 1.8654e-5  | 3.7002          | 2.2917e-6              | 4.1929          | 16                 |
|                           | voltage-gated calcium channel complex                                                                                                                                                                                                          | 4.1361e-7        | 2.2997e-5  | 5.5900          | 0.0050                 | 4.7646          | 8                  |
|                           | calcium channel complex                                                                                                                                                                                                                        | 7.8099e-6        | 0.0004     | 4.3143          | 0.0131                 | 4.1929          | 8                  |
|                           | clathrin-coated vesicle                                                                                                                                                                                                                        | 1.9303e-5        | 0.0039     | 2.6331          | 0.0050                 | 2.6235          | 18                 |
|                           | coated vesicle                                                                                                                                                                                                                                 | 3.7666e-5        | 0.0015     | 2.4718          | 0.0146                 | 2.5267          | 19                 |
|                           | voltage-gated potassium channel complex                                                                                                                                                                                                        | 3.8177e-5        | 0.0014     | 2.3345          | 2.1491e-7              | 3.6623          | 24                 |
| Mouse Phenotype           | abnormal synaptic transmission                                                                                                                                                                                                                 | 4.6652e-31       | 2.8132e-27 | 2.6653          | 1.0292e-36             | 3.9078          | 119                |
|                           | abnormal CNS synaptic transmission                                                                                                                                                                                                             | 2.0201e-27       | 5.8991e-24 | 2.6894          | 3.2614e-32             | 3.9776          | 102                |
|                           | abnormal miniature excitatory postsynaptic currents                                                                                                                                                                                            | 2.2017e-15       | 3.1320e-12 | 6.5954          | 3.4255e-9              | 6.9608          | 17                 |
|                           | abnormal nervous system electrophysiology                                                                                                                                                                                                      | 8.4892e-14       | 8.1795e-11 | 2.7178          | 1.6394e-14             | 3.7436          | 52                 |
|                           | abnormal inhibitory postsynaptic currents                                                                                                                                                                                                      | 7.2252e-13       | 5.2211e-10 | 4.4781          | 1.2073e-12             | 6.4229          | 25                 |
|                           | abnormal excitatory postsynaptic currents                                                                                                                                                                                                      | 7.2783e-13       | 4.6751e-10 | 3.6642          | 2.3580e-10             | 4.9135          | 27                 |
|                           | abnormal neurotransmitter level                                                                                                                                                                                                                | 3.6408e-12       | 2.1048e-9  | 4.0176          | 7.4554e-8              | 4.5756          | 22                 |
|                           | abnormal touch/ nociception                                                                                                                                                                                                                    | 5.7838e-12       | 3.0397e-9  | 2.7504          | 4.3928e-9              | 3.2154          | 40                 |
|                           | seizures                                                                                                                                                                                                                                       | 3.4626e-11       | 1.5396e-8  | 2.2757          | 4.2019e-13             | 3.1554          | 59                 |
|                           | abnormal neurotransmitter secretion                                                                                                                                                                                                            | 9.9134e-11       | 4.0935e-8  | 4.0211          | 1.5953e-5              | 4.2028          | 17                 |
| PANTHER Pathway           | Ionotropic glutamate receptor pathway                                                                                                                                                                                                          | 4.1905e-6        | 0.0006     | 3.0509          | 5.2355e-8              | 5.6155          | 18                 |
|                           | Opioid proenkephalin pathway                                                                                                                                                                                                                   | 5.1855e-6        | 0.0004     | 4.4811          | 0.0120                 | 3.8851          | 9                  |
|                           | Endogenous cannabinoid signaling                                                                                                                                                                                                               | 5.3600e-6        | 0.0003     | 5.7536          | 0.0099                 | 4.6273          | 7                  |
|                           | 5-HT4 type receptor mediated signaling pathway                                                                                                                                                                                                 | 3.0659e-5        | 0.0011     | 4.3657          | 0.0216                 | 3.4941          | 8                  |
|                           | Opioid proenkephalin pathway                                                                                                                                                                                                                   | 6.6826e-5        | 0.0022     | 3.9072          | 0.0227                 | 3.3814          | 9                  |
|                           | Thyrotropin-releasing hormone receptor signaling pathway                                                                                                                                                                                       | 0.0003           | 0.0095     | 2.6365          | 0.0227                 | 2.6261          | 11                 |
|                           | Corticotropin releasing factor receptor signaling pathway                                                                                                                                                                                      | 0.0004           | 0.0070     | 4.2148          | 0.0165                 | 3.7436          | 8                  |
|                           | Dopamine receptor mediated signaling pathway                                                                                                                                                                                                   | 0.0006           | 0.0093     | 2.6369          | 0.0135                 | 2.9117          | 12                 |
|                           | Metabotropic glutamate receptor group III pathway                                                                                                                                                                                              | 0.0008           | 0.0126     | 2.1199          | 4.8674e-5              | 3.7436          | 18                 |
|                           | Adrenaline and noradrenaline biosynthesis                                                                                                                                                                                                      | 0.0019           | 0.0233     | 3.6653          | 0.0220                 | 3.8216          | 7                  |
| Predicted Promoter Motifs | Genes with promoter regions [-2kb,2kb] around transcription start site containing the motif TTGAGCACCACGGACAGMGCC which matches annotation for REST: RE1-silencing transcription factor                                                        | 2.3531e-52       | 1.4472e-59 | 9.0171          | 7.0169e-59             | 10.6725         | 78                 |
|                           | Genes with promoter regions [-2kb,2kb] around transcription start site containing motif CAGNVMKNNNGAC. Motif does not match any known transcription factor                                                                                     | 1.0441e-39       | 3.2106e-37 | 7.7188          | 1.4051e-39             | 8.6324          | 56                 |
|                           | Genes with promoter regions [-2kb,2kb] around transcription start site containing the motif NNGGGCCGGGNN which matches annotation for SP1: Sp1 transcription factor                                                                            | 3.1347e-6        | 6.4262e-6  | 2.3571          | 0.0055                 | 1.6183          | 34                 |
|                           | Genes with promoter regions [-2kb,2kb] around transcription start site containing the motif GCGSTCWR which matches annotation for ITCAL: integrin, alpha L (antigen CD11A (p180), lymphocyte function-associated antigen 1, alpha polypeptide) | 2.4746e-7        | 3.6048e-6  | 2.2639          | 0.0031                 | 1.9038          | 34                 |
|                           | Genes with promoter regions [-2kb,2kb] around transcription start site containing the motif NNGGGCCGGGYN which matches annotation for SP1: Sp1 transcription factor                                                                            | 2.0156e-6        | 0.0002     | 2.1173          | 0.0196                 | 1.6647          | 31                 |
|                           | Genes with promoter regions [-2kb,2kb] around transcription start site containing the motif GSGCCGR which matches annotation for ZFP161: zinc finger protein 161 homolog (mouse)                                                               | 4.0319e-6        | 0.0003     | 2.0112          | 0.0043                 | 1.6972          | 32                 |
|                           | Genes with promoter regions [-2kb,2kb] around transcription start site containing motif YRCCAKNNNGCC. Motif does not match any known transcription factor                                                                                      | 0.0003           | 0.0108     | 2.6195          | 0.0106                 | 2.5423          | 13                 |
| InterPro                  | Ion transport                                                                                                                                                                                                                                  | 7.4080e-8        | 0.0005     | 2.5623          | 9.4341e-10             | 4.2428          | 34                 |
|                           | Extracellular ligand-binding receptor                                                                                                                                                                                                          | 3.1935e-5        | 0.0351     | 2.6108          | 6.4066e-7              | 6.1874          | 17                 |
|                           | Potassium channel, voltage-dependent, P/Q/K/ERG                                                                                                                                                                                                | 8.6197e-5        | 0.0437     | 4.2245          | 8.1606e-7              | 10.9189         | 10                 |
| HGNC Gene Families        | CACN                                                                                                                                                                                                                                           | 1.8861e-9        | 4.4890e-7  | 6.2309          | 0.0006                 | 5.2411          | 10                 |
|                           | KCN                                                                                                                                                                                                                                            | 7.0177e-5        | 0.0056     | 2.1243          | 5.6682e-8              | 3.9750          | 27                 |
|                           | KV                                                                                                                                                                                                                                             | 0.0007           | 0.0325     | 2.4263          | 1.0080e-6              | 5.3755          | 16                 |
|                           |                                                                                                                                                                                                                                                |                  |            |                 |                        |                 |                    |

**Supplementary Table 40:** Enrichment for regions bound by GABP in human Jurkat cells. **(a)** The top ten proximal binding gene-based enrichments (reproduced from ref. 19). **(b)** GREAT *cis*-regulatory element enrichments for all regions bound by GABP.

**a Gene-based GO Enrichments of GABP Promoter Binding Peaks**

| Term               | p-value                 |
|--------------------|-------------------------|
| nucleus            | $1.21 \times 10^{-240}$ |
| protein binding    | $1.87 \times 10^{-120}$ |
| transcription      | $2.03 \times 10^{-80}$  |
| nucleotide binding | $1.13 \times 10^{-77}$  |
| metal ion binding  | $9.06 \times 10^{-73}$  |
| RNA binding        | $4.19 \times 10^{-68}$  |
| intracellular      | $1.60 \times 10^{-67}$  |
| DNA binding        | $2.35 \times 10^{-65}$  |
| zinc ion binding   | $5.12 \times 10^{-64}$  |
| mitochondrion      | $2.98 \times 10^{-62}$  |

**b GREAT Enrichments of GABP Binding Peaks in Human Jurkat Cells**

| Ontology                     | Term                                                                             | Binomial Results |             |                 | Hypergeometric Results |                 |                    |
|------------------------------|----------------------------------------------------------------------------------|------------------|-------------|-----------------|------------------------|-----------------|--------------------|
|                              |                                                                                  | Raw P-Value      | FDR Q-Val   | Fold Enrichment | FDR Q-Val              | Fold Enrichment | Observed Gene Hits |
| GO Molecular Function        | structural constituent of ribosome                                               | 4.5489e-25       | 1.2737e-21  | 3.3100          | 1.2151e-22             | 2.7230          | 93                 |
|                              | translation regulator activity                                                   | 2.9929e-10       | 2.0950e-7   | 2.4762          | 1.7722e-7              | 2.1309          | 57                 |
|                              | nuclease activity                                                                | 2.7452e-9        | 1.5373e-6   | 2.2633          | 0.0107                 | 1.5666          | 55                 |
|                              | translation factor activity, nucleic acid binding                                | 1.7071e-8        | 6.8284e-6   | 2.3911          | 2.4775e-7              | 2.2271          | 50                 |
|                              | RNA splicing factor activity, transesterification mechanism                      | 7.4957e-8        | 2.6235e-5   | 4.8808          | 3.1700e-5              | 3.1403          | 18                 |
|                              | unfolded protein binding                                                         | 3.0537e-7        | 9.5004e-5   | 2.2564          | 0.0007                 | 1.8472          | 45                 |
|                              | transcription elongation regulator activity                                      | 5.4679e-7        | 0.0002      | 5.0761          | 0.0321                 | 2.5122          | 12                 |
|                              | DNA-directed RNA polymerase activity                                             | 7.6845e-7        | 0.0002      | 3.3933          | 0.0176                 | 2.0935          | 20                 |
|                              | retinoid-X receptor activity                                                     | 1.0121e-6        | 0.0002      | 7.8129          | 0.0434                 | 3.0451          | 8                  |
|                              | translation initiation factor activity                                           | 1.4156e-6        | 0.0003      | 2.6428          | 0.0019                 | 2.0935          | 28                 |
| GO Biological Process        | RNA processing                                                                   | 6.6273e-37       | 4.9373e-34  | 2.2316          | 4.9809e-41             | 2.1813          | 261                |
|                              | translation                                                                      | 8.2428e-34       | 4.7762e-31  | 2.7888          | 2.9650e-32             | 2.4179          | 164                |
|                              | nuclear mRNA splicing, via spliceosome                                           | 3.1698e-26       | 1.5028e-23  | 3.4054          | 2.0656e-18             | 2.5065          | 88                 |
|                              | RNA splicing                                                                     | 2.4400e-25       | 9.7880e-23  | 2.3894          | 5.7152e-27             | 2.3143          | 152                |
|                              | ribonucleoprotein complex biogenesis                                             | 5.0060e-23       | 1.8647e-20  | 2.8001          | 8.9944e-24             | 2.5496          | 109                |
|                              | ncRNA metabolic process                                                          | 1.1075e-22       | 3.8505e-20  | 2.7865          | 4.6052e-18             | 2.2742          | 107                |
|                              | translational elongation                                                         | 1.1143e-21       | 3.2285e-19  | 3.9453          | 8.6555e-17             | 2.7771          | 65                 |
|                              | mRNA processing                                                                  | 1.5375e-18       | 3.8182e-16  | 2.0388          | 1.3605e-22             | 2.1422          | 154                |
|                              | ribosome biogenesis                                                              | 3.3727e-18       | 7.9947e-16  | 3.1998          | 2.0573e-15             | 2.6218          | 67                 |
|                              | ncRNA processing                                                                 | 8.5011e-18       | 1.9275e-15  | 2.7329          | 6.7274e-14             | 2.2545          | 84                 |
| GO Cellular Component        | ribonucleoprotein complex                                                        | 2.3165e-59       | 1.9320e-56  | 3.0144          | 8.3195e-57             | 2.5342          | 253                |
|                              | ribosome                                                                         | 1.4526e-29       | 1.5143e-27  | 3.2160          | 6.9804e-27             | 2.5836          | 116                |
|                              | spliceosome                                                                      | 2.0579e-23       | 1.7163e-21  | 3.1654          | 2.6336e-21             | 2.6673          | 86                 |
|                              | ribosomal subunit                                                                | 2.3524e-20       | 1.4014e-18  | 3.4328          | 1.3985e-17             | 2.6889          | 70                 |
|                              | cytosolic ribosome                                                               | 1.3981e-14       | 5.3001e-13  | 3.4075          | 6.6730e-14             | 2.8291          | 50                 |
|                              | small nuclear ribonucleoprotein complex                                          | 4.6792e-14       | 1.6967e-12  | 6.6490          | 3.1038e-8              | 3.4892          | 20                 |
|                              | large ribosomal subunit                                                          | 4.0734e-13       | 1.4155e-11  | 3.6805          | 3.0246e-13             | 3.1015          | 40                 |
|                              | proteasome complex                                                               | 6.5892e-13       | 2.1962e-11  | 3.9146          | 1.4457e-9              | 2.8786          | 33                 |
|                              | cytosolic part                                                                   | 3.0242e-12       | 9.7005e-11  | 2.5147          | 6.6710e-10             | 2.1257          | 66                 |
|                              | mitochondrial membrane part                                                      | 7.6827e-12       | 2.2863e-10  | 2.7469          | 7.8343e-6              | 1.9066          | 51                 |
| Pathway Commons              | Transcription                                                                    | 1.0524e-65       | 1.3187e-62  | 3.6609          | 3.3267e-60             | 2.6438          | 209                |
|                              | Elongation of Intron-Containing Transcripts and co-transcriptional mRNA splicing | 2.3747e-65       | 1.4877e-62  | 4.2681          | 1.7373e-44             | 2.7038          | 175                |
|                              | Elongation and Processing of Capped Transcripts                                  | 2.3747e-65       | 1.4877e-62  | 4.2681          | 1.7373e-44             | 2.7038          | 175                |
|                              | mRNA Processing                                                                  | 8.0356e-65       | 2.5172e-62  | 4.1802          | 3.1846e-45             | 2.7200          | 178                |
|                              | mRNA Capping                                                                     | 8.1633e-65       | 2.0457e-62  | 4.1981          | 2.6755e-45             | 2.7147          | 177                |
|                              | RNA Pol II CTD phosphorylation and interaction with CE                           | 8.1633e-65       | 2.0457e-62  | 4.1981          | 2.6755e-45             | 2.7147          | 177                |
|                              | RNA Polymerase II Transcription Initiation And Promoter Clearance                | 1.0264e-64       | 1.8373e-62  | 4.0355          | 5.0973e-45             | 2.6658          | 184                |
|                              | Formation and Maturation of mRNA Transcript                                      | 1.0264e-64       | 1.8373e-62  | 4.0355          | 5.0973e-45             | 2.6658          | 184                |
|                              | RNA Polymerase II Promoter Escape                                                | 1.0264e-64       | 1.8373e-62  | 4.0355          | 5.0973e-45             | 2.6658          | 184                |
|                              | RNA Polymerase II Transcription Initiation                                       | 1.0264e-64       | 1.8373e-62  | 4.0355          | 5.0973e-45             | 2.6658          | 184                |
| MSigDB Pathway               | Genes involved in mRNA splicing                                                  | 1.9443e-16       | 1.3727e-13  | 4.4098          | 6.8199e-10             | 2.8412          | 38                 |
|                              | RIBOSOMAL_PROTEINS                                                               | 1.5552e-14       | 5.4897e-12  | 2.9125          | 2.4091e-14             | 2.6271          | 64                 |
|                              | Genes involved in ribosome                                                       | 4.0239e-14       | 9.4697e-12  | 3.3626          | 3.7411e-14             | 2.9807          | 50                 |
|                              | MRNA_PROCESSING_REACTOME                                                         | 1.0913e-10       | 1.5408e-8   | 2.2348          | 3.8779e-12             | 2.3774          | 67                 |
|                              | Genes involved in mRNA processing                                                | 5.2325e-8        | 4.6177e-6   | 3.0845          | 8.3463e-6              | 2.5486          | 28                 |
|                              | Genes involved in proteasome                                                     | 5.9977e-8        | 4.7049e-6   | 4.6941          | 0.0045                 | 2.6645          | 14                 |
|                              | Genes involved in oxidative phosphorylation                                      | 7.4103e-8        | 5.2317e-6   | 2.1875          | 2.2890e-5              | 1.9099          | 52                 |
|                              | Genes involved in electron transport                                             | 2.0313e-7        | 1.3038e-5   | 2.2461          | 0.0001                 | 1.9070          | 46                 |
|                              | RNA_TRANSCRIPTION_REACTOME                                                       | 9.9760e-7        | 5.8692e-5   | 3.4532          | 0.0349                 | 1.9888          | 19                 |
|                              | Genes involved in glycosylphosphatidylinositol(GPI)-anchor biosynthesis          | 8.1779e-6        | 0.0004      | 3.8295          | 0.0304                 | 2.3666          | 13                 |
| Transcription Factor Targets | Targets of ETS1, identified by ChIP-chip in Jurkat T-cells.                      | 1.8169e-218      | 3.4521e-217 | 3.2266          | 3.2230e-212            | 2.7616          | 744                |
|                              | Targets of YY1 identified by ChIP-chip.                                          | 3.1323e-74       | 1.9838e-73  | 2.7464          | 2.5395e-56             | 2.1831          | 341                |

**Supplementary Table 41: “Gene-based GREAT” enrichments of all genes that possess an GABP binding peak within 2 kb of its transcription start site. Shown are the top ten hypergeometric enriched terms at a false discovery rate of 0.05.**

| Ontology              | Term                                                                               | Hypergeometric Results |             |                    |
|-----------------------|------------------------------------------------------------------------------------|------------------------|-------------|--------------------|
|                       | Name                                                                               | Raw P-Value            | FDR Q-Val   | Observed Gene Hits |
| GO Molecular Function | nucleic acid binding                                                               | 1.6055e-56             | 4.7194e-53  | 1067               |
|                       | RNA binding                                                                        | 4.3765e-46             | 6.1271e-43  | 317                |
|                       | structural constituent of ribosome                                                 | 4.6834e-32             | 4.3712e-29  | 100                |
|                       | DNA binding                                                                        | 3.7326e-16             | 2.6128e-13  | 670                |
|                       | nucleotide binding                                                                 | 1.0886e-15             | 6.0962e-13  | 608                |
|                       | binding                                                                            | 1.6887e-13             | 7.9271e-11  | 2966               |
|                       | catalytic activity                                                                 | 2.4195e-13             | 9.6785e-11  | 1331               |
|                       | protein binding                                                                    | 2.4669e-13             | 8.6341e-11  | 1912               |
|                       | zinc ion binding                                                                   | 4.9667e-13             | 1.3585e-10  | 645                |
|                       | hydrolase activity, acting on acid anhydrides, in phosphorus-containing anhydrides | 4.7127e-11             | 1.3196e-8   | 237                |
| GO Biological Process | biopolymer metabolic process                                                       | 2.7091e-125            | 1.4128e-121 | 1749               |
|                       | cellular biopolymer metabolic process                                              | 3.3099e-125            | 0.0309e-122 | 1740               |
|                       | cellular macromolecule metabolic process                                           | 3.5955e-121            | 6.2503e-118 | 1754               |
|                       | macromolecule metabolic process                                                    | 1.5289e-119            | 1.9930e-116 | 1762               |
|                       | gene expression                                                                    | 8.4272e-110            | 8.7895e-107 | 994                |
|                       | nucleobase, nucleoside, nucleotide and nucleic acid metabolic process              | 3.2892e-103            | 2.9500e-100 | 1114               |
|                       | cellular metabolic process                                                         | 1.2047e-100            | 8.9750e-96  | 2039               |
|                       | primary metabolic process                                                          | 0.4220e-92             | 5.4901e-09  | 1912               |
|                       | metabolic process                                                                  | 9.3241e-87             | 5.4028e-84  | 2130               |
|                       | RNA metabolic process                                                              | 2.1869e-82             | 1.1405e-79  | 442                |
| GO Cellular Component | intracellular                                                                      | 1.1748e-141            | 9.7978e-139 | 3135               |
|                       | intracellular membrane-bounded organelle                                           | 7.0432e-138            | 2.9370e-135 | 2467               |
|                       | membrane-bounded organelle                                                         | 1.3493e-137            | 3.7510e-135 | 2467               |
|                       | intracellular part                                                                 | 4.3790e-136            | 9.1303e-134 | 3033               |
|                       | intracellular organelle                                                            | 1.5623e-125            | 2.5892e-123 | 2648               |
|                       | organelle                                                                          | 3.4694e-125            | 4.8224e-123 | 2648               |
|                       | nucleus                                                                            | 5.3472e-90             | 6.3708e-88  | 1669               |
|                       | ribonucleoprotein complex                                                          | 2.5339e-77             | 2.6416e-75  | 275                |
|                       | intracellular organelle part                                                       | 1.8714e-65             | 1.7342e-63  | 1321               |
|                       | organelle part                                                                     | 2.7699e-65             | 2.3101e-63  | 1325               |
| Mouse Phenotype       | abnormal cell content/ morphology                                                  | 0.9635e-9              | 5.1016e-5   | 97                 |
|                       | embryonic lethality                                                                | 1.0011e-6              | 0.0029      | 313                |
|                       | abnormal inner cell mass                                                           | 1.0654e-6              | 0.0036      | 35                 |
|                       | embryonic lethality before implantation                                            | 3.2302e-6              | 0.0047      | 48                 |
|                       | decreased cell proliferation                                                       | 5.1903e-6              | 0.0060      | 73                 |
|                       | prenatal lethality                                                                 | 7.7317e-6              | 0.0074      | 406                |
|                       | embryonic lethality before somite formation                                        | 8.1200e-6              | 0.0067      | 86                 |
|                       | cellular phenotype                                                                 | 1.0200e-5              | 0.0074      | 303                |
|                       | abnormal cell physiology                                                           | 1.9253e-5              | 0.0124      | 275                |
|                       | abnormal blastocyst morphology                                                     | 3.3417e-5              | 0.0193      | 39                 |

| Ontology                                               | Term                                                                                                                                                        | Hypergeometric Results |             |                    |
|--------------------------------------------------------|-------------------------------------------------------------------------------------------------------------------------------------------------------------|------------------------|-------------|--------------------|
|                                                        | Name                                                                                                                                                        | Raw P-Value            | FDR Q-Val   | Observed Gene Hits |
| PANTHER Pathway                                        | General transcription regulation                                                                                                                            | 9.3231e-5              | 0.0140      | 17                 |
|                                                        | Transcription regulation by bZIP transcription factor                                                                                                       | 0.0001                 | 0.0079      | 21                 |
|                                                        | mRNA splicing                                                                                                                                               | 0.0002                 | 0.0064      | 6                  |
|                                                        | Tetrahydrofolate biosynthesis                                                                                                                               | 0.0007                 | 0.0266      | 5                  |
|                                                        | Parkinson disease                                                                                                                                           | 0.0015                 | 0.0451      | 32                 |
|                                                        | General transcription by RNA polymerase I                                                                                                                   | 0.0018                 | 0.0460      | 8                  |
|                                                        | Gene Expression                                                                                                                                             | 2.2030e-75             | 2.7614e-72  | 245                |
|                                                        | Transcription                                                                                                                                               | 2.7287e-75             | 1.7095e-72  | 234                |
|                                                        | RNA Polymerase II Transcription Initiation And Promoter Clearance                                                                                           | 2.1512e-66             | 8.9849e-64  | 205                |
|                                                        | Formation and Maturation of mRNA Transcript                                                                                                                 | 2.1512e-66             | 8.9849e-64  | 205                |
| RNA Polymerase II Promoter Escape                      | 2.1512e-66                                                                                                                                                  | 8.9849e-64             | 205         |                    |
| RNA Polymerase II Transcription Initiation             | 2.1512e-66                                                                                                                                                  | 8.9849e-64             | 205         |                    |
| RNA Polymerase II Transcription Pre-Initiation         | 2.1512e-66                                                                                                                                                  | 8.9849e-64             | 205         |                    |
| RNA Polymerase II Transcription                        | 2.1512e-66                                                                                                                                                  | 8.9849e-64             | 205         |                    |
| mRNA Capping                                           | 4.6077e-63                                                                                                                                                  | 6.4150e-61             | 194         |                    |
| RNA Pol II CTD phosphorylation and interaction with CE | 4.6077e-63                                                                                                                                                  | 6.4150e-61             | 194         |                    |
| MSigDB Pathway                                         | MRNA_PROCESSING_REACTOME                                                                                                                                    | 7.5237e-23             | 5.3117e-20  | 78                 |
|                                                        | RIBOSOMAL_PROTEINS                                                                                                                                          | 2.0811e-20             | 7.3463e-18  | 68                 |
|                                                        | Genes involved in ribosome                                                                                                                                  | 3.3684e-20             | 7.9034e-18  | 63                 |
|                                                        | Genes involved in mRNA splicing                                                                                                                             | 4.6592e-15             | 8.2235e-13  | 41                 |
|                                                        | Mitochondrial genes                                                                                                                                         | 2.9809e-13             | 3.7572e-11  | 172                |
|                                                        | FGC related genes                                                                                                                                           | 2.9192e-13             | 3.4349e-11  | 163                |
|                                                        | Mitochondrial genes                                                                                                                                         | 7.0362e-13             | 7.0965e-11  | 164                |
|                                                        | Genes involved in mRNA processing                                                                                                                           | 5.1617e-10             | 2.7902e-8   | 51                 |
|                                                        | Genes involved in electron transport                                                                                                                        | 3.1462e-9              | 2.4690e-7   | 51                 |
|                                                        | RNA_TRANSCRIPTION_REACTOME                                                                                                                                  | 4.2302e-9              | 2.9865e-7   | 27                 |
| Transcription Factor Targets                           | Targets of ETS1, identified by ChIP-chip in Jurkat T-cells.                                                                                                 | 5.3746e-299            | 1.0212e-297 | 928                |
|                                                        | Targets of CREB, identified by ChIP-chip in HEK293T cells in three different time points after forskolin stimulation.                                       | 3.3370e-260            | 3.1701e-249 | 1201               |
|                                                        | Targets of YY1 identified by ChIP-chip.                                                                                                                     | 6.6583e-86             | 5.4839e-85  | 383                |
|                                                        | Targets of HNF4alpha, identified by ChIP-chip in hepatocytes.                                                                                               | 1.0137e-60             | 4.0149e-50  | 573                |
|                                                        | Targets of NRF1, identified by ChIP-chip in quiescent T98G cells.                                                                                           | 5.6202e-34             | 2.1357e-33  | 268                |
|                                                        | Targets of estrogen receptor alpha, identified by ChIP-DSL in MCF-7 cells.                                                                                  | 1.2541e-19             | 3.9713e-19  | 191                |
|                                                        | Genes that are bound by both E2F4 and p130 in three different growth arrest conditions, identified by ChIP-chip in T98G and U2OS cells under growth arrest. | 5.5259e-19             | 1.4999e-18  | 100                |
|                                                        | Targets of Nanog, identified by ChIP-chip in embryonic stem cells.                                                                                          | 1.5190e-14             | 3.6077e-14  | 250                |
|                                                        | Genes whose expression peaks periodically in the G1/S cell cycle phase.                                                                                     | 2.6230e-10             | 5.5374e-10  | 100                |
|                                                        | Genes bound by one of the five NF-kB subunits in U937 cells before or 1 hour after lipopolysaccharide stimulation.                                          | 1.0425e-6              | 1.9809e-6   | 98                 |

**Supplementary Table 42:** GREAT enrichments of GABP using the *basal plus extension* association rule with a maximum a basal regulatory region extending 5 kb upstream and 1 kb downstream of the transcription start site and extension of 50 kb. Shown are the top ten binomial enriched terms at a false discovery rate of 0.05 with a fold enrichment of at least two that are also significant by the hypergeometric test, using the highest-scoring GABP peaks anywhere in the genome (QuEST score > 1; n = 3,585).

| Ontology                                                              | Term                                                                                                                                                        | Binomial Results                                                                                                      |             |                 | Hypergeometric Results |                 |                    |      |
|-----------------------------------------------------------------------|-------------------------------------------------------------------------------------------------------------------------------------------------------------|-----------------------------------------------------------------------------------------------------------------------|-------------|-----------------|------------------------|-----------------|--------------------|------|
|                                                                       | Name                                                                                                                                                        | Raw P-Value                                                                                                           | FDR Q-Val   | Fold Enrichment | FDR Q-Val              | Fold Enrichment | Observed Gene Hits |      |
| GO Molecular Function                                                 | nucleic acid binding                                                                                                                                        | 0                                                                                                                     | 0           | 4.0909          | 5.0778e-43             | 1.4722          | 943                |      |
|                                                                       | protein binding                                                                                                                                             | 0                                                                                                                     | 0           | 2.9122          | 1.6051e-9              | 1.1193          | 1708               |      |
|                                                                       | binding                                                                                                                                                     | 0                                                                                                                     | 0           | 2.7646          | 2.5905e-8              | 1.0636          | 2625               |      |
|                                                                       | catalytic activity                                                                                                                                          | 3.1573e-269                                                                                                           | 2.2101e-266 | 2.8910          | 5.6031e-5              | 1.1178          | 1143               |      |
|                                                                       | DNA binding                                                                                                                                                 | 2.4794e-190                                                                                                           | 1.3885e-187 | 3.6411          | 4.3195e-11             | 1.2960          | 596                |      |
|                                                                       | transition metal ion binding                                                                                                                                | 1.5612e-174                                                                                                           | 7.2855e-172 | 3.2149          | 5.8631e-7              | 1.2094          | 662                |      |
|                                                                       | zinc ion binding                                                                                                                                            | 1.0497e-169                                                                                                           | 4.1989e-167 | 3.4600          | 1.3524e-9              | 1.2773          | 581                |      |
|                                                                       | nucleotide binding                                                                                                                                          | 4.5295e-126                                                                                                           | 1.1530e-123 | 3.1341          | 3.3032e-5              | 1.2137          | 501                |      |
|                                                                       | RNA binding                                                                                                                                                 | 2.7196e-125                                                                                                           | 6.3456e-123 | 5.4805          | 5.4821e-30             | 1.9679          | 269                |      |
|                                                                       | purine nucleotide binding                                                                                                                                   | 1.5810e-97                                                                                                            | 3.1620e-95  | 3.0421          | 0.0047                 | 1.1791          | 408                |      |
|                                                                       | GO Biological Process                                                                                                                                       | bicopolymer metabolic process                                                                                         | 0           | 0               | 4.0340                 | 2.1096e-92      | 1.5065             | 1526 |
|                                                                       |                                                                                                                                                             | cellular bicopolymer metabolic process                                                                                | 0           | 0               | 4.0408                 | 2.7142e-92      | 1.5076             | 1518 |
|                                                                       |                                                                                                                                                             | cellular macromolecule metabolic process                                                                              | 0           | 0               | 4.0017                 | 4.1312e-89      | 1.4914             | 1530 |
| macromolecule metabolic process                                       |                                                                                                                                                             | 0                                                                                                                     | 0           | 3.9819          | 2.9677e-88             | 1.4852          | 1538               |      |
| gene expression                                                       |                                                                                                                                                             | 0                                                                                                                     | 0           | 5.0169          | 1.3366e-84             | 1.7889          | 871                |      |
| nucleobase, nucleoside, nucleotide and nucleic acid metabolic process |                                                                                                                                                             | 0                                                                                                                     | 0           | 4.5240          | 1.1987e-73             | 1.6573          | 962                |      |
| cellular metabolic process                                            |                                                                                                                                                             | 0                                                                                                                     | 0           | 3.6113          | 6.9341e-70             | 1.3594          | 1772               |      |
| primary metabolic process                                             |                                                                                                                                                             | 0                                                                                                                     | 0           | 3.5896          | 7.1651e-63             | 1.3483          | 1712               |      |
| metabolic process                                                     |                                                                                                                                                             | 0                                                                                                                     | 0           | 3.4776          | 3.1213e-59             | 1.3081          | 1853               |      |
| cellular process                                                      |                                                                                                                                                             | 0                                                                                                                     | 0           | 2.8221          | 6.3702e-8              | 1.0675          | 2436               |      |
| GO Cellular Component                                                 |                                                                                                                                                             | intracellular membrane-bounded organelle                                                                              | 0           | 0               | 3.5994                 | 3.8315e-100     | 1.3616             | 2155 |
|                                                                       |                                                                                                                                                             | membrane-bounded organelle                                                                                            | 0           | 0               | 3.5979                 | 3.2193e-100     | 1.3610             | 2155 |
|                                                                       |                                                                                                                                                             | intracellular                                                                                                         | 0           | 0               | 3.2754                 | 1.7053e-99      | 1.2473             | 2742 |
|                                                                       | intracellular part                                                                                                                                          | 0                                                                                                                     | 0           | 3.2966          | 2.1265e-93             | 1.2533          | 2645               |      |
|                                                                       | intracellular organelle                                                                                                                                     | 0                                                                                                                     | 0           | 3.4639          | 3.6595e-89             | 1.3034          | 2311               |      |
|                                                                       | organelle                                                                                                                                                   | 0                                                                                                                     | 0           | 3.4624          | 5.7550e-89             | 1.3028          | 2311               |      |
|                                                                       | nucleus                                                                                                                                                     | 0                                                                                                                     | 0           | 3.6242          | 2.3436e-70             | 1.4324          | 1471               |      |
|                                                                       | intracellular organelle part                                                                                                                                | 0                                                                                                                     | 0           | 3.9100          | 6.2587e-47             | 1.4141          | 1150               |      |
|                                                                       | organelle part                                                                                                                                              | 0                                                                                                                     | 0           | 3.9036          | 1.0801e-46             | 1.4115          | 1153               |      |
|                                                                       | cytoplasmic part                                                                                                                                            | 0                                                                                                                     | 0           | 3.5096          | 2.8658e-30             | 1.3126          | 1154               |      |
|                                                                       | Mouse Phenotype                                                                                                                                             | abnormal cell content/ morphology                                                                                     | 4.7188e-28  | 1.4357e-25      | 4.3937                 | 0.0009          | 1.7351             | 77   |
|                                                                       |                                                                                                                                                             | abnormal nucleus morphology                                                                                           | 7.9129e-17  | 7.5241e-15      | 5.4661                 | 0.0216          | 2.0560             | 34   |
|                                                                       |                                                                                                                                                             | abnormal inner cell mass                                                                                              | 1.2982e-15  | 1.1201e-13      | 5.6211                 | 0.0253          | 2.0858             | 31   |
| Pathway Commons                                                       | Transcription                                                                                                                                               | 1.0444e-144                                                                                                           | 1.3096e-141 | 9.3182          | 6.5253e-57             | 2.9587          | 205                |      |
|                                                                       | Gene Expression                                                                                                                                             | 1.3150e-143                                                                                                           | 8.2384e-141 | 8.8684          | 7.0113e-57             | 2.8798          | 214                |      |
|                                                                       | RNA Polymerase II Transcription Initiation And Promoter Clearance                                                                                           | 1.4482e-130                                                                                                           | 6.0485e-128 | 9.6388          | 1.7959e-51             | 2.9919          | 181                |      |
|                                                                       | Formation and Maturation of mRNA Transcript                                                                                                                 | 1.4482e-130                                                                                                           | 6.0485e-128 | 9.6388          | 1.7959e-51             | 2.9919          | 181                |      |
|                                                                       | RNA Polymerase II Promoter Escape                                                                                                                           | 1.4482e-130                                                                                                           | 6.0485e-128 | 9.6388          | 1.7959e-51             | 2.9919          | 181                |      |
|                                                                       | RNA Polymerase II Transcription Initiation                                                                                                                  | 1.4482e-130                                                                                                           | 6.0485e-128 | 9.6388          | 1.7959e-51             | 2.9919          | 181                |      |
|                                                                       | RNA Polymerase II Transcription Pre-Initiation                                                                                                              | 1.4482e-130                                                                                                           | 6.0485e-128 | 9.6388          | 1.7959e-51             | 2.9919          | 181                |      |
|                                                                       | RNA Polymerase II Transcription                                                                                                                             | 1.4482e-130                                                                                                           | 6.0485e-128 | 9.6388          | 1.7959e-51             | 2.9919          | 181                |      |
|                                                                       | mRNA Capping                                                                                                                                                | 2.4184e-126                                                                                                           | 3.3670e-124 | 9.8009          | 1.6931e-51             | 3.0448          | 174                |      |
|                                                                       | RNA Pol II CTD phosphorylation and interaction with CE                                                                                                      | 2.4184e-126                                                                                                           | 3.3670e-124 | 9.8009          | 1.6931e-51             | 3.0448          | 174                |      |
|                                                                       | MSigDB Pathway                                                                                                                                              | PGC related genes                                                                                                     | 1.1742e-60  | 8.2902e-58      | 4.8612                 | 2.4445e-9       | 1.6891             | 146  |
|                                                                       |                                                                                                                                                             | Mitochondrial genes                                                                                                   | 2.8360e-56  | 1.0011e-53      | 4.5873                 | 1.5542e-8       | 1.6139             | 150  |
|                                                                       |                                                                                                                                                             | Mitochondrial genes                                                                                                   | 1.2315e-55  | 2.6982e-53      | 4.6461                 | 1.1113e-7       | 1.5962             | 141  |
| RIBOSOMAL_PROTEINS                                                    |                                                                                                                                                             | 3.2406e-43                                                                                                            | 5.7196e-41  | 9.6198          | 1.2654e-16             | 2.9506          | 63                 |      |
| MRNA_PROCESSING_REACTOME                                              |                                                                                                                                                             | 1.0950e-39                                                                                                            | 1.5462e-37  | 7.5078          | 3.8894e-13             | 2.5910          | 64                 |      |
| Genes involved in ribosome                                            |                                                                                                                                                             | 4.4364e-39                                                                                                            | 5.2202e-37  | 11.7343         | 1.0293e-16             | 3.4123          | 50                 |      |
| Genes involved in mRNA splicing                                       |                                                                                                                                                             | 3.1605e-29                                                                                                            | 3.1876e-27  | 9.8927          | 6.6155e-11             | 3.1564          | 37                 |      |
| Genes involved in oxidative phosphorylation                           |                                                                                                                                                             | 1.2418e-26                                                                                                            | 1.0959e-24  | 6.6753          | 7.4546e-6              | 2.0534          | 49                 |      |
| Human CD34 enriched transcription factors                             |                                                                                                                                                             | 2.3174e-25                                                                                                            | 1.8179e-23  | 4.2628          | 0.0078                 | 1.5287          | 64                 |      |
| Genes involved in electron transport                                  |                                                                                                                                                             | 6.3985e-24                                                                                                            | 4.5173e-22  | 6.7021          | 1.6851e-5              | 2.0812          | 44                 |      |
| Transcription Factor Targets                                          |                                                                                                                                                             | Targets of ETS1, identified by ChIP-chip in Jurkat T-cells.                                                           | 0           | 0               | 9.6392                 | 6.4083e-241     | 3.0959             | 731  |
|                                                                       |                                                                                                                                                             | Targets of CREB, identified by ChIP-chip in HEK293T cells in three different time points after forskolin stimulation. | 0           | 0               | 6.1625                 | 1.2602e-185     | 2.2154             | 1030 |
|                                                                       |                                                                                                                                                             | Targets of YY1 identified by ChIP-chip                                                                                | 1.0698e-211 | 6.7755e-211     | 7.7756                 | 5.4823e-64      | 2.4032             | 329  |
|                                                                       | Targets of HNF4alpha, identified by ChIP-chip in hepatocytes.                                                                                               | 1.1979e-177                                                                                                           | 5.6902e-177 | 4.4366          | 1.1713e-32             | 1.5285          | 481                |      |
|                                                                       | Targets of NRF1, identified by ChIP-chip in quiescent T98G cells.                                                                                           | 1.3109e-94                                                                                                            | 4.9813e-94  | 4.8868          | 3.9021e-18             | 1.7035          | 230                |      |
|                                                                       | Targets of Nanog, identified by ChIP-chip in embryonic stem cells.                                                                                          | 2.4853e-57                                                                                                            | 7.6702e-57  | 3.6112          | 5.9997e-7              | 1.3807          | 200                |      |
|                                                                       | Targets of estrogen receptor alpha, identified by ChIP-DSL in MCF-7 cells.                                                                                  | 7.6028e-48                                                                                                            | 2.0636e-47  | 4.0712          | 4.5207e-10             | 1.8066          | 151                |      |
|                                                                       | Genes that are bound by both E2F4 and p130 in three different growth arrest conditions, identified by ChIP-chip in T98G and U2OS cells under growth arrest. | 6.1638e-45                                                                                                            | 1.4639e-44  | 6.2143          | 1.1301e-14             | 2.2225          | 87                 |      |
|                                                                       | Targets of Sox2, identified by ChIP-chip in embryonic stem cells.                                                                                           | 5.5284e-38                                                                                                            | 1.1671e-37  | 3.3727          | 0.0021                 | 1.2508          | 144                |      |
|                                                                       | Genes whose expression peaks periodically in the G1/S cell cycle phase.                                                                                     | 2.5639e-30                                                                                                            | 4.6714e-30  | 4.2710          | 9.8875e-5              | 1.5924          | 80                 |      |

**Supplementary Table 43:** GREAT enrichments of GABP using the *two nearest genes* association rule with a maximum extension of 1 Mb. Shown are the top ten binomial enriched terms at a false discovery rate of 0.05 with a fold enrichment of at least two that are also significant by the hypergeometric test, using the highest-scoring GABP peaks anywhere in the genome (QuEST score > 1; n = 3,585).

| Ontology                     | Term                                                                                                                                                        | Binomial Results |             |                 | Hypergeometric Results |                 |                    |
|------------------------------|-------------------------------------------------------------------------------------------------------------------------------------------------------------|------------------|-------------|-----------------|------------------------|-----------------|--------------------|
|                              | Name                                                                                                                                                        | Raw P-Value      | FDR Q-Val   | Fold Enrichment | FDR Q-Val              | Fold Enrichment | Observed Gene Hits |
| GO Molecular Function        | RNA binding                                                                                                                                                 | 2.8477e-39       | 2.6579e-36  | 2.0040          | 2.0193e-12             | 1.4125          | 327                |
|                              | structural constituent of ribosome                                                                                                                          | 1.8690e-37       | 1.3083e-34  | 3.9493          | 5.6407e-14             | 1.9725          | 100                |
|                              | translation regulator activity                                                                                                                              | 5.4800e-17       | 1.1803e-14  | 3.0382          | 3.0414e-5              | 1.6873          | 67                 |
|                              | translation factor activity, nucleic acid binding                                                                                                           | 1.0638e-14       | 1.8616e-12  | 2.9923          | 4.0063e-5              | 1.7404          | 58                 |
|                              | ATP-dependent helicase activity                                                                                                                             | 3.3682e-11       | 3.4929e-9   | 2.4342          | 0.0056                 | 1.5846          | 50                 |
|                              | helicase activity                                                                                                                                           | 1.7966e-10       | 1.7347e-8   | 2.0599          | 0.0021                 | 1.5072          | 70                 |
|                              | damaged DNA binding                                                                                                                                         | 2.4357e-10       | 2.2000e-8   | 3.2689          | 0.0116                 | 1.7949          | 28                 |
|                              | translation initiation factor activity                                                                                                                      | 3.6057e-10       | 3.1549e-8   | 3.2237          | 0.0232                 | 1.6621          | 33                 |
|                              | aminoacyl-tRNA ligase activity                                                                                                                              | 1.3738e-8        | 1.0123e-6   | 3.0756          | 0.0066                 | 1.8004          | 30                 |
|                              | ribosome binding                                                                                                                                            | 4.5960e-6        | 3.1401e-6   | 6.7343          | 0.0198                 | 2.5642          | 10                 |
| GO Biological Process        | RNA metabolic process                                                                                                                                       | 4.2382e-65       | 2.2102e-62  | 2.2094          | 1.2631e-28             | 1.5457          | 451                |
|                              | translation                                                                                                                                                 | 1.7417e-55       | 6.0552e-53  | 3.9977          | 1.2160e-21             | 1.8274          | 184                |
|                              | RNA processing                                                                                                                                              | 9.3906e-55       | 3.0607e-52  | 2.5397          | 3.4616e-23             | 1.6383          | 291                |
|                              | RNA splicing                                                                                                                                                | 7.9247e-36       | 1.7968e-33  | 2.6997          | 8.6801e-14             | 1.6719          | 163                |
|                              | translational elongation                                                                                                                                    | 1.9584e-35       | 4.0853e-33  | 5.0046          | 5.0700e-11             | 2.0147          | 70                 |
|                              | nuclear mRNA splicing, via spliceosome                                                                                                                      | 5.6968e-34       | 1.1003e-31  | 3.8015          | 5.9817e-10             | 1.7845          | 93                 |
|                              | ncRNA metabolic process                                                                                                                                     | 1.1302e-30       | 1.9013e-28  | 3.1360          | 3.2646e-11             | 1.7181          | 120                |
|                              | mRNA processing                                                                                                                                             | 1.4702e-29       | 2.2551e-27  | 2.3674          | 5.8427e-13             | 1.6211          | 173                |
|                              | mRNA metabolic process                                                                                                                                      | 2.8978e-29       | 4.0843e-27  | 2.2480          | 9.8524e-14             | 1.6022          | 192                |
|                              | ribonucleoprotein complex biogenesis                                                                                                                        | 1.5300e-28       | 1.9948e-26  | 3.0379          | 1.7360e-13             | 1.8279          | 116                |
| GO Cellular Component        | ribonucleoprotein complex                                                                                                                                   | 2.3452e-85       | 2.1732e-83  | 3.4787          | 3.6903e-34             | 1.8422          | 273                |
|                              | ribosome                                                                                                                                                    | 1.0257e-43       | 4.2773e-42  | 3.6010          | 5.8068e-16             | 1.8604          | 124                |
|                              | spliceosome                                                                                                                                                 | 1.6355e-32       | 5.2462e-31  | 3.6619          | 8.6851e-14             | 1.9431          | 93                 |
|                              | ribosomal subunit                                                                                                                                           | 5.3162e-29       | 1.6421e-27  | 4.0207          | 4.2256e-11             | 1.9408          | 75                 |
|                              | cytosolic part                                                                                                                                              | 5.0204e-24       | 1.4954e-22  | 3.3189          | 4.4737e-6              | 1.6273          | 75                 |
|                              | cytosolic ribosome                                                                                                                                          | 1.0812e-21       | 2.6179e-20  | 4.0959          | 3.1202e-8              | 1.9821          | 52                 |
|                              | large ribosomal subunit                                                                                                                                     | 3.0685e-20       | 7.3118e-19  | 4.5589          | 7.7293e-9              | 2.1938          | 42                 |
|                              | mitochondrial envelope                                                                                                                                      | 2.7070e-19       | 6.2712e-18  | 2.0567          | 0.0017                 | 1.2655          | 166                |
|                              | organelle inner membrane                                                                                                                                    | 3.9079e-19       | 8.8085e-18  | 2.2564          | 0.0001                 | 1.3648          | 135                |
|                              | mitochondrial membrane                                                                                                                                      | 1.9503e-18       | 4.1705e-17  | 2.0527          | 0.0039                 | 1.2545          | 157                |
| Pathway Commons              | Gene Expression                                                                                                                                             | 3.9265e-89       | 4.9200e-86  | 4.0080          | 3.0220e-31             | 1.8910          | 238                |
|                              | Transcription                                                                                                                                               | 5.9934e-87       | 3.7549e-84  | 4.1185          | 1.5935e-30             | 1.9088          | 224                |
|                              | Elongation of Intron-Containing Transcripts and co-transcriptional mRNA splicing                                                                            | 2.9275e-86       | 1.2227e-83  | 4.8261          | 1.1830e-27             | 1.9463          | 187                |
|                              | Elongation and Processing of Capped Transcripts                                                                                                             | 2.9275e-86       | 1.2227e-83  | 4.8261          | 1.1830e-27             | 1.9463          | 187                |
|                              | mRNA Processing                                                                                                                                             | 3.7889e-86       | 9.4949e-84  | 4.7393          | 6.0385e-28             | 1.9559          | 190                |
|                              | RNA Polymerase II Transcription Initiation And Promoter Clearance                                                                                           | 1.5086e-85       | 3.1504e-83  | 4.5575          | 9.1246e-28             | 1.9227          | 197                |
|                              | Formation and Maturation of mRNA Transcript                                                                                                                 | 1.5086e-85       | 3.1504e-83  | 4.5575          | 9.1246e-28             | 1.9227          | 197                |
|                              | RNA Polymerase II Promoter Escape                                                                                                                           | 1.5086e-85       | 3.1504e-83  | 4.5575          | 9.1246e-28             | 1.9227          | 197                |
|                              | RNA Polymerase II Transcription Initiation                                                                                                                  | 1.5086e-85       | 3.1504e-83  | 4.5575          | 9.1246e-28             | 1.9227          | 197                |
|                              | RNA Polymerase II Transcription Pre-Initiation                                                                                                              | 1.5086e-85       | 3.1504e-83  | 4.5575          | 9.1246e-28             | 1.9227          | 197                |
| MSigDB Pathway               | PGC related genes                                                                                                                                           | 9.6755e-28       | 6.8309e-25  | 2.1772          | 2.7293e-7              | 1.4069          | 207                |
|                              | Mitochondrial genes                                                                                                                                         | 1.3383e-23       | 4.7240e-21  | 2.0340          | 5.5695e-6              | 1.3468          | 212                |
|                              | RIBOSOMAL_PROTEINS                                                                                                                                          | 2.0663e-23       | 4.8627e-21  | 3.5812          | 6.0776e-9              | 1.9357          | 70                 |
|                              | Mitochondrial genes                                                                                                                                         | 2.2399e-22       | 3.9533e-20  | 2.0127          | 2.2529e-5              | 1.3368          | 200                |
|                              | Genes involved in ribosome                                                                                                                                  | 1.2110e-20       | 1.7100e-18  | 4.0108          | 2.1374e-7              | 2.0147          | 50                 |
|                              | Genes involved in mRNA splicing                                                                                                                             | 5.0332e-20       | 5.9224e-18  | 4.8383          | 6.2215e-6              | 2.0147          | 40                 |
|                              | mRNA_PROCESSING_REACTOME                                                                                                                                    | 1.1964e-16       | 1.2067e-14  | 2.6343          | 2.4596e-7              | 1.7689          | 74                 |
|                              | Genes involved in oxidative phosphorylation                                                                                                                 | 1.2690e-12       | 1.1199e-10  | 2.6232          | 0.0002                 | 1.6082          | 65                 |
|                              | Genes involved in electron transport                                                                                                                        | 3.6622e-11       | 2.8728e-9   | 2.6395          | 0.0009                 | 1.5918          | 57                 |
|                              | Genes involved in mRNA processing                                                                                                                           | 8.5381e-10       | 6.0279e-8   | 3.3697          | 0.0024                 | 1.8395          | 30                 |
| Transcription Factor Targets | Targets of ETS1, identified by ChIP-chip in Jurkat T-cells.                                                                                                 | 3.4132e-270      | 6.4851e-269 | 3.4879          | 2.1488e-143            | 2.0204          | 808                |
|                              | Targets of CREB, identified by ChIP-chip in HEK293T cells in three different time points after forskolin stimulation.                                       | 3.5031e-183      | 3.3279e-182 | 2.1772          | 5.3658e-94             | 1.5646          | 1232               |
|                              | Targets of YY1 identified by ChIP-chip.                                                                                                                     | 1.1973e-103      | 7.5828e-103 | 3.1056          | 9.8671e-32             | 1.5303          | 378                |
|                              | Targets of NRF1, identified by ChIP-chip in quiescent T98G cells.                                                                                           | 1.2152e-39       | 4.6177e-39  | 2.0980          | 2.7527e-10             | 1.3425          | 307                |
|                              | Genes that are bound by both E2F4 and p130 in three different growth arrest conditions, identified by ChIP-chip in T98G and U2OS cells under growth arrest. | 3.7910e-12       | 1.0290e-11  | 2.0126          | 0.0002                 | 1.3877          | 92                 |



**Supplementary Table 44:** GREAT enrichments of GABP using the *single nearest gene* association rule with a maximum extension of 1 Mb. Shown are the top ten binomial enriched terms at a false discovery rate of 0.05 with a fold enrichment of at least two that are also significant by the hypergeometric test, using the highest-scoring GABP peaks anywhere in the genome (QuEST score > 1; n = 3,585).

| Ontology                     | Term                                                                                                                                                        | Binomial Results |             |                 | Hypergeometric Results |                 |                    |
|------------------------------|-------------------------------------------------------------------------------------------------------------------------------------------------------------|------------------|-------------|-----------------|------------------------|-----------------|--------------------|
|                              | Name                                                                                                                                                        | Raw P-Value      | FDR Q-Val   | Fold Enrichment | FDR Q-Val              | Fold Enrichment | Observed Gene Hits |
| GO Molecular Function        | structural constituent of ribosome                                                                                                                          | 2.1218e-36       | 2.9705e-33  | 5.2719          | 1.5868e-25             | 3.2101          | 87                 |
|                              | RNA binding                                                                                                                                                 | 2.5194e-34       | 2.3514e-31  | 2.2915          | 1.0909e-26             | 1.9797          | 245                |
|                              | translation regulator activity                                                                                                                              | 3.6836e-16       | 1.7190e-13  | 3.8984          | 4.4586e-7              | 2.3084          | 49                 |
|                              | translation factor activity, nucleic acid binding                                                                                                           | 2.0086e-14       | 8.0345e-12  | 3.8774          | 2.5104e-7              | 2.4698          | 44                 |
|                              | nuclease activity                                                                                                                                           | 1.4380e-12       | 5.0329e-10  | 3.2284          | 0.0043                 | 1.7229          | 48                 |
|                              | unfolded protein binding                                                                                                                                    | 3.7230e-11       | 1.0424e-8   | 3.4905          | 0.0012                 | 1.9657          | 38                 |
|                              | translation initiation factor activity                                                                                                                      | 1.9623e-10       | 4.9948e-8   | 4.4195          | 0.0012                 | 2.3556          | 25                 |
|                              | endonuclease activity                                                                                                                                       | 3.9776e-10       | 9.2810e-8   | 3.8104          | 0.0145                 | 1.8844          | 30                 |
|                              | ribonucleoprotein binding                                                                                                                                   | 1.5622e-9        | 3.3647e-7   | 8.8610          | 6.6637e-5              | 3.8879          | 14                 |
|                              | RNA splicing factor activity, transesterification mechanism                                                                                                 | 1.9253e-9        | 3.3692e-7   | 7.8946          | 7.7540e-5              | 3.5176          | 16                 |
| GO Biological Process        | gene expression                                                                                                                                             | 3.3917e-106      | 3.5375e-103 | 2.1177          | 2.3665e-83             | 1.8397          | 811                |
|                              | RNA metabolic process                                                                                                                                       | 1.0634e-66       | 5.6497e-64  | 2.7423          | 2.7702e-52             | 2.2119          | 345                |
|                              | RNA processing                                                                                                                                              | 3.1977e-68       | 1.1911e-55  | 3.2786          | 5.6219e-43             | 2.4434          | 232                |
|                              | translation                                                                                                                                                 | 2.8058e-50       | 9.1451e-48  | 4.3120          | 9.0183e-35             | 2.7683          | 149                |
|                              | RNA splicing                                                                                                                                                | 8.1540e-39       | 2.3624e-36  | 3.4811          | 8.4019e-31             | 2.6862          | 140                |
|                              | nuclear mRNA splicing, via spliceosome                                                                                                                      | 4.1184e-35       | 1.1304e-32  | 5.0670          | 2.3206e-20             | 2.9074          | 81                 |
|                              | protein transport                                                                                                                                           | 3.1541e-32       | 8.2244e-30  | 2.2169          | 6.5829e-21             | 1.8253          | 238                |
|                              | establishment of protein localization                                                                                                                       | 1.8205e-31       | 4.5208e-29  | 2.1916          | 1.5340e-20             | 1.8147          | 238                |
|                              | mRNA processing                                                                                                                                             | 1.1170e-30       | 2.6478e-28  | 2.9530          | 1.9632e-24             | 2.4191          | 138                |
|                              | ribonucleoprotein complex biogenesis                                                                                                                        | 1.5682e-30       | 3.5557e-28  | 4.0674          | 1.0442e-23             | 2.8593          | 97                 |
| GO Cellular Component        | ribonucleoprotein complex                                                                                                                                   | 2.6615e-84       | 3.1710e-82  | 4.6002          | 4.0476e-58             | 2.8654          | 227                |
|                              | nuclear part                                                                                                                                                | 4.9215e-58       | 3.4204e-56  | 2.1425          | 8.4057e-45             | 1.8410          | 463                |
|                              | intracellular organelle lumen                                                                                                                               | 2.9592e-47       | 1.7629e-45  | 2.0643          | 7.3359e-38             | 1.8000          | 422                |
|                              | membrane-enclosed lumen                                                                                                                                     | 8.5657e-46       | 4.7625e-44  | 2.0099          | 1.0067e-36             | 1.7642          | 435                |
|                              | ribosome                                                                                                                                                    | 1.2868e-40       | 6.3128e-39  | 4.8366          | 1.6749e-29             | 3.0031          | 107                |
|                              | nuclear lumen                                                                                                                                               | 6.7757e-40       | 3.1394e-38  | 2.1144          | 1.0124e-32             | 1.8539          | 338                |
|                              | nucleoplasm                                                                                                                                                 | 7.3763e-38       | 3.2378e-36  | 2.3100          | 2.4876e-30             | 1.9632          | 269                |
|                              | mitochondrion                                                                                                                                               | 4.6332e-36       | 1.8400e-34  | 2.1445          | 4.1703e-16             | 1.5682          | 299                |
|                              | spliceosome                                                                                                                                                 | 1.8773e-33       | 7.1168e-32  | 4.9201          | 8.2011e-23             | 3.0877          | 79                 |
|                              | cytosol                                                                                                                                                     | 9.3874e-32       | 3.4076e-30  | 2.0378          | 1.4327e-18             | 1.6387          | 291                |
| Pathway Commons              | Transcription                                                                                                                                               | 2.8978e-90       | 3.6310e-87  | 5.8057          | 8.5929e-56             | 3.0925          | 194                |
|                              | Gene Expression                                                                                                                                             | 3.4127e-89       | 2.1381e-86  | 5.5758          | 1.0478e-55             | 3.0172          | 203                |
|                              | Elongation of Intron-Containing Transcripts and co-transcriptional mRNA splicing                                                                            | 3.3726e-88       | 1.4086e-85  | 6.8918          | 2.8220e-50             | 3.1931          | 164                |
|                              | Elongation and Processing of Capped Transcripts                                                                                                             | 3.3726e-88       | 1.4086e-85  | 6.8918          | 2.8220e-50             | 3.1931          | 164                |
|                              | RNA Polymerase II Transcription Initiation And Promoter Clearance                                                                                           | 5.0913e-88       | 1.2759e-85  | 6.5059          | 1.5533e-51             | 3.1586          | 173                |
|                              | Formation and Maturation of mRNA Transcript                                                                                                                 | 5.0913e-88       | 1.2759e-85  | 6.5059          | 1.5533e-51             | 3.1586          | 173                |
|                              | RNA Polymerase II Promoter Escape                                                                                                                           | 5.0913e-88       | 1.2759e-85  | 6.5059          | 1.5533e-51             | 3.1586          | 173                |
|                              | RNA Polymerase II Transcription Initiation                                                                                                                  | 5.0913e-88       | 1.2759e-85  | 6.5059          | 1.5533e-51             | 3.1586          | 173                |
|                              | RNA Polymerase II Transcription Pre-Initiation                                                                                                              | 5.0913e-88       | 1.2759e-85  | 6.5059          | 1.5533e-51             | 3.1586          | 173                |
|                              | RNA Polymerase II Transcription                                                                                                                             | 5.0913e-88       | 1.2759e-85  | 6.5059          | 1.5533e-51             | 3.1586          | 173                |
| MSigDB Pathway               | RIBOSOMAL_PROTEINS                                                                                                                                          | 1.7957e-21       | 1.2677e-18  | 4.5398          | 1.0374e-15             | 3.0521          | 59                 |
|                              | PGC related genes                                                                                                                                           | 4.8434e-21       | 1.7097e-18  | 2.3807          | 2.3458e-8              | 1.6783          | 132                |
|                              | Genes involved in ribosome                                                                                                                                  | 1.1448e-20       | 2.6940e-18  | 5.3257          | 1.1287e-16             | 3.6181          | 48                 |
|                              | Genes involved in mRNA splicing                                                                                                                             | 1.2956e-20       | 2.2867e-18  | 7.1205          | 1.5591e-10             | 3.2978          | 35                 |
|                              | Mitochondrial genes                                                                                                                                         | 5.6209e-18       | 7.9368e-16  | 2.2070          | 3.3073e-7              | 1.6043          | 135                |
|                              | Mitochondrial genes                                                                                                                                         | 2.7105e-17       | 3.1893e-15  | 2.1924          | 1.6410e-6              | 1.5879          | 127                |
|                              | MRNA_PROCESSING_REACTOME                                                                                                                                    | 3.7798e-17       | 3.8122e-15  | 3.3351          | 2.7966e-13             | 2.7276          | 61                 |
|                              | Genes involved in mRNA processing                                                                                                                           | 4.2519e-12       | 3.7523e-10  | 5.2418          | 7.5923e-6              | 2.8676          | 25                 |
|                              | RNA_TRANSCRIPTION_REACTOME                                                                                                                                  | 5.1228e-10       | 4.0185e-8   | 5.9776          | 0.0023                 | 2.5063          | 19                 |
|                              | Genes involved in oxidative phosphorylation                                                                                                                 | 6.3831e-10       | 4.5065e-8   | 2.9198          | 0.0004                 | 1.9439          | 42                 |
| Transcription Factor Targets | Targets of ETS1, identified by ChIP-chip in Jurkat T-cells.                                                                                                 | 1.3317e-297      | 2.5302e-296 | 4.8992          | 1.5743e-226            | 3.1949          | 683                |
|                              | Targets of CREB, identified by ChIP-chip in HEK293T cells in three different time points after forskolin stimulation.                                       | 1.1324e-205      | 1.0758e-204 | 2.8108          | 2.2906e-164            | 2.2237          | 936                |
|                              | Targets of YY1 identified by ChIP-chip.                                                                                                                     | 3.6189e-106      | 2.2920e-105 | 4.1515          | 2.8140e-61             | 2.4769          | 307                |
|                              | Targets of NRF1, identified by ChIP-chip in quiescent T98G cells.                                                                                           | 2.8400e-33       | 1.0792e-32  | 2.4186          | 2.5183e-15             | 1.6852          | 206                |
|                              | Genes that are bound by both E2F4 and p130 in three different growth arrest conditions, identified by ChIP-chip in T96G and U2OS cells under growth arrest. | 9.5204e-12       | 2.5841e-11  | 2.3270          | 9.6987e-10             | 2.0316          | 72                 |

**Supplementary Table 45:** GREAT analysis table locations.

| Dataset               | Author/DAVID<br>Proximal promoter | Test type                                           |                                                 |                                                  |                                                     |                                                       |
|-----------------------|-----------------------------------|-----------------------------------------------------|-------------------------------------------------|--------------------------------------------------|-----------------------------------------------------|-------------------------------------------------------|
|                       |                                   | GREAT<br><i>basal+extension</i> *<br>Up to 1,000 kb | “Gene-based GREAT”<br>Proximal promoter<br>2 kb | GREAT<br><i>basal+extension</i> *<br>Up to 50 kb | GREAT<br><i>two nearest genes</i><br>Up to 1,000 kb | GREAT<br><i>single nearest gene</i><br>Up to 1,000 kb |
| <b>SRF</b>            | Table 2                           | Table 3                                             | Sup. Table 6                                    | Sup. Table 7                                     | Sup. Table 8                                        | Sup. Table 9                                          |
| <b>p300 Limb</b>      | Sup. Table 10a                    | Sup. Table 10b                                      | Sup. Table 11                                   | Sup. Table 12                                    | Sup. Table 13                                       | Sup. Table 14                                         |
| <b>p300 Forebrain</b> | Sup. Table 15a                    | Sup. Table 15b                                      | Sup. Table 16                                   | Sup. Table 17                                    | Sup. Table 18                                       | Sup. Table 19                                         |
| <b>p300 Midbrain</b>  | Sup. Table 20a                    | Sup. Table 20b                                      | Sup. Table 21                                   | Sup. Table 22                                    | Sup. Table 23                                       | Sup. Table 24                                         |
| <b>p300 mESC</b>      | Sup. Table 25a                    | Sup. Table 25b                                      | Sup. Table 26                                   | Sup. Table 27                                    | Sup. Table 28                                       | Sup. Table 29                                         |
| <b>Stat3</b>          | Sup. Table 30a                    | Sup. Table 30b                                      | Sup. Table 31                                   | Sup. Table 32                                    | Sup. Table 33                                       | Sup. Table 34                                         |
| <b>NRSF</b>           | Sup. Table 35a                    | Sup. Table 35b                                      | Sup. Table 36                                   | Sup. Table 37                                    | Sup. Table 38                                       | Sup. Table 39                                         |
| <b>GABP</b>           | Sup. Table 40a                    | Sup. Table 40b                                      | Sup. Table 41                                   | Sup. Table 42                                    | Sup. Table 43                                       | Sup. Table 44                                         |

\* The *basal plus extension* rules both define basal regulatory domains to extend 5 kb upstream and 1 kb downstream from the transcription start site of each gene.

**Supplementary Table 46:** Analysis of SRF GO term enrichments. **(a)** Terms significant by both the binomial and hypergeometric tests highlight many genes involved in the process with many genomic regions implicating the genes as well. Skews between the fraction of genes annotated with the term and the fraction of the genome that maps to one or more genes annotated with the term are generally modest. **(b)** Terms significant by the hypergeometric test but not the binomial test arise either due to large differences between the fraction of genes annotated with the term and the fraction of the genome that maps to one or more genes annotated with the term or the association of a single genomic region to multiple genes annotated with the term. **(c)** Terms significant by the binomial test but not the hypergeometric test arise when many genomic regions cluster near one or few genes annotated with the term, and indicate gene-specific enrichments rather than broad term-based enrichment.

**a**

**Terms significant by both binomial and hypergeometric tests ( $B \cap H$ , listed in Table 1b)**

| GO ID      | Description           | Genes Hit | SRF Peaks | Fraction of Genes | Fraction of Genome |
|------------|-----------------------|-----------|-----------|-------------------|--------------------|
| GO:0015629 | actin cytoskeleton    | 30        | 36        | 0.013185          | 0.021250           |
| GO:0030863 | cortical cytoskeleton | 11        | 7         | 0.001859          | 0.003351           |
| GO:0003779 | actin binding         | 31        | 37        | 0.017483          | 0.032754           |

**b**

**Terms significant by the hypergeometric test but not the binomial test ( $H \setminus B$ )**

| GO ID      | Description                                             | Genes Hit | SRF Peaks | Fraction of Genes | Fraction of Genome |
|------------|---------------------------------------------------------|-----------|-----------|-------------------|--------------------|
| GO:0010604 | positive regulation of macro-molecule metabolic process | 53        | 61        | 0.033862          | 0.073249           |
| GO:0005634 | nucleus                                                 | 284       | 279       | 0.284951          | 0.419860           |
| GO:0009893 | positive regulation of metabolic process                | 54        | 62        | 0.036011          | 0.077215           |
| GO:0005515 | protein binding                                         | 397       | 351       | 0.423419          | 0.604715           |
| GO:0019899 | enzyme binding                                          | 33        | 37        | 0.018702          | 0.037255           |

**c**

**Terms significant by the binomial test but not the hypergeometric test ( $B \setminus H$ )**

| GO ID      | Description                              | Genes Hit | SRF Peaks | Fraction of Genes | Fraction of Genome |
|------------|------------------------------------------|-----------|-----------|-------------------|--------------------|
| GO:0032796 | uropod organization                      | 2         | 5         | 0.000116          | 0.000100           |
| GO:0035267 | NuA4 histone acetyltransferase complex   | 2         | 6         | 0.000348          | 0.000231           |
| GO:0043189 | H4/H2A histone acetyltransferase complex | 2         | 6         | 0.000407          | 0.000262           |
| GO:0043534 | blood vessel endothelial cell migration  | 2         | 6         | 0.000290          | 0.000309           |
| GO:0000212 | meiotic spindle organization             | 1         | 4         | 0.000116          | 0.000092           |
